# Supplementary material for: Pmar1/phb homeobox genes and the evolution of the double-negative gate for endomesoderm specification in echinoderms
Source: Oxford University Press journal article supplement (doi:10.1242/dev.182139), 2020-01-01
Supplement: dev182139supp.pdf [file dev182139supp.pdf]

## Supplementary Materials and Methods

### Screening of upstream gene candidates for larval skeleton formation in the cidaroid *P. baculosa* and collection of *pmar1/phb*-related genes from other echinoderms

For RNA-seq of *P. baculosa*, RNA was extracted using TRIzol Reagent (Life Technologies) and RNeasy Mini Kit (Qiagen). Paired-end libraries 151 bp in insert length were prepared, and libraries were sequenced on a NextSeq 500 platform (Illumina). Library preparation and sequencing were performed by Bioengineering Lab (Kanagawa, Japan). The short reads obtained were deposited in the Sequence Reads Archives of DDBJ (<https://www.ddbj.nig.ac.jp/index-e.html>) (accession number: DRA008358). The reads were trimmed and filtered by Trimmomatic (ver. 0.32) and NGS QC toolkit (ver. 2.3.3) (Bolger et al., 2014; Patel and Jain, 2012). De novo assembly was conducted with Trinity 2.2.0 (Grabherr et al., 2013). The FPKM values were calculated by RSEM with the Bowtie2 option (ver 1.2.18) (Li and Dewey, 2011).

We identified *pmar1* and *phb1* sequences of *E. tribuloides* using genomic and transcriptomic databases available in EchinoBase (<http://www.echinobase.org/Echinobase/>) (Kudtarkar and Cameron, 2017) by BLAST-based approach. For *pmar1*, we obtained two scaffolds (scaffolds 7904 and 10027) containing *pmar1*-like sequences from *E. tribuloides* genome 1.0 database. Assuming that *pmar1* of this species also includes an intron in the same position with that of euechinoid *pmar1*, we manually predicted the *pmar1* sequences. The positions of exons for each *pmar1* sequence in these scaffolds are follows: for scaffold 7904, *pmar1*-1 (31930–31736 and 30275–29771), *pmar1*-2 (37174–36980 and 35956–35455), *pmar1*-3 (43769–43575 and 42591–42093), *pmar1*-4 (48119–48313 and 49773–50277), and *pmar1*-L1 (40267–40067); for scaffold 10027, *pmar1*-5 (8703–8509 and 7240–6736), *pmar1*-6 (14248–14054 and 12559–12055), *pmar1*-7 (17164–17358 and 18775–19282), and *pmar1*-8 (24452–24643 and 26002–26503). For the *pmar1*-L1, start codon is substituted for the codon coding Y, and second exon was not found. The *E. tribuloides phb1* sequence (Locus\_6652\_Transcript\_2/4\_Confidence\_0.750) was obtained from *E. tribuloides* transcripts database of EchinoBase.

For the brittle star *A. kochii*, sea cucumber *A. japonicus*, and feather star *O. japonicus*, we searched the *pmar1/phb1*-related sequences using the BLAST-based approach on the transcript sequences assembled as mentioned above for *P. baculosa*. For the data of *A. japonicus* and feather star *O. japonicus*, trimming and filtering were not performed. The sequenced RNAs were derived from following developmental stages: for *A. kochii*, 4-cell (2 h), early blastula (4 h), mid-blastula (6 h), and hatched

blastula (8 h) stages; for *A. japonicus*, fertilized egg, 4-cell, morula, blastula, gastrula, late gastrula, early auricularia larva, and mid-auricularia larva stages; for *O. japonicus*, unfertilized egg, 2-cell, 8-cell, 32-cell, gastrula, hatched gastrula, early doliolaria larva, and doliolaria larva stages. The raw RNA-seq data of *A. kochii* was deposited in DDBJ (accession number: DRA008359). The RNA sequencing data of *A. japonicus* and *O. japonicus* were kindly provided by Naoki Irie.

For other echinoderms, we also surveyed *pmar1/phb1*-related sequences by BLAST search using *Pb-pmar1*, *phb1*, or *phb* sequences against for available genomic/transcriptomic data. The sequence of euechinoid *H. pulcherrimus phb1* (HPU\_10182) was collected from HpBase (<http://cell-innovation.nig.ac.jp/Hpul/>) (Kinjo et al., 2018). The starfish *P. pectinifera phbA* and *phbB* were obtained from transcriptome data previously described in Kawai et al. (Kawai et al., 2016). For starfish *P. miniata*, *phbA* (gi|307020228|gb|HP094737.1|) was obtained from *Patiria miniata* RNA database of EchinoBase, whereas *phbB* was predicted from *Patiria miniata* contig\_136381 (the position of homeodomain: 20733–20596 and 20052–20011) included in the *Patiria miniata* contigs 1.0 database of EchinoBase. The amplified sequences of *P. pectinifera phbA* and *phbB* were deposited in DDBJ (accession numbers: LC483153 and LC483154, respectively). The *A. planci phbA* and *phbB* (IDs: oki.14.227.t1 for *phbA* and oki.242.12.t1 for *phbB*) were collected from the cots\_genemodels\_nucl database of OIST Marine Genomics Unit (<https://marinegenomics.oist.jp>) (Hall et al., 2017). For sea cucumbers *Holothuria leucospilota* and *Parastichopus parvimensis*, *phb* sequences were collected from transcript assembly of Koga et al. (2016) and that obtained from EchinoBase (Pparv.xome11.fa; ID: Locus\_3449\_Transcript\_32/68), respectively. After collection of *pmar1/phb* candidates, we performed molecular phylogenetic analysis as described below to identify each sequence.

### Molecular phylogenetic analysis

Alignment of the homeodomain sequences (60 amino acids) was performed using SeaView software (Gouy et al., 2010). The best-fitting amino acid substitution model and maximum likelihood tree were inferred using RAxML software (ver. 8.2.0) (Stamatakis et al., 2008). The bootstrap values were calculated using 1,000 replicates. The aligned HD sequences used to construct the maximum likelihood tree of Figure 1 are shown in Data S2.

### Whole-mount *in situ* hybridization (WMISH)

The fixation of embryos was performed as described previously (Yamazaki et al., 2010; Koga et al., 2010). The hybridization and staining were carried out according to the method of Morino et al. (2012). The concentrations of RNA probes in hybridization buffer were 100 ng/ml for *H. pulcherrimus* and *P. baculosa*, 250 ng/ml for *P. pectinifera*, *A. kochii*, and *A. japonicus* embryos. The primers used for amplification of cDNA fragments for RNA probes are shown in Table S2. For the other genes, we prepared RNA probes using DNA fragments described previously (Yamazaki et al., 2014; Koga et al., 2010).

### Perturbation experiments

The mRNAs used in the overexpression experiments were synthesized from linearized plasmids using a mMESSAGE mMACHINE (Thermo Fisher Scientific). The mRNA was transcribed from a pBluescript RN3' plasmid (Nishimura et al., 2004) containing the whole coding sequence or that fused to *Drosophila* engrailed repression region (EnR) or VP16AD which was cloned using In-Fusion HD Cloning Kit (Takara Bio). The primers used for preparing constructs are follows:

|                                       |                                        |
|---------------------------------------|----------------------------------------|
| 5'-AACTTTGGCAGATCTATGGCCGAATCGACA-3'; | <i>Pb-pmar1</i> -cds-F,                |
| 5'-CAGATCCGCGCCGCTCAGTGAAATCTGGT-3';  | <i>Pb-pmar1</i> -cds-R,                |
| 5'-AACTTTGGCAGATCTATGCCTGCTAACGCT-3'; | <i>Ppec-phbA</i> -cds-F,               |
| 5'-CAGATCCGCGCCGCTCAGTGGCGAGCAAT-3';  | <i>Ppe-phbA</i> -cds-R,                |
| 5'-AACTTTGGCAGATCTATGTCTTCTGCTGCC-3'; | <i>Ppe-phbB</i> -cds-F,                |
| 5'-CAGATCCGCGCCGCTTACATGTGATGGGA-3';  | <i>Ppe-phbB</i> -cds-R,                |
| 5'-AACTTTGGCAGATCTATGGCCCTGGAGGAT-3'; | Enr-fusion-F,                          |
| 5'-AGCGTTAGCAGGCATCGAACCCAGAGCAGA-3'; | Enr- <i>Ppe-phbA</i> -cds-fusion-R,    |
| 5'-GGCAGCAGAAGACATCGAACCCAGAGCAGA-3'; | Enr- <i>Ppe-phbB</i> -cds-fusion-R,    |
| 5'-AACTTTGGCAGATCTAAGCTAGCGCCGCCA-3'; | VP16AD-fusion-F,                       |
| 5'-AGCGTTAGCAGGCATGAATCCCCACCGTA-3';  | VP16AD- <i>Ppe-phbA</i> -fusion-cds-R, |
| 5'-GGCAGCAGAAGACATGAATCCCCACCGTA-3';  | VP16AD- <i>Ppe-phbB</i> -fusion-cds-R, |
| 5'-AGATCTGCCAAAGTTGAGCGTTTATTCTGA-3'; | RN3prime-BglII-fusion-R1,              |
| 5'-GCGGCCGCGGATCTGGTTACCACTAAACCA-3'. | and RN3prime-NotI-fusion-F1,           |

The *Hp-micro1* mRNA was synthesized from the construct described previously (Nishimura et al., 2004). The translational perturbations of *P. pectinifera phbA*, *phbB*, and *hesC* were performed using MOs purchased from GeneTools (Philomath, OR, USA). As a control, the MO for the homeobox gene from the limpet *Nipponacmea fuscoviridis*. The MO sequences were as follows: *Ppe-PhbA*-MO, 5'- AGCGTTAGCAGGCATGGTGTGAATA-3'; *Ppe-PhbB*-MO, 5'-ATACACGGCAGCAGAAGACATGGTT-3'; *Ppe-hesC*-MO-1, 5'-

TCATGCTGAAGATTGTCGAAGGACA-3'; *Ppe-hesC*-MO-2, 5'-  
 AATTGGGCACGAGAGCCGTATTTAT-3'; and *Nf-PRD-V-A*-MO,  
 5'-GGATTTATAGCCTACCTGAGCAGAA-3'. The MO and mRNA were introduced into the  
 embryos by microinjection according to the methods of Yamazaki et al. (2014) for  
 echinoids and that of Saito et al. (2017) for the starfish. The mRNAs and MOs were  
 diluted with 0.2 M KCl and the concentrations used for microinjection were 125 ng/μl  
 for *Pb-pmar1* mRNA, 250 ng/μl for *Ppe-phbA* mRNA, 500 ng/μl for *Ppe-phbB* mRNA,  
 250 ng/μl for *Ppe-phbA-EnR*, 250 ng/μl for *Ppe-phbB-EnR*, 1000 ng/μl for  
*Ppe-phbA-VP16AD*, 1000 ng/μl for *Ppe-phbB-VP16AD*, 1 mM for starfish *phb* MOs, and  
 1–2 mM for starfish *hesC*. DAPT was used to inhibit Notch signaling (Erkenbrack et al.,  
 2018). The embryos of *P. baculosa* and *P. pectinifera* were treated with 10 μM and  
 2–10 μM DAPT, respectively. The DAPT was added at the 2-cell stage in both embryos.  
 All experiments were conducted in more than two batches.

#### Evaluation of mesenchyme cell and endoderm differentiation

Skeletogenic cell differentiation in echinoid embryos was evaluated using the P4  
 antibody, which recognizes the skeletogenic cell-specific glycoprotein in *H.*  
*pulcherrimus* (Shimizu et al., 1988). The embryos that had been fixed for WMISH  
 analysis were used. As the secondary antibody, goat anti-mouse IgG (H+L)  
 cross-adsorbed secondary antibody, Alexa Fluor 488 (diluted 1:200; Thermo Fisher  
 Scientific) and the goat antibody against mouse IgGs (heavy and light chains) Hilyte  
 Fluor 555-Labeled (diluted 1:200; AnaSpec) were used for *H. pulcherrimus* and *P.*  
*baculosa*, respectively. The total cell numbers of mesenchyme cells were counted in *P.*  
*baculosa* embryos fixed for WMISH analysis. In the starfish *P. pectinifera* embryos, MC5  
 antibody was used for visualization of mesenchyme cells. The fixation and staining  
 were performed according to the method of Hamanaka et al. (2011). The goat  
 anti-mouse IgG (H+L) cross-adsorbed secondary antibody, Alexa Fluor 488 (diluted  
 1:200; Thermo Fisher Scientific) was used as the secondary antibody. The staining of AP  
 activity was performed by the method of Koga et al. (2010).

## Supplementary References

- Bolger, A. M., Lohse, M. and Usadel, B.** (2014). Trimmomatic: a flexible trimmer for Illumina sequence data. *Bioinformatics* **30**, 2114–2120.
- Dylus, D. V., Czarkwiani, A., Stångberg, J., Ortega-Martinez, O., Dupont, S. and Oliveri, P.** (2016). Large-scale gene expression study in the ophiuroid *Amphiura Filiformis* provides insights into evolution of gene regulatory networks. *EvoDevo* **7**, 2.
- Erkenbrack, E. M., Davidson, E. H. and Peter, I. S.** (2018). Conserved regulatory state expression controlled by divergent developmental gene regulatory networks in echinoids. *Development* **145**, dev167288.
- Gouy, M., Guindon, S. and Gascuel, O.** (2010). SeaView version 4: A multiplatform graphical user interface for sequence alignment and phylogenetic tree building. *Mol. Biol. Evol.* **27**, 221–224.
- Grabherr, M. G., Haas, B. J., Yassour, M., Levin, J. Z., Thompson, D. A., Amit, I., Adiconis, X., Fan, L., Raychowdhury, R., Zeng, Q., et al.** (2013). Trinity: reconstructing a full-length transcriptome without a genome from RNA-Seq data. *Nat. Biotechnol.* **29**, 644–652.
- Hall, M. R., Kocot, K. M., Baughman, K. W., Fernandez-Valverde, S. L., Gauthier, M. E. A., Hatleberg, W. L., Krishnan, A., McDougall, C., Motti, C. A. et al.** (2017). The crown-of-thorns starfish genome as a guide for biocontrol of this coral reef pest. *Nature* **544**, 231–234.
- Hamanaka, G., Hosaka, E., Kuraishi, R., Hosoya, N., Matsumoto, M. and Kaneko, H.** (2011). Uneven distribution pattern and increasing numbers of mesenchyme cells during development in the starfish, *Asterina Pectinifera*. *Dev. Growth Differ.* **53**, 440–449.
- Kawai, N., Kuraishi, R. and Kaneko, H.** (2016). Wnt, Frizzled, and sFRP gene expression patterns during gastrulation in the starfish *Patiria (Asterina) pectinifera*. *Gene Exp. Patterns* **21**, 19–27.
- Kinjo, S., Kiyomoto, M., Yamamoto, T., Ikeo, K. and Yaguchi, S.** (2018). HpBase: A genome database of a sea urchin, *Hemicentrotus pulcherrimus*. *Dev. Growth Differ.* **60**, 174–182.
- Koga, H., Fujitani, H., Morino, Y., Miyamoto, N., Tsuchimoto, J., Shibata, T. F., Nozawa, M., Shigenobu, S., Ogura, A. et al.** (2016). Experimental approach reveals the role of *alx1* in the evolution of the echinoderm larval skeleton. *PLoS One* **11**, e0149067.

- Koga, H., Matsubara, M., Fujitani, H., Miyamoto, N., Komatsu, M., Kiyomoto, M., Akasaka, K. and Wada, H.** (2010). Functional evolution of Ets in echinoderms with focus on the evolution of echinoderm larval skeletons. *Dev. Genes Evol.* **220**, 107–115.
- Kudtarkar, P. and Cameron, R. A.** (2017). Echinobase: an expanding resource for echinoderm genomic information. *Database* **2017**, bax074.
- Li, B. and Dewey, C. N.** (2011). RSEM: accurate transcript quantification from RNA-Seq data with or without a reference genome. *BMC Bioinformatics* **12**, 323.
- Morino, Y., Koga, H., Tachibana, K., Shoguchi, E., Kiyomoto, M. and Wada, H.** (2012). Heterochronic activation of VEGF signaling and the evolution of the skeleton in echinoderm pluteus larvae. *Evol. Dev.* **14**, 428–436.
- Nishimura, Y., Sato, T., Morita, Y., Yamazaki, A., Akasaka, K. and Yamaguchi, M.** (2004). Structure, regulation, and function of micro1 in the sea urchin *Hemicentrotus pulcherrimus*. *Dev. Genes Evol.* **214**, 525–536.
- Patel, R. K. and Jain, M.** (2012). NGS QC toolkit: a toolkit for quality control of next generation sequencing data. *PLoS One* **7**, e30619.
- Saito, S., Hamanaka, G., Kawai, N., Furukawa, R., Gojobori, J., Tominaga, M., Kaneko, H. and Satta, Y.** (2017). Characterization of TRPA channels in the starfish *Patiria pectinifera*: involvement of thermally activated TRPA1 in thermotaxis in marine planktonic larvae. *Sci. Rep.* **7**, 2173.
- Shimizu, K., Noro, N. and Ryoichi, M.** (1988). Micromere differentiation in the sea urchin embryo: expression of primary mesenchyme cell specific antigen during development. *Dev. Growth Differ.* **30**, 35–47.
- Stamatakis, A., Hoover, P. and Rougemont, J.** (2008). A rapid bootstrap algorithm for the RAxML web servers. *Syst. Biol.* **57**, 758–771.
- Yamazaki, A., Kidachi, Y., Yamaguchi, M. and Minokawa, T.** (2014). Larval mesenchyme cell specification in the primitive echinoid occurs independently of the double-negative gate. *Development* **141**, 2669–2679.
- Yamazaki, A., Furuzawa, Y. and Yamaguchi, M.** (2010). Conserved early expression patterns of micromere specification genes in two echinoid species belonging to the orders clypeasteroida and echinoida. *Dev. Dyn.* **239**, 3391–3403.
- Yamazaki, A., Kidachi, Y. and Minokawa, T.** (2012). ‘Micromere’ formation and expression of endomesoderm regulatory genes during embryogenesis of the primitive echinoid *Prionocidaris baculosa*. *Dev. Growth Differ.* **54**, 566–578.

## Supplementary Tables

**Table S1.** FPKM values for *alx1* and candidate upstream regulatory genes during early developmental stages of *P. baculosa*.

| Gene name         | DNA-binding motif | FPKM value |       |        |        |       |
|-------------------|-------------------|------------|-------|--------|--------|-------|
|                   |                   | 2 h        | 4 h   | 6 h    | 10 h   | 14 h  |
| <i>alx1</i>       | Homeobox          | 0.05       | 0     | 0.08   | 11.54  | 21.62 |
| <i>pmar1</i>      | Homeobox          | 0.44       | 1.96  | 11.04  | 2.44   | 0.2   |
| <i>z137</i>       | zf-C2H2           | 0.18       | 0.58  | 1.44   | 9.05   | 3.66  |
| <i>thr_1</i>      | zf-C4             | 6.98       | 7.3   | 6.06   | 59.71  | 7.12  |
| <i>hypp_2098</i>  | Hairy_orange      | 0.43       | 0.2   | 0.95   | 8.2    | 7.53  |
| <i>smarce1</i>    | HMG_box           | 1.18       | 0.89  | 1.84   | 9.56   | 9.51  |
| <i>hesD</i>       | HLH               | 1.56       | 0.67  | 1.05   | 8.69   | 13.69 |
| <i>foxO</i>       | Forkhead          | 1.26       | 1.96  | 2.42   | 18.66  | 14.03 |
| <i>hbn</i>        | Homeobox          | 0          | 0.03  | 2.28   | 8.12   | 16.53 |
| <i>nkx2-1</i>     | Homeobox          | 0.55       | 0.35  | 1      | 6.45   | 17.84 |
| <i>runt</i>       | Runt              | 3.37       | 2.87  | 3.03   | 34.01  | 24.12 |
| <i>crebzf</i>     | bZIP_1            | 1.87       | 1.54  | 7.74   | 20.12  | 26.08 |
| <i>elfA</i>       | Ets               | 0.29       | 0.16  | 5.68   | 33.03  | 28.44 |
| <i>l3mbt</i>      | zf-C2HC           | 0          | 1.68  | 1.41   | 10.3   | 28.44 |
| <i>emx</i>        | Homeobox          | 0.74       | 0.62  | 4.8    | 30.64  | 29.08 |
| <i>awh</i>        | Homeobox          | 0          | 0.14  | 40.56  | 40.76  | 31.18 |
| <i>sp5</i>        | zf-C2H2           | 0          | 0.21  | 9.43   | 32.26  | 32.11 |
| <i>nfat</i>       | RHD_DNA_bind      | 1.89       | 2.43  | 4.07   | 20     | 36.88 |
| <i>lim1</i>       | Homeobox          | 1.18       | 0.93  | 1.39   | 40.8   | 40.09 |
| <i>bra</i>        | T-box             | 0          | 0.26  | 0.65   | 39.95  | 41.2  |
| <i>ets4</i>       | Ets               | 9.68       | 10.79 | 162.38 | 79.23  | 41.9  |
| <i>z246-like1</i> | zf-C2H2           | 0          | 0.58  | 2.81   | 8.96   | 42.4  |
| <i>nfe2</i>       | bZIP_1            | 5.43       | 3.31  | 8.78   | 53.81  | 45.2  |
| <i>cebpaL</i>     | bZIP_1            | 0          | 0.77  | 7.85   | 11.07  | 74.22 |
| <i>krlL-like1</i> | zf-C2H2           | 14.52      | 92.6  | 221.1  | 266.66 | 75.22 |
| <i>z246-like2</i> | zf-C2H2           | 1.33       | 0.55  | 1.74   | 15     | 81.68 |

|                  |          |      |       |        |        |        |
|------------------|----------|------|-------|--------|--------|--------|
| <i>eve</i>       | Homeobox | 0.21 | 4.59  | 69.66  | 44.45  | 84.81  |
| <i>z185</i>      | zf-C2H2  | 6.3  | 7.59  | 13.31  | 111.69 | 85     |
| <i>krl-like2</i> | zf-C2H2  | 7.58 | 44.23 | 156.88 | 225.43 | 85.42  |
| <i>hesA</i>      | HLH      | 0.08 | 0.34  | 15.74  | 64.09  | 95.84  |
| <i>soxC</i>      | HMG_box  | 0.06 | 0.05  | 8.9    | 80.89  | 106.31 |
| <i>rxr</i>       | zf-C2H2  | 0.27 | 0.27  | 3.44   | 84.8   | 110.15 |
| <i>foxA</i>      | Forkhead | 0.1  | 0.13  | 1.67   | 36.32  | 133.94 |
| <i>myc</i>       | HLH      | 5.55 | 3.4   | 10.7   | 56.88  | 154.9  |
| <i>klf2/4</i>    | zf-C2H2  | 0.52 | 3.29  | 119.92 | 295.57 | 181.89 |
| <i>creb3l3</i>   | bZIP_2   | 8.53 | 4.19  | 8.31   | 140.11 | 188.55 |
| <i>atf4L</i>     | bZIP_1   | 3.96 | 2.48  | 15.7   | 186.79 | 459.34 |

**Table S2.** Primers used for cDNA fragment amplifications for RNA probes.

| Animals  | Species            | Gene name        | Primer name | Sequence 5'–3'                               |
|----------|--------------------|------------------|-------------|----------------------------------------------|
| Cidaroid | <i>P. baculosa</i> | <i>pmar1</i>     | F           | ATGGCCGAATCGACATCGTCTTTCAACCC                |
|          |                    |                  | R           | TCAGTGAAATCTGGTTTCATTGGTCGTCGC               |
|          |                    | <i>delta</i>     | F           | AAGAACCAGGGGACTGCATTTGCAAAGACG               |
|          |                    |                  | T3-R        | ATTAACCCTCACTAAAGGGAAGTTGCAAGTAACCT<br>GACGG |
|          |                    | <i>foxA</i>      | F           | ATGGCAAATAGCGCCATGATTTACCCAAG                |
|          |                    |                  | T3-R        | ATTAACCCTCACTAAAGGGACAGCGCGTGATTTGTT<br>TGTG |
|          |                    | <i>z137</i>      | F           | ATGTCCTAGAATAAGTGGTGCCTTGCCAA                |
|          |                    |                  | T3-R        | ATTAACCCTCACTAAAGGGATAGCTTCATCGTCCGG<br>CAAT |
|          |                    | <i>thr_1</i>     | F           | ATGTCTAAGTTCAAATTTGGAGAGCCACCT               |
|          |                    |                  | T3-R        | ATTAACCCTCACTAAAGGGAGGTGTCTTTGGTCTCG<br>TTTC |
|          |                    | <i>hypp_2098</i> | F           | ATGGATTCTTGCCAGAGGCACGTTTCTGCT               |
|          |                    |                  | T3-R        | ATTAACCCTCACTAAAGGGATTATTCTTGGGCAGGT<br>CTCA |
|          |                    | <i>smarce1</i>   | F           | ATGTCTAGTCAGAATCGACGCAGCACAAGC               |
|          |                    |                  | T3-R        | ATTAACCCTCACTAAAGGGAGATGGTTTCCAAGGA<br>GTAAT |
|          |                    | <i>hesD</i>      | F           | ATGACAACATCACCTCCCGTGGACATGGCT               |
|          |                    |                  | T3-R        | ATTAACCCTCACTAAAGGGATTACCATGGTCTCCAA<br>ACAG |
|          |                    | <i>foxO</i>      | F           | ATGGTTGATATCGATCCCGATTTTGAGCCA               |
|          |                    |                  | R           | TCAGTGCACCCAACCTGGAGCAGCCATCGT               |
|          |                    | <i>hbn</i>       | F           | ATGGCAGCTTTGATAGCAACAACACCCAGA               |
|          |                    |                  | T3-R        | ATTAACCCTCACTAAAGGGAATCCGATAACGTTGG<br>GGAAT |
|          |                    | <i>nkx2-1</i>    | F           | ACCGACATCCTAACCCTCTAGAAGAAAGC                |
|          |                    |                  | T3-R        | ATTAACCCTCACTAAAGGGAGACTGAGGCCGATGC<br>CCGAG |

|                   |      |                                              |
|-------------------|------|----------------------------------------------|
| <i>runt</i>       | F    | ATGCATATTACTGAAGTTGATCACCACCTC               |
|                   | T3-R | ATTAACCCTCACTAAAGGGATCAGTACGGCCGCCA<br>CACGT |
| <i>crebzf</i>     | F    | ATGTGCTTGGACATTTACAAAACCTACAGAT              |
|                   | T3-R | ATTAACCCTCACTAAAGGGACGAGTTGAATGTAGC<br>TTGGG |
| <i>elfA</i>       | F    | TCTGGATTTACTGCTCGAAGCAGCTAATGC               |
|                   | T3-R | ATTAACCCTCACTAAAGGGATCAACTGCAGTCAATT<br>TCGC |
| <i>l3mbt</i>      | F    | TGTCCACCCCTGGGCTGCAGTGGTATAGGC               |
|                   | T3-R | ATTAACCCTCACTAAAGGGAAGTATCAATATTGCGT<br>TGTA |
| <i>emx</i>        | F    | ATGTCGGCTGTGGACTTATTCGGCCGCCT                |
|                   | T3-R | ATTAACCCTCACTAAAGGGATCAATCATTTTCTCCTT<br>GCT |
| <i>awh</i>        | F    | AGCTGTATACCACGATGAGCCAGGTCAAAC               |
|                   | R    | CAGCCCGGCATTTTATCGCAGAGGCAGTAG               |
| <i>sp5</i>        | F    | ACAGCTTCCAGAAAGTAACCCTGGCGAACT               |
|                   | T3-R | ATTAACCCTCACTAAAGGGATTCCGAAGTTACGTCA<br>ACGA |
| <i>nfat</i>       | F    | TCACGGGCAAATTTTCGTCGGAAGGACTCTT              |
|                   | T3-R | ATTAACCCTCACTAAAGGGACTTACCAGGCTCTGG<br>GATAT |
| <i>lim1</i>       | F    | GTGCAGTTGTGCGCGGGCTGCGACCGGCCG               |
|                   | T3-R | ATTAACCCTCACTAAAGGGACCACACGCCTTCGGTT<br>AGTT |
| <i>bra</i>        | F    | ATGCCAGCAATGAGCGCGGAAGCTATGAGA               |
|                   | T3-R | ATTAACCCTCACTAAAGGGACTGACGAGATGCTGA<br>TGCGG |
| <i>ets4</i>       | F    | ATGTTTTTCGACCGGCGAAGTTTGATTGTT               |
|                   | T3-R | ATTAACCCTCACTAAAGGGATCAGCAGGGGTGTAC<br>GAATT |
| <i>z246-like1</i> | F    | ATGCGGCAAAGGTATGCGAGAACTCTGGAG               |
|                   | T3-R | ATTAACCCTCACTAAAGGGATATGTCCAGATATGTG<br>GTGG |

|                   |      |                                              |
|-------------------|------|----------------------------------------------|
| <i>nfe2</i>       | F    | ATGATGGATTACGATTTTGCTGAAATGGGC               |
|                   | T3-R | ATTAACCCTCACTAAAGGGACTACATTGATTGCTCG<br>TCAC |
| <i>cebpaL</i>     | F    | ATGGACTTTTATTTCAGATACAGTTTCACGA              |
|                   | R    | TTACTCGAGGGCTTTTCAAGTTTCACTGG                |
| <i>krlL-like1</i> | F    | GTAACACAAGTGATGACTTCAAACCATCAT               |
|                   | R    | CGGTGTGCGTACGACGATGTTTGGTCAGCG               |
| <i>z246-like2</i> | F    | AGCCTTCGAATTTCAAGGCTGCTACTTTCA               |
|                   | T3-R | ATTAACCCTCACTAAAGGGATTATATGTCCAGATAT<br>GTGG |
| <i>eve</i>        | F    | ATGGAAAGAGGTTTCACCATGTTACCAACG               |
|                   | T3-R | ATTAACCCTCACTAAAGGGAAAAGTTTCTGGAATC<br>GGCA  |
| <i>z185</i>       | F    | ATGGCGTCATCTGAAGAAGCAAGTGTAAG                |
|                   | T3-R | ATTAACCCTCACTAAAGGGACCGACATGGTCTGCTC<br>ACGT |
| <i>krl-like2</i>  | F    | GCAGACGACATCGCGTCACTTGCCAGTTGT               |
|                   | R    | CGGTGTGCGTACGACGATGTTTGATCAGCG               |
| <i>hesA</i>       | F    | ATGCCTAACTGTGAAGTATACCACACCAAG               |
|                   | R    | TTATTCGTGGTGGCTCCATGGTCGCCAGAC               |
| <i>soxC</i>       | F    | ATGGTTCCTCAAACCCTTACGAACGGCCTG               |
|                   | T3-R | ATTAACCCTCACTAAAGGGATTAATTGGAATATGCC<br>GAAA |
| <i>rxr</i>        | F    | AGCGGTATGGCTTACTGTCAACCCCTGGAC               |
|                   | T3-R | ATTAACCCTCACTAAAGGGATCAAATCGCCATCATG<br>GGCA |
| <i>myc</i>        | F    | ATGGCTCATATTTTGGATACGGACTTCGA                |
|                   | T3-R | ATTAACCCTCACTAAAGGGATCACTTTAAAGACTCC<br>AACT |
| <i>klf2/4</i>     | F    | ATGGCAGCTACCTTAGCAGAGGTGAACCAA               |
|                   | T3-R | ATTAACCCTCACTAAAGGGATCACATGTGACGTTTC<br>ATGT |
| <i>creb3l3</i>    | F    | CAGAATATTCGAGAGTGGAGACACGGATTTTC             |
|                   | T3-R | ATTAACCCTCACTAAAGGGAAGTTGAGTTGGCTTT          |

|              |                       |              |      |                                      |
|--------------|-----------------------|--------------|------|--------------------------------------|
|              |                       |              |      | GATTG                                |
|              |                       | <i>atf4L</i> | F    | ATGAGCCTGGAAGACTTGACATCCTGTCTG       |
|              |                       |              | T3-R | ATTAACCCTCACTAAAGGGAACCAATGTACTTCAA  |
|              |                       |              |      | CCAT                                 |
| Sea cucumber | <i>A. japonicus</i>   | <i>phb</i>   | F    | ATGCCAGCAAGTTGTGTGACATTATCCTCT       |
|              |                       |              | T3-R | ATTAACCCTCACTAAAGGGAGGCATCGGGGCACCA  |
|              |                       |              |      | TGACG                                |
| Brittle star | <i>A. kochii</i>      | <i>phbA</i>  | F    | ATGCCTGCTAATGTCACGATGTCTTCTGTA       |
|              |                       |              | R    | TTATACGGCAATCTTCAGAGGTTGACTCGC       |
|              |                       | <i>phbB</i>  | F    | ATGTCAGTGCCTATTTCCAATCGTCGTCGT       |
|              |                       |              | R    | CTACAAGTACATGGAAATCAAATCTTCAAT       |
|              |                       | <i>phbC</i>  | F    | ATGGCGTCCTCCTCAACACCAATCACGCCT       |
|              |                       |              | R    | TTAGAGATGTCTTCCACTGATCATGTTTGG       |
|              |                       | <i>phbE</i>  | F    | ATGGAATATTACAACAGGCAGAATCTTGCA       |
|              |                       |              | R    | TTACTGGAAAACATCCATACTCTGTTTGAC       |
|              |                       | <i>foxQ2</i> | F    | ATGGCAATTTTGGACTCACCTGAGAAAAGA       |
|              |                       |              | T3-R | ATTAACCCTCACTAAAGGGATCAATTGGCAGGATA  |
|              |                       |              |      | CATAG                                |
| Starfish     | <i>P. pectinifera</i> | <i>phbA</i>  | F    | ATGCCTGCTAACGCTATGGACAGCACCGTG       |
|              |                       |              | T3-R | ATTAACCCTCACTAAAGGGATCAGTGGCGAGCAAT  |
|              |                       |              |      | GGCCAGAA                             |
|              |                       | <i>phbB</i>  | F    | ATGTCTTCTGCTGCCGTGTATCTTGAGG         |
|              |                       |              | T3-R | ATTAACCCTCACTAAAGGGATTACATGTGATGGGA  |
|              |                       |              |      | AGTTG                                |
|              |                       | <i>hesC</i>  | F    | ATGATTGCCAACATGATGCACAGCACTGCA       |
|              |                       |              | R    | CCAGGGTCTCCAGACATTCTCCTGGGGGAC       |
|              |                       | <i>delta</i> | F    | ATGGGTCGGTTACGGCTCTCCTGGAGATAT       |
|              |                       |              | R    | GGCGGTAAGCTGGCACTCAGTCAGCTCAGT       |
|              |                       | <i>foxA</i>  | F    | ATGGCAAACAGCGCCATGATCTCGCCCAAG       |
|              |                       |              | T3-R | ATTAACCCTCACTAAAGGGACATGTTGTGGTTCGCT |
|              |                       |              |      | GTGG                                 |

## Supplementary Figures

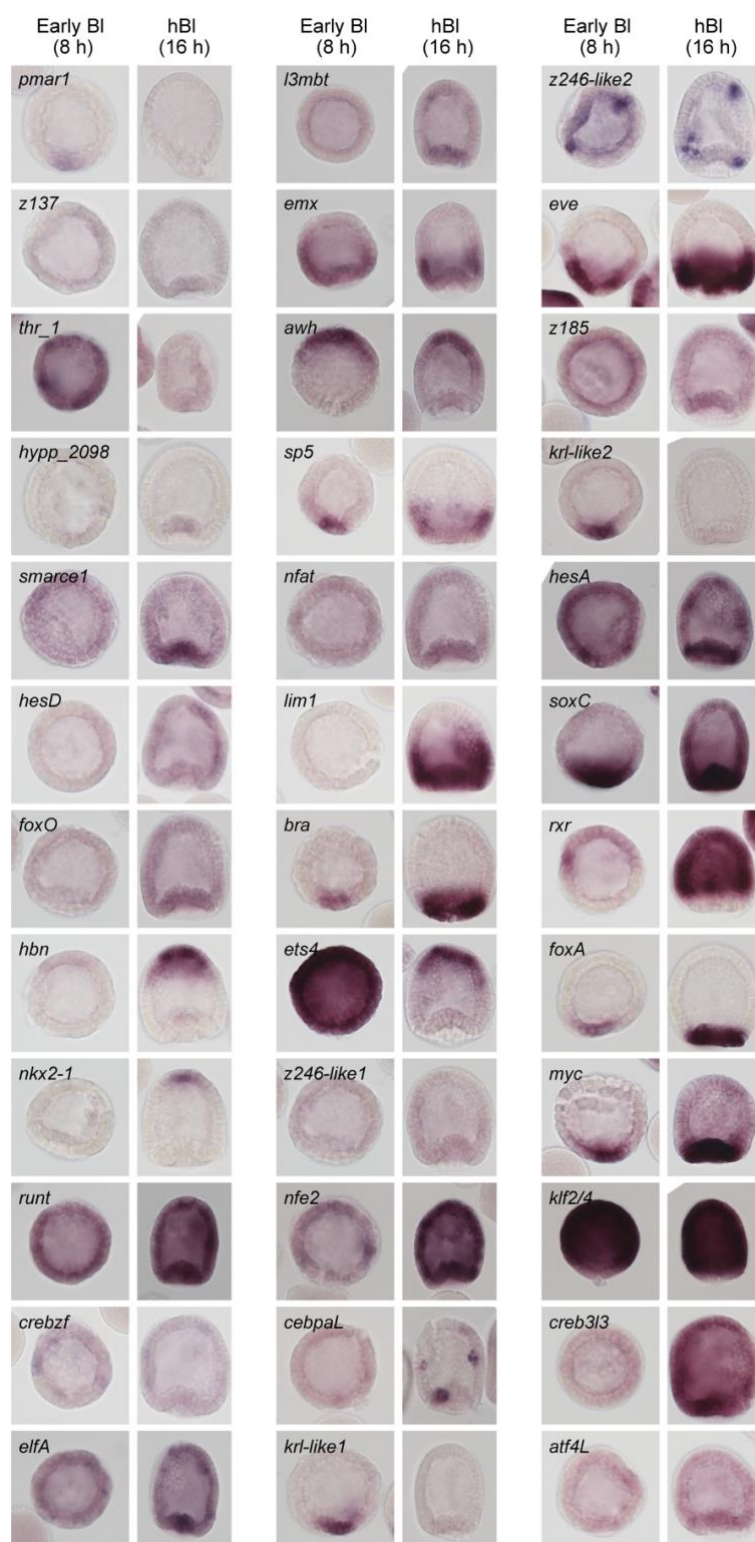

**Fig. S1.** Expression patterns of early expressing candidates of upstream regulatory genes in *P. baculosa* embryos.

Expression was examined at the early blastula (8 h) and hatched blastula (hBl) stages (16 h) of *P. baculosa* embryos by WMISH. The putative gene names are shown in the upper left corner of each image.

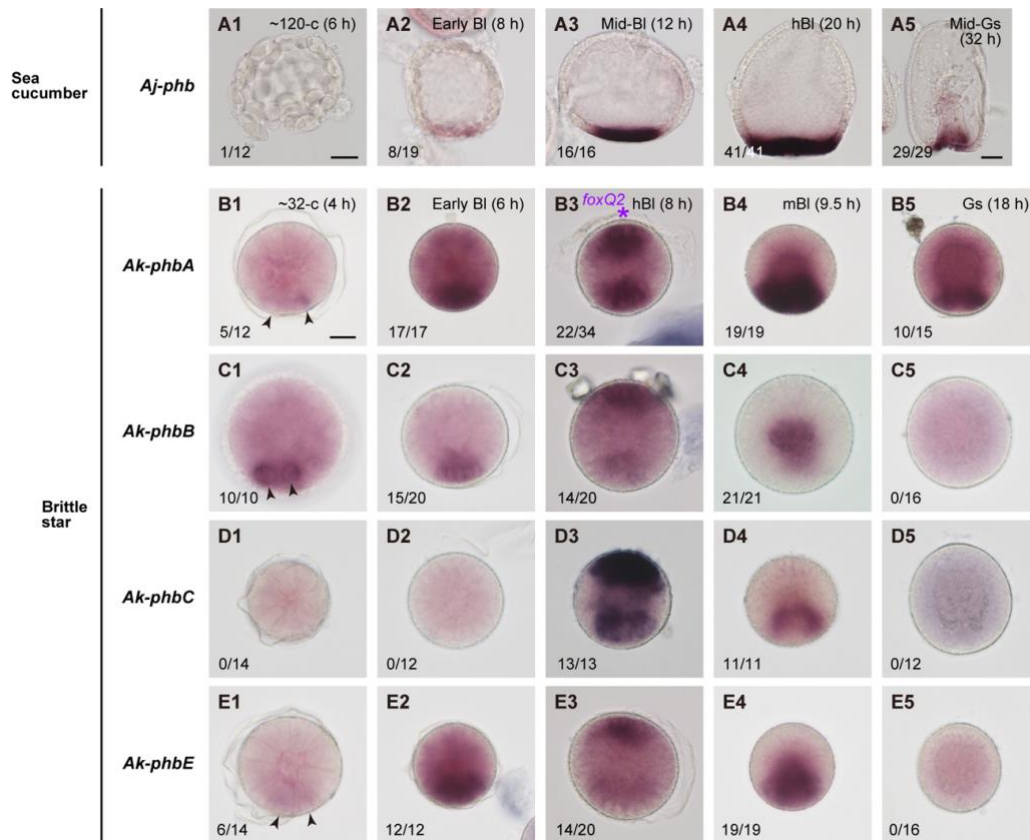

**Fig. S2. Expression of *phb* genes until the gastrula stage in sea cucumber and brittle star embryos.**

Expression patterns of *phb* genes were observed by WMISH. (A1–A5) Expression of *A. japonicus phb*. *Aj-phb* expression was detected from early blastula (8 h) at the vegetal pole. In the embryos at the mid-gastrula stage, the signal was detected in the region encircling the blastopore (A5). (B–E) Expression of *A. kochii phbA* (B1–B5), *phbB* (C1–C5), *phbC* (D1–D5), *phbE* (E1–E5). (B3, C3, D3, E3) The WMISH embryos using a mixture of RNA probes for each *phb* and *foxQ2* (animal pole marker). Although the spatial expression patterns of brittle star *phb* genes were slightly different each other, all genes were expressed at the vegetal pole. The expression of *phbA*, *phbB*, and *phbE* was detected in several blastomeres at the ~32-cell stage (indicated by arrowheads). At this stage, 4–8 cells per embryo expressed *phbB*, which exhibited the strongest signal (mean±SD=6.43±1.51; n=7). By contrast, no *phbC* expression was detected until the early blastula stage (6 h). *PhbA* continued to be expressed until the gastrula stage, whereas expression of the other genes disappeared until gastrula stage. (F, G) The numbers shown in the lower left corner of each image indicate the numbers of embryos showing WMISH signals in the examined embryos in one or two batches. Scale bar indicates 50 µm.

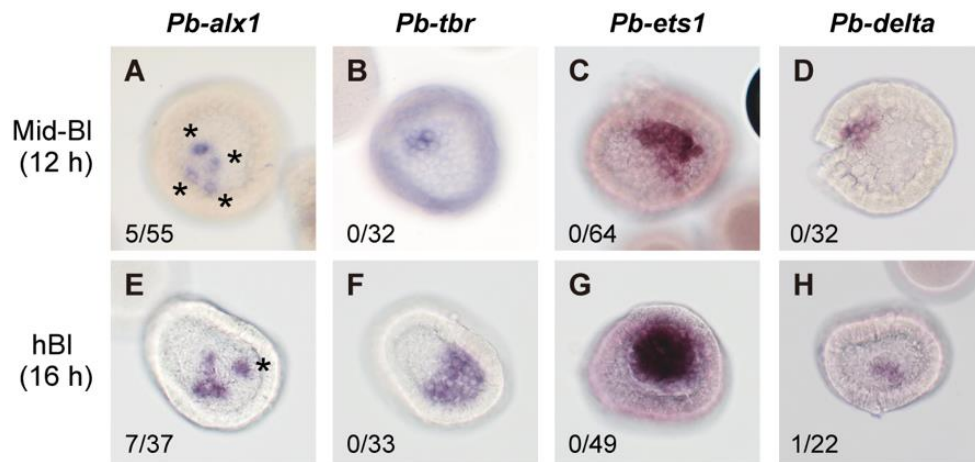

**Fig. S3. Characteristic expression of *alx1* during the early developmental stages of *P. baculosa*.**

Expression of *alx1* (A, E), *tbr* (B, F), *ets1* (C, G), and *delta* (D, H) during blastula stages in the cidaroid *P. baculosa*. All images are of vegetal views. (A–D) Mid-blastula (mid-BI) stage (12 h). (E–H) Hatched blastula (hBI) stage. The number shown in the lower left corner of each image indicates the number of embryos showing patchy expression (asterisks in A and E) in the examined embryos. The numbers of embryos are obtained from experiments in two batches. Scale bar indicates 50  $\mu$ m.

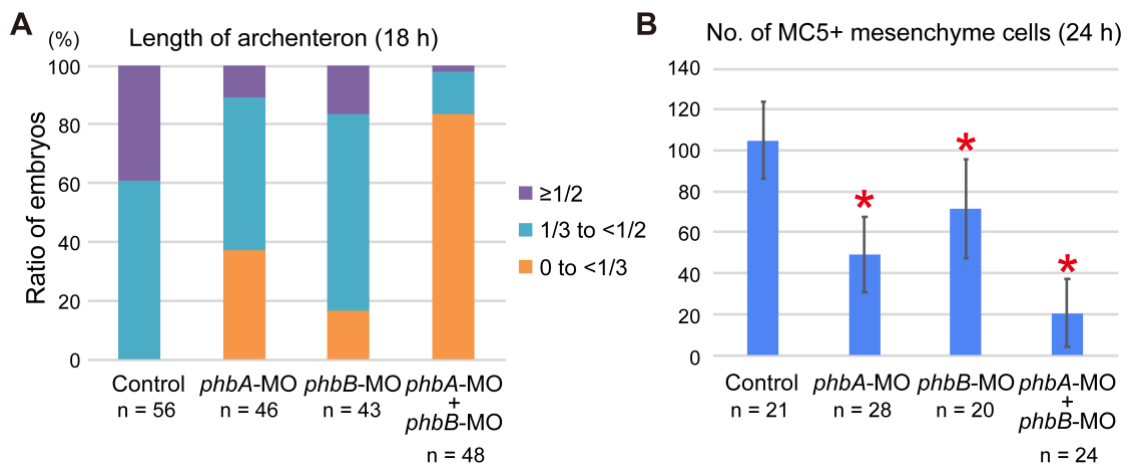

**Fig. S4. Observations of archenteron and mesenchyme cell formation in the starfish *P. pectinifera* embryos injected with morpholino antisense-oligos of *Ppe-PhbA* and *Ppe-phbB*.** (A) The ratio of embryos with various archenteron lengths ( $<1/3$ ,  $\geq 1/3$  to  $<1/2$ , and  $\geq 1/2$  of embryo height) at 18 h. (B) The average numbers of mesenchyme cells expressing MC5 antigen were examined at 24 h. Data are mean  $\pm$  SD. The results of (A) and (B) were obtained from two batches. Red asterisks indicate the significant decrease when compared with control embryos ( $p < 0.05$ , Mann–Whitney U test).

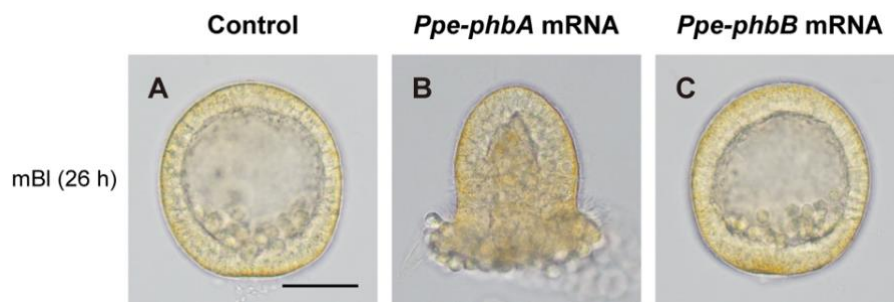

**Figure S5. Overexpression of starfish Phbs in the euechinoid *H. pulcherrimus* embryos.**

(A) Control embryos injected with 0.2 M KCl. (B) Embryos overexpressing Ppe-PhbA, and (C) embryos overexpressing Ppe-PhbB at the mesenchyme blastula stage (mBI, 26 h). *Ppe-phbA* mRNA-injected embryos formed more skeletogenic cells, although animal blastomeres did not develop into skeletogenic cells, in contrast to sea urchin *Pmar1* overexpression. The scale bar indicates 50  $\mu\text{m}$ .

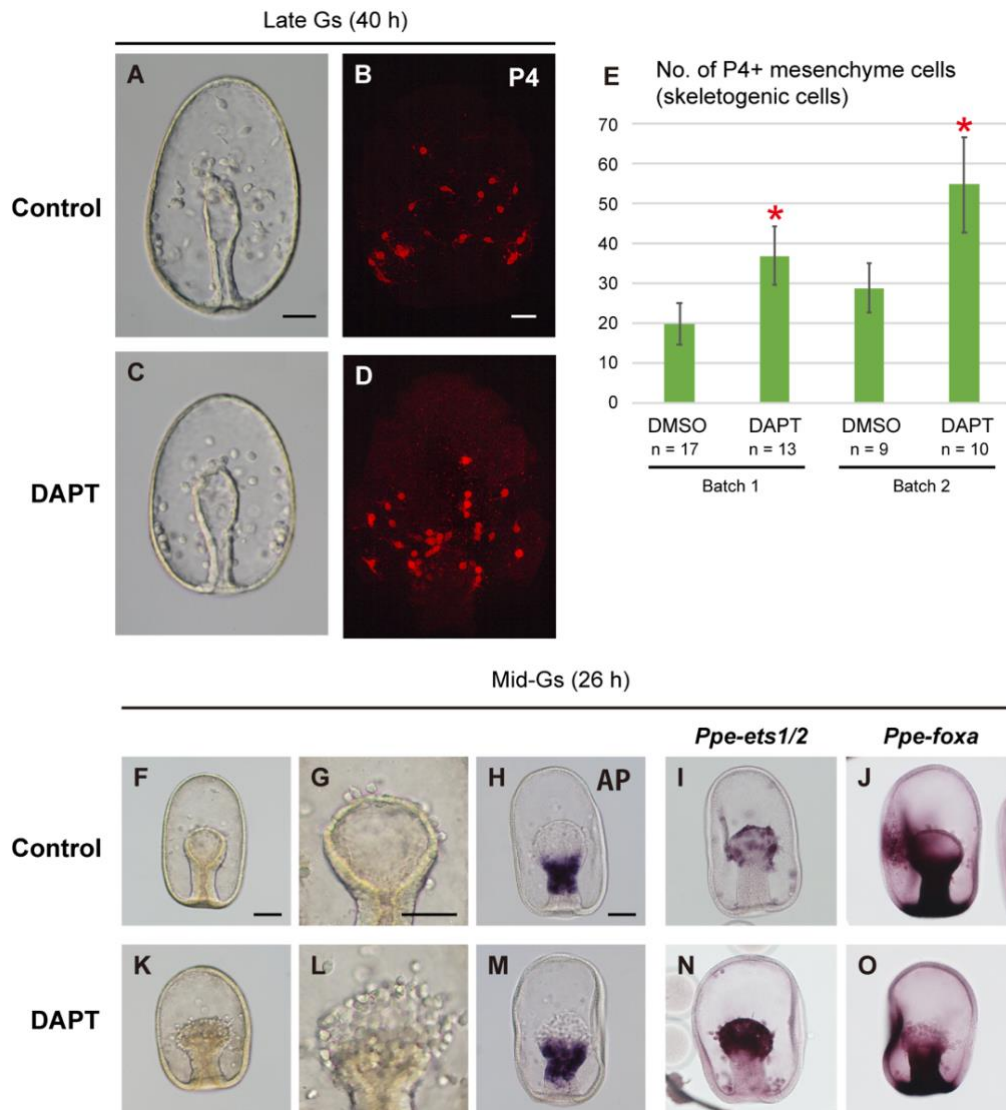

**Figure S6. DAPT-treated cidaroid and starfish embryos at the gastrula stage.**

(A–E) Observation of the morphology at the late gastrula stage (40 h) of *P. baculosa* embryos. (A, B) Control embryos treated with DMSO. (C, D) DAPT-treated embryos. (B, D) Fluorescence images of embryos examined by immunohistochemistry using the skeletogenic cell-specific P4 antibody. (E) The numbers of P4-expressing mesenchyme cells (presumptive skeletogenic cells) were counted in the experimental embryos of two batches. Data are mean±SD. Red asterisks indicate significant differences between control and treatment embryos ( $p < 0.05$ , Mann–Whitney U test). The number of P4-expressing cells increased in DAPT-treated embryos. (F–O) Observations in *P. pectinifera* embryos. (F–J) Control embryos. (K–O) DAPT-treated embryos. (F, G, K, L) Living embryos. (H, M) Embryos stained for AP activity. (I, J, N, O) WMISH embryos hybridized with *ets1/2* (I, N) and *foxA* (J, O) probes. When mesenchyme cells began to

ingress from upper part of archenteron in control embryos (F, G), a large part of the upper archenteron developed into globular mesenchyme cells in DAPT-treated embryos (K, L). The lower part of archenteron showed AP activity in control (H) and DAPT-treated embryos (M). The *ets1/2* signal is stronger in DAPT-treated gastrulae (N) compared to control gastrulae (I). No difference in the expression of *foxA*, which is expressed in the endoderm and stomodeum regions, was observed between control (J) and experimental embryos (O). The scale bar represents 50  $\mu$ m.

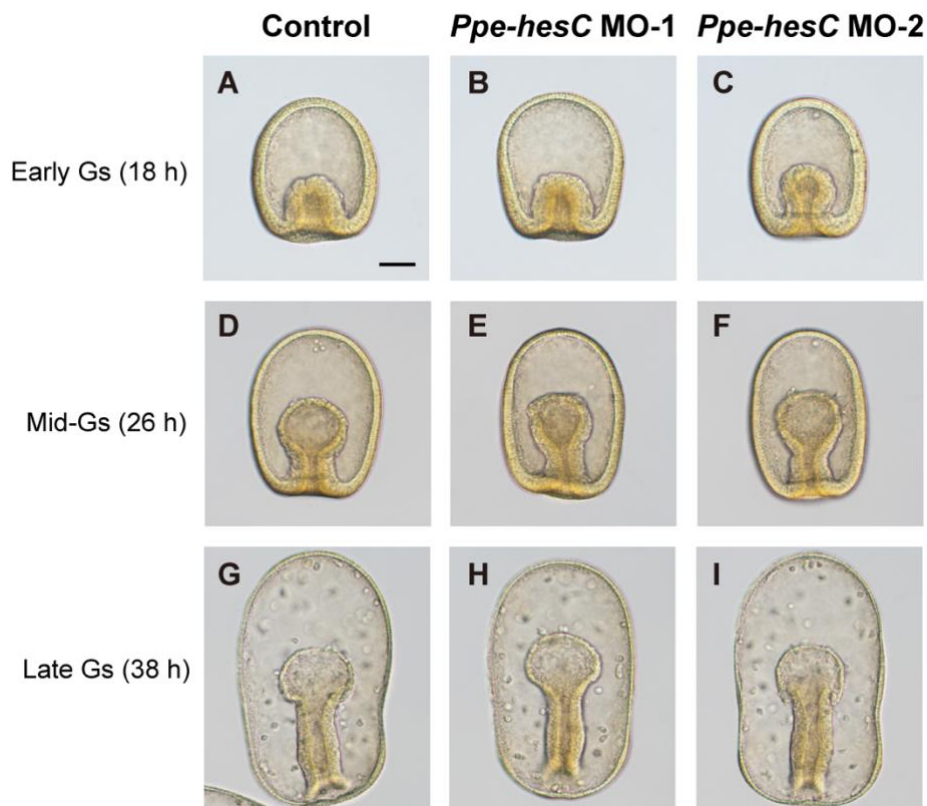

**Figure S7. Knockdown experiments of starfish *hesC*.**

(A, D, G) Control starfish *P. pectinifera* embryos. (B, E, H) Embryos injected with *Ppe-hesC* MO-1. (C, F, I) Embryos injected with *Ppe-hesC* MO-2. Embryos were observed at the early gastrula (A–C), mid-gastrula (D–F), and late gastrula (G–I) stages. No visible defects in the endomesodermal tissues were observed in the knockdown embryos. The scale bar indicates 50  $\mu$ m.

**Supplementary Data****Data S1**

**The assembled reads for early regulatory gene candidates obtained from the cidaroid *P. baculosa*.**

**>Z137**

CGCGAGCGCAAAGCAAAGAGGGGTGGAGCACTTTTGTGGATGAATCATGGCTTTACAAGTCAC  
 CCCACCCTTTCCGACTAGCATGGAGCCTCAGAATTGTAAATACGGCCTCAGAGGCAAGAAGCAA  
 AAAGGAGGGCCGCACACATACACAGACTGGACATTCTTCGGCGTAAATGTTGGACTTTACGAA  
 ATTCATTTTTGTGCAATAGGCCACCACATTCGCATTACCAGTACTGATACACACAAGGAATTGAAA  
 CGTTTATCACTATGCATCCGAAACTAAAGGCTTTCATGAGAACGGAAGCGATGGAATGTGACGTT  
 GAGGCAACGCAAACCGGTTGTGGCGTTGGCGGGGCGGAAAGCGCTTCGGAACCGGGAGAGG  
 ATGCTGCTGCAGTCGCGACGGTACCAGAGGGCGACGGACTGCGGGCTGCAGAGGCTAAAGTC  
 CCCGAAGGCATGCCAGAGCATGCGGCCGACTGTGATTCGGCAAAGGGTTCCGTGATGAGCAG  
 GAGGCGCAGGAGGAGTAAGAGCACGAAGCGAAACTCCGACGACACGAGCGGGCAGATGACG  
 GATGACGACATTGATACGGACGACGACGAAAAGTGGTGTATCAAAGGGGTAGCGGTCTTCACA  
 ACGCAAGAAGAACACGACGCTCAACAGAAAGCGAACTCCGAGAGCATGGACACTGAAACAAA  
 CGGCAACAAATCGGATCTTGTTAGGCAAGGTGACAACTTCAGTGGCAAAGAAATCTTGAGTG  
 TATTGGTCTACAGGAAAAATGTCCTAGAATAAGTGGTGCCTTGCCCAAATCACTAGCTACAACA  
 CCTATCCGGCTTACAGCTCGACGCCAGCTTTGCGTGGCATTCTTGACCCCTGTTGCCGGTAACT  
 TTGGCTTCAAAATCCAATCATTACCTCATGCCTACACCGTCACCAATGAGGTGGATATGGAT  
 ACGGGAGAGAGTAATTTACCGTCGACAAATGAGCTGTGCTCGGAATCTGTTGATGCAGAGAAG  
 AAAGATAGTGAGATGGTGAGACAAGAGCATATGAAAGTGTTCAGAAAGACAACTAGGTCCA  
 TTTCACTCACCAATAGTATAGGCGGTACCCTGCTCGGTAGGACTGCTATATATGCACATAATCCCT  
 TCACTATCGCTAGCAGTATACCATTCGTTGTTAAAGCGGAACCGGTATCATGTCGACTTCGTCCA  
 TCGCGTGTAATCGAAACAGTCCGATAGCGGGTCAGACATTCACCTCGCTAGCCCCACCCAGAAT  
 GGACGAACTTTTGAGTATGTTAGCCCGGTTGCCAGCCTTCGCGGATGGAAGCGTTACAGCGAA  
 TGCATCTGGAGGATTTGATGAGAATGAATTTTTTGCCTTGCAATCGATTAAGCAGGAACACTCT  
 CCACAGTACCTTCCCATCAAGCCTCTACACGGTGCAGGCCAGCCACCCTACTGCCATCTACCCCAA  
 GCCAGAGCTGACCTCGTTATCAAACCTCAACGGCGCCCCCACTAAGTTATTACCTGCCACCAAT  
 GCGGCGCCACGTTTAAACACCGTCACCACGTGGTGCCTCACATGCGAGCTCACACGGGCGAGA  
 AGCCATTCCGCTGCGACGAGTGCGGTGCCATGTTGCGACGGAAGTGCATTCTACCAACCACAT  
 CCGGACCCACACCGGCGAGAAACCGTACGTCTGCGCGGAGTGCGGCGATGCGTTCAGTCGCAA  
 GCACCACCTGGTCATCCACCGTCGCACGCACACCGGGGAGAAACCATAACATCTGTACCGTCTGC  
 GCCACGGCGTTGCGACGCTCTACCATCTGAACCGGCACTTAAAAACACACCTGCTGATGCCGA  
 CTCGTGTGCCATTGCCGGACGATGAAGCTATCGACTTGTCGTTACACCCGACGTCGGACCCCAA  
 CGAAGCAGTCGATCTGAGTATGCATAAAGTGACAGCTGATGTCAAATCGCAACCTGAGGTAAC

GAAATAAGCCTTAAGCAGAATGAGGAAAATCACATGCCTCGTCAAGAAGTTATAGAGAGTTAAT  
 GGTAGTAGTGTTAAAAAGTTAATAGTTAACTGTGGATAAAATCTCTGAGGTTTTGTGAATTTATAA  
 AAACATTCTCCCACTGTATGCAACCACTGCAACTGAAATTTAATGGAGATATGTTGATAGAATTTG  
 TTAGGGTCAATTTCAAGTAGTGATAAATTTATATTCAAATAGTACATGCAATTTATGTTGTCAATCA  
 TTCACCACAACCAAAGTTATTCAAAATGTTCCATGTATGTTTATCATTGAGTAATTGCATACAATAC  
 ACTGCCATTTGTAGAATAATAATACTCTAAAATTACATGTAGCCTACAAGTATTGAATTAGAAAC  
 CATTTATTGTGTTTACCATGATAATGGCTGAAAGGTGAAATATGTTTAAGGTGAATTGCTTAGAAT  
 ATTAAGTCTGCATTTGAAGCTCTTTGTACTGATATTCAATAAATCACGCTGTACCAGAGTTGTGTC  
 CAAAATAAATTCGTTAGGGTTCAAATGGTGCCTCGGACTGAAACCGAGGCCAAGGCCGGTC  
 TCGGCTACAACACTGCACTGTGCAAGGTACAACAACAAATGTTGATATCCATTTGTGGGAGGTA  
 TATAATAATTTCTGTTCCTGTAGATGGCATAAATCCTCTGTGGAAACAAGTAGTATGTGAATGTT  
 GGATAGCCACATTTGTTAATTGATACGGTAAGTACTGTAGATTCAGAATTGAGTAAAAAAAATA  
 ACCTAATACGTAAAATTGTTCTTTGTTTGTATGATGTCGTCAAAACATATCTCGTGTGAATGTGG  
 GATAATGATATATCGTTACCCTCAACTGGATTGCCTTGTTTGTGTGTCAATGGATTTAGTGAATTGA  
 ATGATTTTCTGAAATTCGTATCTGTTGTTAGCAAATGGATATCCAAATGAATGAGTGCAATGTTAT  
 GGACATCTCAGAAATAAAGTATACAATTAATGTGTTACCGGTAGCTTTAAAAATGAATACAGATC  
 AAATTCTGTAGATGTTTGTGTGGAAGTGTATGGACTTCATATTGGTACAAAGCAAATTTACATG  
 GCTGGAATCTATTTTATAGATACTAGTATAAACAGAAAGACAACCTCGTGAATAAATGTAACTCATT  
 CAAGTAGTACTTTAATCAAACCTTTTATTGAATATTATATAATGATAAATAATATGATGATTAATGTC  
 AAATCTATTTCAAATCATTACTCGCAAACAATGCATGTTGTGACTTCTTCGGTGAAATGGGGA  
 AATATGTCTACATGTTTACAATCAGCTATTGATCCTTAATAAACATCTTTAGAGGACCAGAAATTAT  
 GTGATTCTGAATTCTGACCATATTGTATTGGAAGTATCTTCCAAAAAAGGGTATGCGGTTACAGT  
 G

#### >thr\_1

GGTGTCTTTGGTCTCGTTTCGTTGATGAAGTGTGAAATGCAGTGAGAAGGCTATCCTGAAGGG  
 CTTCTACCAGCTTAGGTTCTTCAGTCCTGGGCGATCTCCTGCTATTAGTAAGACGGCTGCCAGG  
 AGAGCCATTTCTGTCTCTGTGAGTTGTAATCTTGACATCCCGACGGCAAAATCGAAGATTGGTTC  
 GATCAGTTTCGCTCAGCACCCCATGCGTCATTTCCGATTTCCCGACCCGGACCCATTAGACAGGA  
 GCAGCTTCTGGGATTCCGGATCAAACCTTCTGGGCTATCCTCAGACACATGATTTCCATGCAGCAC  
 GTTTTCAGGAGTAAACTTGATCATCGTGATGCAGTTCTGTGAACCCTGGCACCCGCTTGCCAA  
 ATTCCACAACCTTTGACAATAGAGGGCGTCATGATCTCCGCCAGCGGTTTGTCTGCTTCCAGTTTC  
 TGTCTCTTGGCATCAGGCTCATTGCTGCAGCCCTCTTCACTTGAACATGATACCCTCCTGTACATG  
 TGGCTCGTCTGTTTGTGTGCCACCACGATGGCTTGATGAGGCTCTCTTCATTGTCTGTGAGTCTG  
 TTGTGTGCCACCAAGTCCGCTCTGTGCGAGCATCTCCTCCCGGCTTCGCTTCTACGATTTTCTG  
 ATGAGCCGCCTCTTGGCCTTGCCTGATTCTCGTTGAGTACCAAATCGGGGGCCATGCCAACGG  
 TTAAACATTTCTTGTAGCGACACTGCTGGCACTGGTTTCGGGTGGTTTTGTCTATGATGCATTCT

CATTCCACTTGCAGTAGCTCAACTTCTTCTGTATTGTCCGTCGAAAGAATCCCTTGACCCCT  
CACATGTCATACACCTGTAGTGGTAGCCTGTGGCCGCATCTCCGCACACAACGCACGGTTCTGGT  
CCATTTGTCAAATCCATGTAGCTGGGAATATATGGTGCTCGTTTCTCGGAACCTTCAGGTGGCTCT  
CCAAATTTGAACTTAGACATTGTTGACTTCGGTGCAGGAACTCTGCAGAACGGTACGCAGAAA  
ATCGCTAATGTCTGTGACGGGTTATAAAATCGAAATTTAGCAAAGTCCTTCGAAGTCGAAGATA  
ATAAACCTGCACAGCAAGTTTACGGACGGCCAATCATCAGTTTACCAATTGGGATTTTGAGTCCG  
CGGCGTTTTACATGTGACACAGGATCTTGTCTTGGGTATTACAATAACTTCGATCATGAGACTTC  
TCAGGTGTTCTTTTTATCAAATGCAACACGTTACAAATTATAGTATTTGAATTTGTAAAATATTTG  
CAGAACTGAGTCTGAGAACTAACTGTCGAGATTGTGCCTCGGACGTGGTCAGAACTGATCTGT  
ATTTTCCGTTTCAGGTCACCGTGAGTCCAAGCACTCGTTGACCACACTCACTTCGGC

### >hypp\_2098

GGAGAACCAAATAGACCCATTGGGGTAGGCAGGCACACGCCGTTTACTCCGAAGCGTGTTCCG  
ATGTGGCAAGCATAAACGTGAATAATTCTGTGGAGTATTGCCTGTATACCTCCCCGGTATACCTCA  
CGTCACATAAGAGGCCATTAGTGTTGGTGGTGCTACCGCGACAGTAGCAGCCGTGCTACCACA  
AGTGGTTGGTATTCTGCGGTGTGTATTGGATTACCAAAGATAACACCTCCCCATTACGGAGTAC  
ACATACAAGCGCGAGGGAGGGTCGGAGTCAACAAACCCAGCCTACAATGACCCGTGGTGCA  
GACCACTTGTTTCGGCGTGGGAGCGACTAGAAATACTATCCCATTTCGAAATATTCACGAAATAT  
AAATTACGGTTTCCATGGATTCTTGCCAGAGGCACGTTTCTGCTAGAAGACTGAGAGTCACCTG  
TCCTACCAACACAAGTGATCTTTTACAAACGAAGGCTGAAAGAAGGCGAACTTCATGCAGAACAA  
AGGAAAATAAGAGTATGCGAGAGAGTCACCACCGTTCGGCTGAAATTCGCGGCACTCCACAC  
AACAGTGCCGCCGCCACCACATCCACCAAGATGGAGAGGGTCGAAAGAAGTCTGCTGGAAGT  
GCTCAACTTCTCGGCCTCCAGACTATTGGTGTAGATGAGGCAAGTCTCCTGGAACGACAATAG  
CGTTCATCAAAGCCTACCAAGATTCCGCGACGAGCGACTCATCACAACGTGGAGGTCGCCATAC  
AGGAACTAGCTCTAGCAGCGACTCGGCGATCCGTCAGTCCGAACAAGCAGCACCGGCCTCCCC  
AACTGACGCCATATTGGCTGGTTTTCAAGATTGTATGGAAGAAACCATTTCGATATCTGGTGGACG  
TTGAAGGATTTTTACCCGACGACGAAGTCGTTGTAGGACTCACTTCCCATCTGCTGCAGGCTCG  
CGCCAAATTGGACCTTAACAATGACATCACTTCATCCACGTTGAGTGGTCATCCCTCTCTTGATGC  
GGAAGGACCGGCCGAATGCGAAGCCACAACCAGCACGCAACGTCTCCACAAGAAACCAACA  
CGCACTCGATCGCCTTGTCCGATAACCGACAGCAGTCGAACAGCCGAACAGTTTCGTGGCGGCA  
ACGCGCCGCGCGGTTTGTACAAAGCCAGTACATGACGCCGCTCACTGTGATACAAACCAGTA  
TTACGCCTTGCCATCTCCCCTGAATCGCAGCGCTATCGCGTGTGCAATGAAGCCCTCGGAGTCGC  
TTCTGACAGTGGCTCAAACCTGCCCCACACCTTCGATGCCGTCTTACAGTGTTGCGTCAGCTGCT  
GGAGCCAGCATATATTCTCCGTTGACTCCAGGGCAGCTTATCAGCAACGCGCTATTGCCACAAC  
TGCCGTACAACAGTCCTATCGGCCAGCCGTGACTACGGAGGGGTGTGTTATCCCGTGCCTTCCC  
GCAGCTGTCGGCGCAGCCGAGGCCAGCCAGAGACTGTATGGCTTCAACTTGAATTATGTTGCGC  
CATATGTCGTTGCTTGGGTGAGACCTGCCCAAGAATAAAATGATAAACACATAGAAAGCCGTTT

GAAAAAGATTGCCGATTATAACAGCTGCGCCAAGGTACATGTTGACCGTGATAGACAAAAAACC  
 GACGCGTCGGTATTTTCACTCCGTTGCGACGGAGTGAAAATAATGAAATATCATACCAAGTCCAT  
 GGTAAAATTCAAGATTGAGGAGGTGCTCTTCAAGTGATTGTCTTTTGTGTTTGATAATGACGAA  
 GCAGTTACAAAAAAACCCGAGCAAAAACAACAACACAGTTTTTGCATATGTCTAACATTTT  
 ATCCTGATCAATCAACATTTCAACATCCACACTTTGGGAAATATTTCTGAAAAATATTTTCAGAGA  
 ATTTATTTCAAACAAGTATTTTTGTAACTTGATGTATTATTTACATTTTAACCGTGATGATTTTTT  
 TTAAACAAGTGTTCTTCACGCCGTCGTGTTTTGACGACTGTTTTATATATTTTTTCAGTATTTTTAC  
 ATGACGTTTGACGTATCTTTCCAGATTGATGTGCGTATAATATACAGCAAAACATATCTCGACAC  
 ATTTTGCATGTGCTTTCACTTACAGCAAACCTCTGGAAGTTTGGTAATGTGAACACAATCTTCC  
 CGCGAAACTTCCTGCGAAACTTATCGCG

**>smarce1**

CAATAATAATGATTATGGTATCAGAATAGCCGCAATAAGATTTTAGGAAAAGTCACCAAATTTGAG  
 CATAATTGGACAAAAATTATAGGAGTGCGCATCAATTTATGGTAGGGGGGCACATTGTGCCCCC  
 CCTTGGGCTTTTTAGGGTTAAGACATAGGATAAATCATGGCAGTTGGTACAATGCATCCCTCCCTT  
 AAAGATTGTGTTTCATGATTATCAGCTTATCAAGCAAATAAGATAAAATCAATCATAATGTAATGACT  
 TACATTAATTTTCACATCTAGACTACAGCCTTTGGAATGAAAAGTCAGGTTTTGTAAAATAACTG  
 CTGTCGTAATTGAAACAGAATGCAATGTCATAATGACACTAGTTTTGAATTTTACAAAGCCATTAA  
 CATAGTCTGACTTCCATGCCCAAATGGTGTATCATCTACTGAGAACTAAATACCTGATGATCAGAG  
 CTTACAAGGTTAAAACTCTCACCAGAGCAGTTGAACAACTGTCATGCAATCTGTTACTGTGGCT  
 AAATGTGGGTAGAGTTCACTGTGTTTGACCTGTTTTGCAAATGAGTGCTTCTATCTTCAACAGAA  
 GTGATAATTTAACATTTCTTTTCACTTAATCAAAGCATATTAGCAAATGGTATGCAGGAGCTCAGA  
 AGTTACAGATGTTCACTGACAAAAATTATTTTTTCCCTTGTTAACATCTAAAACGTGGTTAGTTTA  
 AAACATTCTTCTGAACATAAATACGTCTGTTGCACTGAACCTCCAGTGGATCATTACATACCACC  
 GTTTGCCAATAAGCATGTGCAACATTACTTACTAAATCTACATAATGACTTTGATCCAAATTCAA  
 GATTCCCACAAAAACAAATCGTAATCTATTCTTTGGCTCTTCTTTCTTGTCTCTTCTCTGTCTG  
 TGGATGCTGCTCTTCTGACTGTCTTTGCCAACATCCGTGCTTGGTCCCTCATCACTGGGCATCTC  
 TGCCTTTTCCGCCATCTCCTTGGAGTCGGCCGTGCACTGGATGCATCTTTGCCTCGATTGTGTC  
 GTCGTGCGTTTTGTCGTCCAGGGTTTCAAGATTGTCTTTGTCTCGGTGCCATCCTGGCTGGACT  
 GCGACTCACTTTCTCCGACGACTGCAACAGGGCATTAGGTGTCCTTGAAGCCTCTTGGGTTT  
 GCTGGACTCCAGGATGGTTTCCAAGGAGTAATCTTTTGATTTGTGATCAGATGGAGTATCATCAC  
 TCTTTGGAACAGCCCCCTTGTGCACCACCCTCCATTGGCACCTCCCCACCAGAAGGATCTTTATCC  
 TTCTGCGCTCCCTCCATCTGCGGATTGCTCCCAGGCTGCACTGGTTGGGATTGTGGTGCCAAGG  
 CCTGTGACAGATGCGGCTGAGACTGCAATTGTGGTAAGGGGGTTCGGATGTTGGAGCGGTGTAT  
 CTCGTTGATCCGTCCGTGGTCTGTCTTTGTCTGAGGCTGCCCCTGTTGCTGTGGTTGAGTCTGC  
 TGTGTTTCTGCTGCTCTGCCTGCGACCGCAGGATCCCGACTTCGGTCGGGGGTTCGGCGGAGG  
 ACCTGTGTGTTTCGGCGGCGGGAGGGACTGCATTTGCATGGGTGTACAGGATGGGCGGTTGC

GTTGGGAAGCAGGTTTCGTTGGCTGCACCGGGGGCGCTCTCTGGTGACTGGCCCAGTTTTGCAT  
 AAAATCGGGGAACATCAGCTCATCCCACTTGATCTCCACCTTCTCAGCACATAGCTTTTTTCATTTCT  
 ACTTGCAAAGTTCTCGCTGCTCTCAACAAATTTGCGCTTCTTGACTTCATACTTCTCTTCTATAAGT  
 TGCAATTCTGCTTCCAACCTTTTTCTGGTGGAGTTTCAAGGATTGAACCTGTCTCTTCAACACCTG  
 CATGCGATTGTCTGTGACTACCGTCCTAGGATCAGGTACCACGGCATCGCTGAATATCTCATTGAT  
 CAGTCTGTGATTGCGCTGAAAGCGGGCTGCCGCAATGTGTTTAACGGAGTAGATTTTCATCTTGAT  
 CATCATCGTCTTCTGCAGATTGCATGCTCATTCTTGGCTCTGATTTGACGGTATTGTCCAACCTGCG  
 ATTCTTGGTCTATTGCTTGTGGGCTTTTCCCTTCGCTACCATCCATGCTTGGTATGCCGGTGAGT  
 TGTGATAGGATTTCAATGCACGAGTGATTTCATCCTTCTCTATTTTCATATTCCTCGGTAAAACTTG  
 CTTGCCTTCCCTCCGGGAGATCTCTCCACATCTGCCAATGATCTTGCCGATCTCCACAGTTTCAG  
 GTCCTGATTGTCATTCTTTACCTTCTCCAGACACTGCGGCTGTATCTCATGTATGGCATCAGGGG  
 TTTGTCGGGAGGCTTGGGTGGTTTTGGGATACGGGAATCATGGGAAACCCCTTTAGCTGGACT  
 GCCCGACTTGTTGATCCACTAGACCCAATTATGCCAGCTGCAGGCGAGTTGGCAAACCTGACGG  
 GAGTGAGATGGTGGTGTGGGCCAGTATTTGAAAAGCCGCTTGTGCTGCGTCGATTCTGACTAG  
 ACATCTTGTGTACTAATAATGCTAGCAAAAAATATCAACTGGAAGTGGTCTGATGTATTAATTTG  
 CGGGTAATAGAAATTCGTTTGTCCAGTGCTGCACTCCGGCCAACAACGC

#### >hesD

TGCCCCGAAATTTTGTGTTTATTACAAAATGATTTAACACTTAACAGAGCCTTTTCTCGGGATTG  
 CTAACGACAACGCTCCTTCCCCAAACACCCCTTGTCAAATCTGAGGATGAAATACATGTAGCACA  
 TACTAATATTTGCGGTGCATCCCGGAAAATGTTTGTAAATCAAATTTAGTAATGACTTTATTCAACC  
 ATCATTGTAAGCCATTAAAGTGAATTGGCTTCAGAATGTTCAACACTAACTAAATTTACTTATTCT  
 GTCTTTTGATTTTCTTCTGATCATTGATTTTATTACCATGGTCTCCAAACAGGGTCAGTGTCACTC  
 GGCGGATTTCAGGAACAGGGAGATAAACTTTGGTATATTTTCTAAACCAGATGGATACACAA  
 CGTGTTTCATATTGTCCGCCATTTGTCTGTCTGAGGACTCGCCCATGGCAACGAAAGCTACTGGA  
 TATGGCATCGCAGATGCTACGGTATTTGACGATCCGCTAGGCGTTCCCAAGGCTGTGCAACCCGA  
 CGCGTACATGACGGTGCCACGTTTCAAGGCTGCGATGCAACAGCCCCTAACGGCTGGGACGCAGA  
 CTGGGATTGATGACGATCGTGACCGGGGACACCACGACAGAACCGGAACCTTCAGTCGAAGA  
 GGCCGGACTAGGAGCCGGTCCAGCGGCAGGAGGACTAAGTACCGGTATTATTGGCGCAGACA  
 GCTGACCACCGTTGAACATCTGAGATGGGACCAAAAATAAACTGACCGGCAGATTGCACCTTGAT  
 GGGGATGCCAATGGGCACAAGTCGGGTTGTATTGTTGGCGTTCCTGCCATTTGGCGCTAATTCT  
 AGTCTTGCTGTCAACCCAGGCAGTACACTTGGCGCATTACTCGCTACACTCGCTGGAACACCTAC  
 TACGGGGTGCACTGGGGCAGACGGCGTAACGGCTGCTGGCATCGGTTGCACGATATTCTGAC  
 ACTATTTCCAGCCTCTGGTTGGTTAGTAGTTTGTGGCGTACTTCCGGTTTGCAAGAAACGCTTC  
 CGCTATTGGTTGCTATGGCTACGTGTCGCTGCTGGCAGGAAAGCGTTTCGGTGAATGGTTTATTA  
 CCCTGTAAAGAGTCAGCTAGGTGGGAAAGGAGACCCGCTCTTACATCGCCGTTGAGGGAATTC  
 CGACTGTTTGTGAGAAATTCGGATACTTCGGATATGCACTCGTTGAACCCAGCCCCGAACTGTAT

TTGAGAATGTTGATCTTGATTTCTCGACAACCTTTGTTGGCGTAGTTGCTTGACCAACTTCACAG  
 TTTGCTCCAAATGTCGGCTTTCTCTCGTTTGTCTGTCGTGAGCCTCCTCCCTCGGGATTGAGG  
 GCGTCCAGTATCGTCTGTAGTTCTGTCAGACAGTCATTTATTCTGGCACGTCTTCGCTTCTCCATC  
 AACGGCTTGGAGGACTTTCTCCCTCATGGGTCCTGGTCGGTTTATCTGAAGCCATGTCCACGG  
 GAGGTGATGTTGTCATGACCAGCTGATCAAATCCGGTACGTGTGACCCTCAGAATTTAAACCGAT  
 TGGATTCCAACGCGCAGACGATACAGCAAACCTGTTGCCTAGCGAATACCGACGCTCAACTTT  
 TTTCTTCCCTCACGAGACTCATATAATCAAATCTCGTGCTTTACGAGTGATGCATTGTTTTCTCGA  
 CGTCACACGTGTATAGGGTGATTTCTGTTCTGTTCAATGTGATAAATTATTCTCCAATATACGAAC  
 AAAACCGATAAAGAAGAACTTT

**>foxO**

CGAACAACTGCAATGCACAGGGCATTAGATGCACGACGCGTACGTGTATGGACTATGCATACAA  
 GAATTACATTGAATACATGTATTACACAGTCCACATGCACGAGAATAGTGTCTAGCTAGCGAGCG  
 AGCTCGATTGTCAAACACGACACACGACATACGTAGCGTAGTGCTAGCGGACGCGTTGAGAGTA  
 CAGTCGCCATGTAACCTGGAGAATAGGTTGCTGAGAACTTTGGATGTTGTATACAGTTTTTTGA  
 TCAACAGGATTGAACTACCTCCAGCCCAGTGTTTGGATATTGTTGGTGATTTTTAGGAATTATAAA  
 CCATGGTTGATATCGATCCCGATTTTGAGCCACAGGCCGACCACGTTCTGTCACCTGGCCCCCTG  
 AGAAGGCCAGACTTTTTGGATTCCAAAACCTCCGACACTTCTGCCGCTGCTGGTGCCGCCGGC  
 GATGCTCACGGAACACCCGCTGTAGTTACCGAGGAAAGTCCAGATACAAAACAGTTTTTACCTC  
 TAGAAGCGGGTGAAAATCGTGATTTATCAACTCCAGCCTCTCAAAGGAGAAACGGATCGCGGA  
 GAAATGCATGGGGTAATTTATCGTACGCGGATTTAATCACAAAAGCTATTACAGAGTGCCCCGGAC  
 CAACGCCTTACTTTATCACAGATTTACGACTGGATGGTGAAAAATGTACCATTTTTCAAAGACAA  
 AGGGGACAGTAATAGCTCAGCAGGATGGAAGAACTCCATCAGGCATAATTTGTCGCTTCACAGT  
 CGGTTTGTACGTGTCCAAAATGAAGGAACTGGCAAAAG

**>hbn**

GCCCGATTCAATTACGAACAGAACAAAACAGACAGGATAAATATTTGTCGCTGTACAACCTCAAA  
 GGCACAAAATATTGTTGATAATAATATGCGATGGAATTATTTACAGATGTTGTGATCAACGATAAC  
 AAAGTTGAAATGTTGTACTGCTGATTTTCTATTTTAAATTAGGAAAAAAATCAAAAATACAGT  
 TTTCTGTATATTCAAAATTCGGAAAACTAAAATACTCAATTCAGAATAGTACAATCAATCAAAATT  
 AAATGCACCCAATTTGTAAGGTGACAATTTATAGTGTACGTCTTATTCATTACATCATCATCCA  
 ATTTGTTACGTTTGACAACATATTGGTAACATATTTAGGTGAAATTCATTGTTTTATATAGTTTAAT  
 TTGCGGAAAATTACAAAACCAGGATATTTTAAATCAAATGCAAATTCCAAATACATTTGTATTATA  
 TCAAGGCGTGACATAGAATGTATTTTCGATATTAACAGTTTCAAACATTTTACTGACAGAATGATAG  
 CACAAAAAAGGTTGTACTACGGGTCACTTACTCTTGTGTAAATAAAATATTACTACAATTAATCATT  
 AAAGATGTATTTCAAGAAAAAGTCAAGATGTTCTAAGACTGCTTTTGCAGTCAAATTGTAGTCGT  
 GTGCGGTAACCTTTCTTTCCACGCGTCAATATCATTATGCTATCAATATTATTGGTTAGTAATTTGTT  
 TCCGTCAAAACATTAATGCCAAAAACGATGTATTATTTGTACAAGGGAGCCAAAGTTTCTTAGT

TTATCTAGGCATACAATTAATTGTGTTTTTATGCACGTTCCGCAGAAATATTCCTTAACACATTGG  
 GGCTACTACTCTGCATTATTTATTTATTTTTTGTAAATACCATTATGCCAAGTCGACAGTCTTTCGACA  
 CAAAATAACACACATTTAAAATGTCAATCACGTGACATTATAATTATCTTAATCGATATTGCATTTCA  
 GAAAACGGTACATTAGTCATTTCTGACAAAAATAACTAAAATATATATGGTAACAAACATTATCA  
 CATATATTCCAGTCATAAGTGTATGATAATTACACCGCCACACACCAATCAAAAGAAATGCCAAAC  
 ATTTGTGTCATATGCAATGTGTCACTATAATAATAGAAAAATATAGAACATGATCGGGTTGAAATGT  
 CGGGTTGAGAAAGATTTGATGGACACATTGTTGTATACGCAGCGTAACATTAATCTTTGACATT  
 CCAATGTAATTCATTTGAAAAGAGTAATGAACTCATTAGTTGGTTGTAATAGGGTAATACCATGAT  
 ATTGTATCTTTACATTTTTTCTTAAATCAAATATTATATTAATATTTTACAGGTGTATACCAAACATA  
 AAAAAGAGTGAGGATTTGGTACGTAGAATGATGTAAATGAAATTAATGAAGTAGCCAATTCATT  
 TATTGTTATTTGTGGTTAAGTCACGAAAGGGCTAATTATTATAGTTAATTATGATACCCTCATTCA  
 AAATAAACACCGAGAGCTCGTCTGCAAAATTTTCTGTTTTTCCGCTTTTCTTCTTACATAAATGC  
 GCTAGAAGAAGAAAAGTTTGTATATAATTTAAAAACAGGCATAATATGATAATAGTTAATAGTTC  
 AAATCCATGTTCTAGACGTATTGCTTGCGCGCATAATCGCGCAATTGAGATATTTGAAGCTGATA  
 GTTGTACGAGGAAGACTTTTAACCACAAATCTAACTTCATGACGAAACCCCTGAGTCCTGAGCA  
 CCAAATAATCAAAGACACTTTGAACCTTTTAATAGTCTTCGTCCTTTAGTTTGTTCATGATCCGAT  
 GCCATGTATGTACATGCTTCAATCCGATAACGTTGGGGAATTCGAAGGTGAGTGTTTAAGTCGA  
 CGTGGTGAAGTTCCCGCGCTTTTGATCTCAAAACATTGATACTTTTCTTTTTCTGGCCTCCTCTT  
 CCATTCTACGTCCTTTCTCAGCAGGCGACATGTAAACTTTGGCACTGAAAGCGGCAACGTTGG  
 CGGTTTCTCGGCTCCCTGAGCCAACCCCATCCACGGAGCGGGGTCGAACATTTTCATACCGTTA  
 GCTGCCGCTACAGCCGCGGCCGCCGCGGCGGAAGGCAACCCGAAGTGGCCGTTGACGGGCAT  
 GACGTTGCCGAGGTACGGGTGCGGCAGCCAAATGGCGGGGTCGCCGGGAGCGGTAATCCAA  
 AACCATTGCTATGAAAAGGGGCACCCCTACCCGGACGGGTCATCAGAGACGGGTAGGACTTCT  
 CGAGTGGGTGTAACATGGCGTCGCCTACGGGGGACATGTTGGCGGGGTAGGGTTTTTGACCGA  
 AGTAGCACGGACTCTCACGGTCGAGGAGCTTCTCCTTTTTGCGCCATTTTGCTCGTCGATTTTGG  
 AACCAGACCTGAACTCGGGATTCACTGAGGTCCAATCTCAGTGCCAGCTCTTCCCGCATGAAGA  
 CATCCGGGTACTGCGTCATTTCAAACGCCCTCTCTAGTTGGTGGAGTTGGAAGGTCGTGAACGT  
 CGTCCGCGATCTCCGCAGCTTTGCGGCCGACGACTCCGAAGTGCAGTCGTGAGTGGACTTCG  
 GTCATCTCCGGCGTCCGTTCCGTGGTAGTCGGGATCGATCGGCGAGTGTGTGATGTGGGGAA  
 ACCGTAATGGGCGGGTGGACTGGTGGAAGTGGGAGAAGAGATGCTGGATAAGGAAGAGACG  
 ATACACCTCGATTGTTGCTTGGGACTCGAGGCGCTGAAGTTAGCCGACGCAGGACGGCTTATGT  
 CTTTTGGTGTGTCATTGATTTTCTGTCACTGCTGTCCCGTCGTCAATATCATGCACCGATGCAT  
 CAGTATTTTGTACCCCGGCCGGTTCCCGGTCCTTGTGAGTCGCTGATCGCTTGTGCTGCCGGTATCC  
 GCCTCCGCTGCATGACGGCCAGAAGGAAGTCGATCGAGTAATTGCTGGGTCCGTGGCAAGAA  
 CTTTTGGTGATTGTCTGCGTGCTTGAAATTGAAAGATTGTCAGATACTCTGGGTGTTGTTGCTATC  
 AAAGCTGCCATGGCTGTGAGGTTTAACCAATTCTATGGAACCACTGGCGATGTGTGGTCTACTT

GTTTGACAGAGAACATCAAGTTCGAAAGACACCAACCTCCGATAGCACGCACCAACTCGCAGG  
 ACGGTAAAGAATTGAAAATAAGTCACCGAGAAGGTTACCTCGAGTTATTACACACATAGGTGG  
 AGAAGACAAGTATTGTATCAACCAAGTAACGACAATGCCAGGATACATAATTAAATCAAACTGAA  
 TATTCAGATTGATTTTACCAATACGGTGGTGTGTTGCATCGACGACCAGCAAATGTAGTCTGAAT  
 GGTAAGTCCGGGAAGGAAAAGCTTTTTTACCCCAGCTCGATCAGCGAGCAGCACGCCTTTTTT  
 ACGCAGACGACAATTTTCTGTTTGTGTCAAACCTGCGGGCAGATGCCAATCATCGTACGGAAA  
 GCGCCAACTACTACAGACCGGGTCCCATTACGATTGGATCAGCTTTGTGTGCCGAACAATGATA  
 GATTAGTGGTTAGAAAGGCATTAGCCATTCTCAGATTCTAACTGGCATCTAGGTATTTGCGAATC  
 GTCTGCCGAAGGTATAAGAAATCTTCTGCCGATCAACCGAACAAAGTGTG

# **>nkx2-1**

GACACGGCTTGCAGTGCGCATTGTCATACAATCAAAGAAGGCGTGCGCCTTACACATTGCCCCG  
 ATATTGTGAGAGCCTGCGGCGAGATAGCAAAGTACGTCAAAGAGAAAAAGGGTGGCCCCCTATT  
 TTTTCTCTGTCTTACCAATTTTCCCTTGTTGCTTCGACGGAGAATATGGTCCATGCAGTCGACGA  
 TTTTGTCTGGCAGACACGCATCGCTTAACACATTGCCAAACGAGAGCGTGACCTGACATAAGG  
 ACCAGGCGATCATCCGTGATTGTATTTGCCCCAGAACTTACTGCCTGTGGGACACTCAACTGGT  
 CCTCTCCCTCCTCGTCGTCTACTAGTGGACTCATTATTGCTTGGCTCACTCCAGGAAAGAGAGA  
 CTCCAACGATAAGCCTACTCCAAACGGGCCTCTTGACGGGATACAGTGACACCGTGCTTGGGC  
 GTCATCTATGTTTCTTCAAGACATGTCCTATAGCCCCAAACAAACCACTCCATTCTCCGTACCGA  
 CATCCTAACCCTCTAGAAGAAAGCTACAGGAAGTCTATGTTGGAAAGCCCGGGCTCTAACTTC  
 ACTGCTGTTCTCCCGGCCGCGGCAAGCATGCAATCAGCCTACCGGTCCCCTCAGCACTCGGCAC  
 ACCAGGGTATGCAGGTCTCGCCCATGAACATGGCCACGGCCAACAACCCATACACCCACATGCA  
 CGTACCCCAACTCTCTACCCGAATTACTGCAACGGGTCCGTGCGAGATCTCACACCGCACTATG  
 GCGACCACCGGGCCAGCGCAGCCGGATGGTATGGCGCCAGTCCCGACCCTCGCTTTACCATTTT  
 TCGCCTGATGAACCATTCGTCCACAATGAACATGAACATGAATATGAACATGAATATGAATATGAA  
 TATGAATATGTCCACGCTAGGCGCAGTTGGAACCTGGGGACCTGACAAAGCCTTTGTTACCGTCG  
 ACTACCGCCGAAAGCGCCGGTACTCTTCTCACAGGCACAGGTGTACGAGTTGGAGCGGCGC  
 TTCAAACAACAAAAGTATCTCTCGGCACCTGAGAGGGAACATCTGGCCAACTTGATCAACCTGA  
 CACCCACCCAGGTCAAAATTTGGTTCCAGAATCATCGCTATAAGATGAAGCGACAGGCCAAGGA  
 AAAGAACATGCAAGAAAACAACCTCTCTTGTATCAATCTCCGAGAAGGGTGCCTGTACCTGTC  
 TTAGTCAAGGACGGTAAACCGTGTATGGCACGAGTGGAGGAGGAGGGGATGTACTGACGA  
 GGATGAGCGAAATCTTGGTGACAATGTTGATACCGCGGAGCAGGGCGTGGTGGGGAACCCCC  
 AGCAGTCGAATTCGGCTCAATCCTTGTGCGAGCAACAGAGCAGTAACAACAACGGCCACCACC  
 CGACCATGAAAACAGTCCCGTCGAGCCCAGCTCGTGCGTCGGGGCCGGTATCCCCCTCAGCAT  
 CCCATCCACCGACTCGGGCATCGGCCTCAGTCCCGTCTCCGTGCACTCCCATCACCAACATCCTC  
 AAAGCCAGGCTTCTCTCCACCAGCAGTCGAGTGCCATGCATAGTCTGTACAGCCCCGGCGGGG  
 GGGCGGCATGAATCCGAACGGCGCCGTTAATAACATGTCCTCCACTGCGCCTTCTCTTCTACACG

GCAGAACGTGGTGAAATGAACACATGCTGGACACAATTCGCCCTAATTCACCCCAAGTACTCT  
 TTTACATTCTACTAAATTTTGTGGTACTCGGGTGTCTCCGAAAACATTAGGCACACGTCAAATGA  
 CTCGAAAATTGTGATTTTTCACAACGTTTCATGTCCTATTTATTTTCATCGCTTTGTTTATTAGGAAGT  
 CTATAATGTGAACGTGAACTCTCAGGTAAATGCATGAAGAGAACTTTTTTTGGATTATGCATTCCT  
 TACTGGACGTTTTTCATGAGATGTATCTTGTGTGTATGATAACGTGATCAACACTTTAATTTGTTTGT  
 AAATAATAGCTCAAATGTCTGGGGTAAAGTTAGCAAAATACACGCAAAAATTGTGTTAGTTGCGA  
 CTTGCAAGGCAGGGACTTAAACAAGTGCTAAAATTCTAATTTTCGATTGTGAAATGTTATAGCAG  
 AACAAAAGAAGTCATATTGCTGTAAAACAAATGTTTTAGTAAATGTATAAATAATTTTAGATACTTC  
 TAACCGTTTTGCTGGTTATATTTTGTGTGTAAAATTGGAGACCGTAATGGTTACTTGTTAAACATT  
 GTAACATGTCAATGAAAATGTTTTTGTCTTTTGTAAAAAGGCGGGAGGATATTTGAAATTAACCTA  
 TTATCGAATTAAACACGTCTATTTGCTTTTATACCAATTTTATGATATTGGTTGATTCACAGTAATTT  
 CAAGTACATGTATTTGCTTGATTCAATTCAATACTTCAAGTTGTTTTAAATTAGCGAACAGTGCA  
 TTATTTTAAAATTTGTTCTAAAGTTTTTTTTTTTTTACTTGCTGCATTTTCTAAATCAAACGAATATT  
 CAACTTACATTACAGTTACCAGAAACATCGCAAAATTGAACAAAAATGTGTAATAATTAAGCTGG  
 AACAAAATTCAGAACTCCTAACGAGGTACAAAATTAAATTTAAAGTTGTAACCTCCAGCAGAGTA  
 TGTGACAAAAATCAGGGATGAATATAATGGGGTGATGGGTGTAACCTGCAGACAGTGGGAAATAGT  
 TTTATCACGGGATTTGAAGCTTGAACCAAGGCACAGATATCAATATCAGCGTTAATGATTTATGG  
 AACAACTTAGACAGGGTTTAGACTTAAATGTCTTCTCAACATCCGACAATAGATTTATACAATC  
 TTAAAAAAGTTGTTTACAATGCTGTTCACTATTTATGTATGATATTTAACCCTAAATATGATTATG  
 CAAAGCGTGCAAACAGAACCTGCAAGATATAACACTCTTAAAATTGTGAGGACAACTTTTTTC  
 CTACCTTTCTGTGAGAGTGCACGGATTGAATTAACCCTAATTGTCTACTAATACCAAATTACATC  
 TCATGACATTATTGCTGTTTCTGGCCATATATAAAGATCTATAAAGATCTATTCCAATCCTAGGTAAA  
 TATTATTTTATTGTCACTGCAATATACTCGCTATTTTTGTTGGTAATTTACTGGTACTGTATATGTCTG  
 ATCTTATGACCTCCTTAGTTGTGGTAAAACCTGG

**>run**

GTGACGTGAGTCATCCTACAAAACAAATGCATGCATTGCTCTTTAGGATACGGCGTGATGCATG  
 TACGTCGCAATCGCGAGTCAGTCAGTCTGTTCTGTATTACTCGAGAAAAGCACACTGCCTTTTCAG  
 CATTCAATCCGACTGTTTCAGTTTCACATGTGATTTTGTCAATTGAAGGTCCTCTACTAATTTCTGTG  
 CTTTAAAAGCCAACGTCAATCGTTTGAAACATATCACTTGTGAGTTGATTTTAGAAAGCGCGTGA  
 ACTTACTAACCAGCAAATTCGACGCCTCATTCGCCACAAGTATACTGTGATTACACTGTTACATATC  
 TACGATAAACGTGATCTATAAAGCGCTGTAGTAGCGCCTGGCGGCCACCCTGTTGTAATGTGA  
 AGCCATTGGCCTACCATCACATAGTTTTCTTCGCCGTGGGCATTTAAAACCCCAACCAAGAACGA  
 CTGTCGAACATAGCCACCGATTTTTCGGTTTTGAGGTGTGGTTTGAATATCAATTCAGCATCGTC  
 TGGCCAGTCAGGGCTTCGCCAAGAAGTCGCTCCAAAATAATTTCCCGCCTTTTATCCCCTTTT  
 CACCGCTCGCGTGGTAGAAACCTCCGGCTCAATGCATATTACTGAAGTTGATCACCACCTCCTTT  
 CATCGGGCTCTCCCCTGGCTAACCCGCTGTCCAAGGACCTCGTACGGAGAAACAACATTCACAA

CCACCATCACAAGATGGCCGAAGGGGGCCAGAGAAATAAGTCCATATTCAAAGGGGGGAGAAC  
 GATCGCTTGTGGACGCTTTATCGGAGTATCCAGGAGAGTTAGTGAAAACGGAGAGTCCCAATTT  
 TGCCTGTTCTGTCTTGCCTTCACATTGGAGATGCAACAAAAGTTTACCAGTGGCTTTCAAAGTGG  
 TGTCTTTGGGCGAAACCAAAGACGGTACGCTAGTCACCATCGCAGCAGGTAATGATGAAAACCTA  
 CTGCGCCGAGCTCAAGAACAACACCGCGGTAATGAAGAATCAAGTTGCCCCGCTTTAATGATCTG  
 CGTTTTGTGCGACGATCGGGTCGAGGCAAAAGTTTTACGTTATCCATCGTTATCTACACCAATCC  
 CCCACAAATCGCTACCTACAACCGTGCAATAAAAGTGACCGTCGACGGCCCTCGTGAACCGAGA  
 AGGCCCAAGGCTAAGCTCGAGGACCACTCCCGGCTCATTCTCCCCCATTCGAATCCTCCCT  
 TCCCTTACCGATCGGCTGGCCGAGTTCCATGGCTTTACCACCAAACGTGCGGGTCGCAGTCG  
 TCGTGCGCCGTCCGGGGAGGCATGCGACCAATCCCCTGAACACGACCAACACGTACTTACAAC  
 AAGATAACATTACCATGGACAGCATCAGCCTTCTCCTGCCAAATCGTGGCCCTACTACCAGTCC  
 AACAGCTTCTACCCCTCTCAGATGTGAGTAACACCATCACCACGACAACGGTACCCAGACCAC  
 GACGGACAACCTCATCATCACCTGTGGTCAAGATGGAGCCTGGCACGCAACTGACACCTCTT  
 GGACAACCCACGCAGAACAACACCCTCAACCAACCGTTTCGGAAGTTCCAATTCTCGCGCAAGC  
 GACGTGTCTGACCCACGTTTCGTGTATCCTGCGGTGACCAGTTCAATGTCTTTCCGTCAACGTC  
 GATGTCGGTTCTGTACCCGGGCATTGATACAAACCGTTACTTGCCCATGACGCCGAACCCCTTCC  
 CGCTGTGTCGCCCCGATCTGTTCTCGGCGACTCCCAGCACCCCGGTACCTTGACGTCCCCACCC  
 TACCTGCCAAACTCGCCTCCGTATCAGCTTTACCCGCATCTCTACATGACCTCACCGACCTCGCAG  
 ACGTACTACGACGGAACGCACCTCCCGATGCTCCCCAGGCCAGACCCGAGGACAAGCAGGAG  
 CTGAAACCCGACAGCAGGCCCCGCGAGGCCCCAACGGAAACCATTACCCACCACCCGCAACCG  
 ACGACGGACCTCTCCGTTACGGTGGCGTTGAACTATGGTAGCCAGCCTCAGGGTAACGTTGACC  
 AAATACCTCCCCGCACCATGGGGCCGTCCATGTCCATGTCCACAGGGTTGCTGCAACATCGCAAC  
 AACAGTCCCGCCAACAGCCTTTCACCGATGCAGCAGAGTATTGGACAGATGACCATCAACACGA  
 CGGTGCGTCACTTACCGGCGGTGACGACACGAGGAAAGAAGACGTGTGGCGGCCGTACTGA  
 ACAAATGAACGGTCTATTGTTTTACGGACTTAACGGCCATGTTTAAAAGTATCCCTACACTAAAA  
 TGGCTGCCTGGAATTTTTCTTTTTACAATTCTTCATATTATGAGGTTCTGTGAAGCTCCTAGAGA  
 CGATTTAATCACCAAGTATACACAGACAATCTACAAAACCTAGAATGCACCACGCATCTCAATTCAT  
 CACTTGTGTTTTATTCCATGTCATCCAGAATAGTCTCATTCAAATGATCAAGACAGCTGTACGATA  
 CGCGCATCACATTTTTAAAATCTCAGTGTTTCGGTACGAACAACGGATTCAATTGTGTACATACTTCT  
 TTAACGTACATCACTGTGTTTCGGTGTTCACACCTTGCATCTACGACATATTTGCAGATTCATTAATG  
 TCGCTGTAAATAACCATTCACCACAGCCGGGGGTACGGGACCTTGCGTTTGATCGTCAAACAT  
 TTCATAGTCAGACTGAGAGGAAATAGTGCATTCTGGTTTCTATGGACTTGCGTAAACCTCCAAT  
 CATGCATGAATAGATTTTTTCGGTGGATTGGACAATGTAAATCTAGATTTGAATGACTGCTTTATAA  
 TCAGCGTTTTCTTCATTGGGCATTAGTATTCTGGGAAATCATGGATCGTTTATTTTTGTACGT  
 GAATGATCCTCAAAGATCAACAGTCGTGGGAGAATGAAACAGTGAGCCCTCCTTTTACTCGATT  
 AAAAAAGGGACACAACATTTTACACAATTTACATTGACAACCTGTCATCGTGTTTGGAATAAT

GCAATCTTTGCAGCTCATACCCACACAATGTCAGTGCATTATCAATGCATGATTCATGAGTGTTTG  
 TCAGTGTTTTGGGGACTAGTTTTGGTGGATTATGTGACAAAAAGTGACAATTTTGAATGAAATGT  
 ACCACGAAAGTAAAGGGAGAAGTTAGGCAGCTGTTGTCATGACAACGTCTGTGCTGAATAGTG  
 CTGTAACAGGACCCAGACTCGGACCCGGACTTGGACAGGATTTTGATGACTTTTGTGTTCACCT  
 CCTAGACTGGCTGGACGTGGACTTATACCTTTAGGTCCAGACATATTTTCTGTATTTTTGTACA  
 CTGCTCAGAGTCTAAGAATTTTGCACATCTTGTCTTATCTACACTGACCAAGAAGTCATAACTGTT  
 TTCGCAAAATAAAATGAAAATTAACTTTTCAGTCTAACGTACATGTAGATTCTGGTCATGTTGTTT  
 TCTGTCAAATAGAAAAAACAAGTCGCTACTGACTGATCTGACATTTTGCCTAGATCGGACCC  
 AATCGGACCCGAACCTTTATTTTGTCTGGTAAACACCAGACTCTAGTCTATTCTGAACCGAATTTTG  
 GGCCAACTCGTTACAGCACTGATTGACACAGATAGTCTTACTGTTGCAGCTGGCCTGTTCAATGA  
 AAGATAATCTCATGTGAAAATGAAGGTTTAGAGGCTTGAAAATTCACACATGAACCTAAACATA  
 CCATTAATGTGAAATGCAATCTAGTGCATCATACCATTAGTACAAGTATCGCATCAATTTGAAGTA  
 CCGTGAAGCAGAGAAAGGATTTACATATCGTAATTCATAAATCGGTTTCATATTTTCATGTCTGA  
 CATGTGCTGAACCTTTTGTATATAAAATTCATACGTATTTTGTGTATGAAGATGATTCATCTTAAG  
 AGTTGAATTTTAAATTGTTTTTTTAAACCATGGAAAAAAGCAATGTATTAAACCTGTGTGCAATG  
 AGTAGTGCAGATGTGTACGTTGTTATGCAGTCAGCGTTGTACATGTAGGTATTTTTTTATCATTTTT  
 TTTTTTACAGAAAAACAAGTATAATCTGATTATATTCATTATTCATGACAAAGTGACAATTATCACCA  
 CTGGCGTGATTGCTAAAATCCAGAAAATTAATGTTCTCCCGTAAAAAGATACATGTGTATGTAAAT  
 AATGGCCGTTCAATGAAAAAATTCAATTTAACGACGCCATTACATCAACCCGAATTGAGTTTTGC  
 CCTGTTTTATTATTTTGTATAGTTGTCAAAGACAGTCAAAGTGTGCAAAAATATGCCAGATTT  
 GAATTTAAATGAAATTGTGCATTTTTTAAAAAGGTCAAAGTCAATTCTATGTAGAATGTCTTTTTAA  
 TGTAATTTACAAAAAAACAGTGTTTCATTGTTATTTTTATAACAAGCGCGACATCTAAATCTATGT  
 ATATCTCACAATTTATTTTAAATGTATTGACAAGAGTATGGAACCTTGAAATTGTTTTATAAAGAC  
 AGACTTCCTGGTATAAGATAAAAAAATATGTGACATATTTTGGCCAGGGGATTCGTATATTTCTTA  
 AAATTTGTGACATACGATGTACAATTTGGCAGTTTGACGGTCCCATGAAAGTGGGTATGAATG  
 ATGTTTACCCCCAAAAGTGGATATGAATGTAAGTGTGTTTATAAGATTATTTTTTTTTCAGGGTCTTT  
 AATGTATGTTTACGATGTCTGTTATACCATTTTTTTGTACTTGAAATTTAATATTTATAGGCATTAAA  
 CTGAGAAGCTGAAAACGAGCAGTTACAACAAATGCAACATTTTATCATAATTTTACACAATTTAAA  
 GTTGTGTAATTATCAGCAATTGGTAGTTGCGATTAAAACAAAGAAATTGTATGGTATGTACAATTT  
 GTTAAACAACTCTTCGTGAAAAGATTATTTCTTAAAGTATGGTGAAGCAATCTGAAGATCCGTTA  
 TATATATTGTATCCCATTTCCCGAATAAAACATTCCATTTAATAATGTATACAACATCACTTGTGCCA  
 TGTTGTTATACAAGTCCCTTCCTGCAATAAGGCCACTAATGCCAGTATTTGCCATGGGTATAGCG  
 GCTTTGTTGCTGAAGGTGGACAAATATTTGATTTCATATTTGTGTCCAACTCCCAATTTTTCTGT  
 TTGAATTCTCTTACTCAAATGTGTAGCCACCTTAATATGTTCTTTATCTTCTTTGGCACAACATATCT  
 TTCATTTGTGTGCAGTTTATATTTATTAAGTGTGTGCAAAATTTATTCAATAAAATCTCGTTTGAATT  
 GTATTCTGTCTACAAAGCTTCTCTGTAGAAAAATGTGTGTGTGTTTAAATAAGTTGGTTAATATA

TTAAATATTTATTACATGCATATTTTCAGTCACAGAGTCGGTGATAAATCAGTGTGTTCTTGGGGG  
 AGGGGTGCAGCGGGTGAATAGATGGACCAACAGTAAATTAACACAGCTATGAAAATGATGATGT  
 CATACTCCCTATTTCTGAAGACAACATTTCAATTTGTGTGTGGGGCTGGGTGCCATCAAACATC  
 ATTGATTTGAAATAGAAGTATGTAGAGATGAGAAAATTCATGCAATAACTATTACAGGGAAATAC  
 AGTTTCATACGGAGTATGAATTTCTGTATTACCTGTAGTTTTGTTGGGCAGAATTAGATTTGTAGT  
 TCTTATCTAAAAGACAAATATGCCCCCTCTGGAAATAATGTATCTTGTGGTGTGATCAGTTGATTTT  
 GTTTAGGTTTGGGGGGGAGGGTGTACATGTACTGTATCTTTCAATGAGTACACAATAATATTACC  
 CTGCCCATTAATAATCAAAGGGCGCTATCACTGTACAAAATCAATACAGTTAACACCCTTCTGGC  
 TGCAACCAATGATATCAAATCTTACGTGATCA

**>crebzf**

ATTACACGTCGTAATCAAACATCAGAGGTGGATGGGCGTTTTGGTTTTGTGGTCTGTGTTATTGT  
 GGAGAAAACGCGATTTACAGGTTGAAATCGGTAAGAATTTTCGGGATTTACAAAGTAAATGAAT  
 TTGGGTTATTAATCTTCCTTTTCTACGAAGTCTAGTATTCAGCTTGGCAATTTTACCGGAGTCTTG  
 ACTTAGGCCGAACAAGTTGGGATTAAGTGTGTCATGGATAACGTTAGAATCTAACTTAGCGAGTGC  
 ACTTTCACATTCGCAACTTTCAACTGTCGCCATTTCTTTCAGTCATACTACCAGTACCAGTACCA  
 GTGCAAGTTACAAGTTAACGAATATTTTTCGTCAGGACTTGTGGACCCCGGAATTCATACGTAA  
 GGGTAACTTAGCTGTTCTAACCAGTCACTCACAATATCAAGTCACAAAAAACGTTTCCAATGAT  
 TTTTTTTTTCTTTGGATTATTTTCGTTTTACGAAAATTACGGTGCAGTGTCAATTTCAAAACTTCA  
 TTAAAAATGCAACAAAAGTCTTTTTTTTAAAAGTTCATAAATTAGTCTATAGATAACTAGATTTGAT  
 ATTTTGATCAAATTTATTGTACGGTTCGTGTTGTGGAAATTAAGGCAGGCTGTGAGCCGAGGTAA  
 AATTAATTGGAGCAGCTAAAATTGCCATTAATACTTCATCCCGACCCGATTCAGCCAGGATATC  
 TCGTATTGAATACCGTTACAAGTTAACTTGTGAACCTTTTCATCACTTTGAATGTGCTTGGACATTT  
 ACAAACACTACAGATCTGCACGTGAATTTGTTCAACGACATGGAATCGTTCCAGCGTGACTTCCCA  
 GATCTCTTTGATGAGACCGATCAGTTCATGTTGAGTTCTCCATATTGTGAACCACTGAACGATTG  
 GGAGTACCAACCAGATGATCGCACATCTCCTGCGACAGTGACCAGTGCTTCAAGTCCTGAAAGT  
 ATGTCGCGTGAAGAGAGTCTGTTCTTGATGATACAGATCCCAAACGTGGCATCTGCAACAGCT  
 ACAGGGCAGCCCATGCTCTGATGTGTCTGTACAATCTCCTACTACGCCACTGCCAGACGAACTAG  
 AATGTCAAGACTTGTGTCAGTATTCAATGAAAGTTAGCAATCTGGATGAGCCAGTACTGCAAAAT  
 GGCTCTCTGGGTGCGATATCATCGGACTCGGAGTCAGAAACGAGTCATCTGACTCCAACCTGCAA  
 CTTCAATGAACAACAGTGCATTCATGGACTTACATCTGATGTGGCCACATCCAACCTGCGAGACC  
 CAAAAGAATTCTGGGTCTTTGACAGCAAGCAGCAAGACCAACATAGAGCCAGCCGCCCATGT  
 AATACCACCAACTCTACGAGTACGAGGGGTAGGAAACGCAAATCAGCGCCAGACACAGCAGAG  
 GAGGAGATCACCGATCCCGTTGTTGCCAGAAATGCGAAGAATGCCATCGCAGCTAGAGAGAAC  
 CGACTGAAGAAGAAGAAATATGTTGAAGGACTAGAAAGTGAAGTTTCATCACTGAAAGCTGAA  
 AATGAAACACTTTTGAAGAGAATGATGAACATAAGCAGTTAATTAAGGACTTGACAGCGCAGC  
 TTGAGTATCACAAAAGTGTATTGTATAATCAAAGCTCTTTGTCACAGTTGCTGAAAAGCATGAATC

CTGAGCCAAAATTACGACTGGGGTCTTCAGTGGGTGGAGCATCAAGCTGTGTTGTAAAGGAGG  
GACAGAAGGGTGCAAATTTACACAAATGAGTGGCGGTGTTTGCCTACATGTTAATGGGCCAAA  
TGCCTCCCTCGAATTTTGTGCTAAATGCTCTGTCATGTCCCAAGCTACATTCAACTCGTGACTIONA  
TTGTGACACTGCAGTGCATGCAGAACTTTCAAACAAATATGTATAAATGTACATAGTCTGAAA  
CGTTGTGTACATTATTGTCTAGCAGAAGACTAAAACATGTCATGTACAGTTCCAGAGAAGGCAGA  
TTTCAAAGGCGTTGATGTATACTCAATGATATGTGGCTGTGGAGTGTACAAGCAGTTCCTGTTC  
ATCTTTTAAATTAATGATTACAAACATAGAACTGTTGGTTCGAGAACCCAGTGTCTTCAAATATTT  
GGTTATCGAGGGGATGTCATTGAGCAACTAGTCTCTGCTCGTCATATGGAAATGAAAGTAGGTAT  
CTGCTGTCAACATGGATCTGCTACAATGGTTAACAAGATAATTGACAACTTCTATCACATTTGCA  
GTAGAGGACAGTTTGGGGGGATTCTGCCCAACGAATCTTTGAAAATGTAGCTGAATAGGTGA  
AGTTGCCAGAGACTGGATTCTTTGCGAACCAGTATACGGGGAAATCTGAAGTCTGATGCATTCT  
GTAAATCTATATTTGGCAAAGGAGCAAGTGTGATTCTGAAAATCGTAAATAAGTAATATGCGTA  
TGTTTACGATGTTGAGGTATTTTGACAAAATATCTTTCATTAGAATGATTTCTTTTCAAATTTTGC  
ATGAAGGTAGAGCATGCTTGTGCTGTTTAAAAAACACTCAGAACGTAAATTTGAATGATTTGTTA  
CTTGCTCCCCTTGCCAAAGTAGGTTGTATCACAGTGAGGCAAGATCAAGAATGAGGAAAGGCT  
GTCGTGCCAAATTCCTGTAATTAACCTAGAACACCACCATTTTGAGCTTTTCTGCAGAAAACCTGG  
AAATCAATTCTAAAGAGACAGACTTGTATAGCACATCCAAAGTTGAAAGCAGATACCTACATACT  
AAGTGTGCATGTAATAGTGTCTAGCATCAAACTGGAAAATGGGTTGGTGTATGAAGATTTTCTTC  
AAAGTCAAATGTTAATTATAGCGCTTTACATCAATTAAATCAACTTGATTTCTGATTATGTAATTCTA  
ATCAACTCGCTGAAAAATGGAAAATTGACACCTTTTAAATCTTCATAAAATTTTAAATTTGGCA  
TGTGTGGGAACCTTGAGAGCCCTGGGTAGAATCAGTGTTTCATCAAATTTTGTGTTAGTAAATAAA  
GCCGGTGAAAGCAAACCTTAAACAGAAATTCCCATTTCCAGTTTTCGTACTAGGCACCATCTTCA  
AAAGAACTCAACTGTTACATGGTGGCAAGATGTTCTGTTCTTTGTACAAGTATGTGCTAAAGAGA  
TTTCAGAGAATTATTTAACTTTTAAATGTAAATTTGAGAAACATACAAGATGGCGACCATGTGCA  
AGCCAGTCGGTGAGATGCAACTGCAGGCAGTTCACTCACTTCATATAAAATTTGTAAATGTTTTTC  
TGTTGAATAGAAAAGTATTCATTGTACTTTAAAAAAATCATGGAAGAGGATAAAGAATCGAAGCA  
GTTACACCTTTGTACAGATATTTATAGTGAGAACCGTATTGATGCATTTTGGCCTCTGTTTTAA  
TTGCATGGCAAACCTGTATTGATGTGTTGAACATCAACATAGTGTTAATCGCCACCATGTGACTGT  
TGTAACAAAAACAAAAAAACCAGATTGTAACACTGTCAAACACTACTGTTCCAAAAAA  
CAAATCATATCACTAAATTTCTTTGAAGCATAACCTCATTATTCCACAGTCATTTATGTTGCGGGT  
TATGTTTCCTAATTGTACAGTACTGCTATGTTTATATATTTAAAAAAACAAGTATAAAACAGTATT  
GTTTGACAGTGAGAATTGACAACTAATGTTTCATGTGCCTTCCCTTCCAGTGTTAAAAAAGAAAG  
AAAAAGTGGAAGAATTTGTTCAAAGTGTGTTGATACAGAAAAAAACTTATAAGATTTCATA  
CCAGAAA

>elfA

AGTATTTGCGCCGCGATATTTGCGATCGATTGCATGCAGATTCGTCTGCGAGTCGTTTACGTTTG  
TACAGTGTGAATTTACCTGTTTGCAAACAGAATACATGAAAATGTCGTCGGATGTGAGAAAAAAT  
CTGGATTTACTGCTCGAAGCAGCTAATGCCTGTGACAGTAAATCAGACGATGCAGTTCCAACGA  
GTAAACCACAAGAACTATCCTGGCTGCCAAGGCATTGTTAGACATATCGCCCACAACCAATGGT  
GACGAGAAACAGTTTCCTTCGGTCGATGCCCTCTCAAGAGTGTGCTGCCTCCAAGCCCGGCTG  
AGGGCGGTACAATATCGGTCGATGATGAGGATGATGACTTGATGAAGCCCCAGGTATCACATATC  
AAAGTTGACGAAGCAACGATACAAGAATTAATGCAGAGGGGAATTTCCCCACATTCGGCTGAA  
ACGTAAACACACTGATGCAAGCAACGCTTAGGAATTCTGAATCAAATGAAATCAATAGTATTCC  
ATCTCAGTTCGTCTTTGAAACACCAGAGGTCTTCTCGACGTTGGTCAAAATATTTCCCTTGTATC  
CGATCACGACGCAAAAGAGCAGAGGAGGCATCAAAAAAGTCCAAAAAGAGTCGTAAACCAA  
AAGTCAAATCAGAGTCACCGTTACAGCTTTCAAACAGCGGCATTAAGAAGAAGCCAAAAGATTC  
ACACACAACATATCTATGGGAATTCTTGCTAGAACTGCTGCAGAACACGGAAACGTGCCACGG  
TTCATCAAGTGGACGAGTCGGGAACAGGGGATCTTCAAACGCTGACTCGAAGGCCGTCTCA  
AAATTATGGGGTCAACACAAAAACAAGCCCGACATGAACTACGAGACAATGGGTAGAGCACTC  
AGGTACTATTACCAGAGGGGGATCCTTGCCAAAGTGGACGGACAAAGACTGGTGTATAAATTCT  
GTGAAATTCCCAAGAACATTCGCGAAATTGACTGCAGTTGAGGATTGCTTTTGGCTTTCTGCAC  
AATCTTTATGACAATGACAGACTATAAGCGATAGTGTATTTAAAAAATTGATTTTTTTTGTCTT  
TCTTTCTGTTGCAAATCATATGTAAATTTTGTAGCGTTCTCACAAGATGTTTATAGAAGAGATATTTT  
ATGGAAATCTGTAAAGAAATGGACTTTTTCAGCTTGGAGTGGAGTTTGGAAATGCGACGCAAGTTC  
AGGGGTGTGTGTTTCAGCGACTGAAATCGACATGGATGGGACATTTACAAGGAAATCTTGGTA  
AATATGTAGCACTTGGTGAAATCATACTCACCCTGTGCATGTTTTTGTGTTGTCTAAATTGTATTAA  
GAGAAATACAATGTAATATGCAACTGTGTCTTGTGTATGAAGTAATTAGTGAAGACAGTAGTAAT  
GATGATAGCAAGGATGATAATTTGGTGATTTTTT

### >I3mbt

GTCTCCTTAATTTTAAATGTCTCAACTCTCTCCGAGTTTTTCAGTATCAATATTGCGTTGTAGATT  
TTCAGTGCAGGTCCGAGCTTGATGCTCATGATTTTACAATGTCATTCTGAGTAAGTAGGAGAAA  
CGCTTCGCCGTCAATTTGCTCTTCTGAGAACTTTGACGCATGTTCTGGCATCCCGGCAACTTGC  
CCACAAAGTTGGCCACCTCGTCCATCTGCAACGGTGCTGGGAGACAGCCCGGCCA  
CGCTGGTAACAGCTTGGAAATGCTGCTCCAGCAAAGGGGCAAGTCCTTGGCAGGGTGGGGC  
GACATGGCAGACATGAAGACAGACTGGTGGAGCTGGGTTTGCAGATTGTTCTGTGCGTCGGAA  
GCATGTTTCAGGCTTTTTCTTCCGACCAGGGTCCATCATTGGTTTTAGTTTCTTCTTGGCCCTCCCC  
ATCCCCATTCCTTTTGCAGCGAGTGGAGGGCGCCCCCTATGGTGATGTTTAATCATTCTGCCGA  
GACCTTGTCTGTTGCACCTTATTCTGGTTCTTTTTCAGCCAGCGGACAGCCCGACAGTTTGTGAT  
GCGCCGTGTACTTCCAGTCACGTGACCAGAGCCGTCGAGCCAGGAGTCGGGCACTTGAATT  
CTGATGTAGGTGGTGAAATGGATATCTTCTGTCCCTCTGCCGCTGACCCCTAGTTGGACCCAGT  
CTGTCATGGAGTGCCGTCTCTTTGGTCATGTTTCAATTTGGGAGTAGGGACAGCCGAAAGCACTGT

GATGTCCTGTGTA CTTAGCACCCCTTGATGTGGCCTATACCACTGCAGCCCAGGGTGGGACAGCCT  
 GATTGACCAGCCATGTTGCTGGTGAGGTCTTTTGTGTTGATGGGAGGGATGAGGGGGTGACCC  
 GTCTTGGTACACCAGCCGACGGGATGAACATCAGGACAGTCATCATCTACCCAGTAGTCGTACA  
 CACTATCCCATCCATCAAAGTGAATCAGTATTCTGAAGTCTTCCACAGCCGCTATCGTGGCAACAC  
 GAATGAG

**>emx**

GAAATTTGTCCAATTGTGTTCTGTTGGGCTGAATCTCTCATTCTCGGATTTTTACCATTTGCTGAGC  
 CCTGTAATGATGAGCATTGATACATGGCCATGATATCTTTACTGAGAGCATTTAATGGCCCTTGA  
 AGAACACATTACATTCGGGAGATCTACCAGTCTAATTAAGTCGAACCCGCTATCCTTTGCCTAGCC  
 GGGATTCAATTATAAACTGCTTCGTGAATAGCCCTCATGACTTCAGGAATACGCATCCAATCATT  
 GCGCTTTTACAGAGTTACACGCCACGCCTACTCCATTCCATGTACTAAACGTTTTTTGCTGGTGC  
 GGTGTCCTCTTTTTTTCAGTGCGTACAGTTAAGATGACTCAGTGCCCATGATAATATCGTGATAA  
 CCAGCGAAAACCAAGCGTCCATCCCCGTGTCGACAGTTGCGGTATTTGGCGTGTAGTCGGAATA  
 TTCATCAATATTGTAGCGGTGCGATAAAGTAGTAGTTCGAGCAAGAGTTTAGCCGATTCTTCAAT  
 GATGACGTCACGACAAATGACAACCCTCAACTGCCAATCAAAATTGACATGAGATGCAATGGCG  
 ATCAGAGAGGGTTTTGATTAGCCTCTGTAGTCTGTCTCACCAGCTAATTGGACCCTTCTAACGAC  
 TATGCAAATGGACCGATTAGCAGATTTAGAGAGAATTTATTCTCAAGACCGTGTAGCGGGTGCCT  
 ATGACCGGTCTCTTGATTGACTGTTTCATATGAGGGGGTAGAGATATACAAAACGTGGTTCGAAA  
 GAGGAAACTTTACGCAATTTACTTCATGTTTTGGACTTGTCGTGATAGCGCGGGAAAACAGGGA  
 GGTCTCATCAGGACTTACGCATACCCGACAAACCCGAGCTACCACTACCGTACACGACTTGAT  
 TAACTTTAAGTCTGCGATTTAACATCCCCGAGTTTCTGAACTTAATATACACCGGCATTACTACTCA  
 ATGAGTTTCATCATAATATCGGATCTTATTCCAGAGTGACAGCTCGACGTAGAAACTCGTGTGTTG  
 GGGTAGTTTTCACGCTCCGTAGCCTCTCAAAAGAACTGGAAACTCTCCTTTCTACATGCGCATGGA  
 CAGAGGAGTGTGGGGGCATTATCAAACTCGCCACAAACGAAACACGCAGGCCGTGTTTTTTGT  
 CACATGTGATTCCACACAAGAACTGTCTAAACTTCAACTTTCGGACAAATTTACTTTTTGTAGCCA  
 CCGATCTTTGGACACTGGACGGTGACAGTTTCAAGAAGGACATAATCAATTTAGCTATCTGAA  
 AGTACTTGGAGTGCGAAAACATTATTTAATCAAGGAAAACATTTTTTCAGTTAAATAAAAAACGA  
 TGTCGGCTGTGGACTTATTTTCGGCCGCCTGTGTGCGGGATTCTACAACAACAAATAGTACCCCG  
 ACAAATCGAGCTGTTTCACAATCGAATCCTTAGTTTCTAAAGATGATCATCGACATCGGTCTTCG  
 TCGACGCCACCGAAATCGCCCACTCTCGCGGCGACAGCATCGACGGTCGACTCGAACTCACTAG  
 CATCGTACCCCTGACGCCGCCTGCGGCTAGCCGGGGCGGTATCATCAAACCCATGCCACAGA  
 AGCCTCGTTCTTTACCTCCTTGGGCAGCATGAAGGGACTGTATCACCCCGAACCCGTATACCACT  
 CGTCCACGGGACCCCCGTCCACATCGGTACATTCCCCAACAACTCGGACTAGCAGCGCATCA  
 CCATCACAACTGGCCGCCGAGCCGAGCGGCGAGCCGCGTCGCACAGCCACCCGGCGTTGGC  
 CGGTGTGTTTCGGGCCGCCGGGATGGCGGGGCCGAGGCGAGACGGCTTCGGACTTTATCCGT  
 GGTATTGGCGAGGAATCGGTTTCTAGCCGCCGCCACAGACCATTTCAGGTGCAGAGCTTCC

AAACGGTGGTTTCTTTCTTCAACACCCGTTCCGAAAACCAAGAGAATCAGGACGGCCTTTTCA  
 CCTTCACAGCTACTTCGGCTCGAGCAAGCATTTGAAAAGAATCACTACGTGGTAGGAGCAGAAA  
 GAAAACAGCTGGCAGCAAGTCTAAACCTAACAGAAACACAGGTTAAAGTTTGGTTCCAGAACC  
 GAAGGACGAAATACAAGCGAATCAAGGCGGAGGAGGAGGGCGAGCAGGAGCCCAAGAAGA  
 AGGGATCGCATCACGTGAATCGATGGAGGATGGAGACACAGCAAGGAGAAAATGATTGAAAGT  
 AAACATACAATCAGACAGTGAATTTCTGTCATTTTTAATCCAAGACTCTTGTTAGAACCTTCGTCT  
 TACGTGTTGCATTAATGATGGACAATCAAGAACAGCGCGGTGTCAACTCAGTGCGATATTGTGA  
 GAATTCGCCTCCATTCAATTTGTTGCGAAAACGTGTGACAGGAGTTTTTCGCGGGAAACTGGAAC  
 TTTTTTGTAAATTATCATCGGGTAACGTCTGTGAAGAGTAAAAGTCGATTTGGTGAATGACAAA  
 ATCTTCGGCAGCAAAATGTCCGCACGGATCGATTACTGAAGTGGCAACACAAACATTATTCGATT  
 ACGAAGGAAGCGCATAACTTACGAGCAGCGATACGTGACTGTATCCACGGAGCTTTGTTGCGCA  
 CGTAACAGTTTCGAGCCGACGTTGCCCGCAAACGTCCGGGAAGGTTCCCGGAGGCATTCACGTC  
 GACTTTCTGATGAGTACTCCGGGTTCAAACCTCAGTACTGATTGTTCTGTTTTAGTTTTACGCAC  
 AAAACATATGATTTGGAGCAGCACTGACCACTGGTAAACTAAAAAATAAAGCTGGAACATAATC  
 GAAAACCATAATTTTGCATAGATATGACCAAAATATGTCACTTTTTTCAACCCGTGTACATTTTCAT  
 TATGAGTAACACTACGCATTTTCGATTTTTGCGATTAAAAGCACATTAATGTTTATAATTTGATAAT  
 TACTTTAAAATTGCACTGGTCTTCTCTGCAACCGATAGTCATAAATTAAGATATATAGATACATG  
 GAAAATATACGATGTATTATATACAGACTTTTATATCATATCTATCTTGACTTTCATTATCATTGACAC  
 ACCTACGCGTTGTCAATTTACTGAAATCTGTAAGGTATATAGTGAATACTATTACTTTCAGTAATCA  
 CTTGGAAATGTGACAAATATTTTGATCTGTTTCAAAAAAAGATACAGAAGTAAATACATTCAATAT  
 CATAAGTGCGAAGGGAATATAATCGTATAATATAGAAAGAACTGAGCACAATGGAATAATAAAC  
 AATAACGGAATCAAACCTTGATATCCGTGGATCATGAAGATTATGTAATAACCCATTTTATTACT  
 GGAAGTTTGTGTTTGTAAATCACTAGACAATCATCATAATCCATATAATACAGTATATCCTTGATAT  
 TCATAATGATTTGAATGGTATAACTGATTTTGAGTAAACTGGACACATTTCAATTGCTAAAAGGT  
 AAAGACGGTCACATCCTTTTACAGAGTACCATTTTCATGCATTTATTTGAATGTTTATTTCTCAGA  
 AATGCTTGTAAGCTGTATTGTTGGGAAAGGGGGAATACACGCTCAGTTGCAAACGCATCTTAAAG  
 AAATCCACGATACTTTGTCGCCATTTATCCATGGAAGAGAGAACAGAAAAGAGGAAACATTTGA  
 AATTAATATAACCTATAAACAGTGAGGGGTTCTGCATTTACGCGGCAACAGTGTGTTTGTCTTT  
 CAGAGGCCCTGACATGTTTTATTATTATCATTATGCGTTGTATAGGTTGACGCGGAAGAGGCAA  
 GCTCCTAACGGTGCGAATTTGCGATGGTAAAAAAGAGCGGGAAGTCTTTTCGTTGTATTTGAA  
 TGCAGCAGACGGCAAAATCAATTCTGTGTAAACATTGTATAAACAGAGAGGTTGGCCTATTTTC  
 TCTAAGTGCCCGGTTCTTAAATGTTGTTACATCCAATATCAAACCGAAATTGATTATTATGATGAC  
 GATTTTACGGTAATTTTGAATTAGTGTGTAATCTTAAATAAATTACCTTGATTTTCCAATGCTAATTT  
 CACAAATTTACCTTCTTCGTACGGGGCATTAGCTACAGATGTTTTTACTTCGCATGAAAAATCGA  
 TCTTGCTTTGCACAAAGTGAGACGAGTTCCCAACAGGTATGTTTCATCCCAATGCTTAGAATTTG  
 ATATTCACACATCAGGTAGCCATTTTTTTGTGTACGGTTATCAGGTATATATTGTCATCATAAGGTG

AGTAGAAACAGAGCACAAGCTTTCATTTATTGCATGAAAATGATGACTTAGATGAATTCAACAAC  
 CCATCCCATTGTATGAAAATATAATTTAGATGAAATTATTGATACATCCAGGAAACCGGAAATTGA  
 ACTATTCTAGTAATCAACGTCATTTAATTTTCAACTACGAAAGTGTTTAAAAATACCGGTATACATG  
 TGATCCCATAATGACCTTATGAGTGTGTAATGTTCTTCTCAATTCAAGCAATAAAATCCCTTAGAAA  
 GAATTTATAAATTTATTTGTGTAATCTAACCAGATTTCTTGTGACCAGAAATTTAAAGGGATTGT  
 GGGCTTTTCAGTTACAAAGCCAAAACGTGTAATTCTCAGTAACAATGAAAGAAATGAGAGCCTC  
 GTTAATCCAGTTTGAATGTTTTCGATTCTTTCTGTATTTACCAAGGGGGCCAGCTGTGGTGAATG  
 GTCCGTAGAAATGCAATACATGAGTATAAGGTAGTCTCCTGAAATATTGTGGTAGATCGTTTTACC  
 ACGTTGGTGGGTTACGTTTATCATTACATAGATTTTTAAATTGTGTTTGTGTATAAATTTAATTATGA  
 TATATAAGTATATTGAGATGAATATTTGGTGCTTGTAATTTATTGCCCCATAGGGGTTCTGGTAGC  
 CATAGTAATATAATTTCTTTTCTTTTTTTTAGATTTGCCAATTTGTACCCTTATTTTCTTTCTTACT  
 ATTTTGAGGTATATGTGACGATCATAGAATCCGATCTGACTTCAAATCTTCACCTATGATATAAAAA  
 ATGTAATTGCTTGAATGGTGAAATATTAAAAAAATATGATTTTCACGGACCAAAAAA

**>awh**

GGGTTGACGATTTTCTTAACTTCTCTTAAAAACGCCACTCCGGCCACTTAAATGACCATTGAGAC  
 AACAGCTCGAACGCCATTGGCTCGCCGGTAGTCGATGGGCATTAGACGGGCGGGCGAATCGCT  
 CGGTCATTTCTATCGCAGCGCGGCTCGGTCAAGTCAACGGATCGCACACGGGGTACGTCAAC  
 TCGATTGCTGGACATTTAGTTATATAATGAATATCGATAATTCTTACAAGTACAACACTCAAACG  
 TTGTAAATAGCTGGAAGTTGTTCCGGTACTTCGTTTAGTGCAATAAGAGGAGCTGTGTTATTTTT  
 CGCCATTTTTCTGGGCTACTTCAGTTGGTATTTTCTATGCCTACGTAAGTGTGGTACATCGGATA  
 AAAAAAATTGTTGTTATTGACGTTAATCTTCGCTGACTTTACTTTTGGAGAGAGGATTTTTTAAAT  
 ATAGCATTGCTGTTGATCAACATGTGAAGTTCGTAATTGCGTCCTGAGACGATAGTGAATTTT  
 TAATGAAATCGCCTCGTTGGAGAAAAAATAAAATAGGCCTACTGTTTCTTTAAGCGCACCTCGAC  
 GATGTATCAACTTGGATTGTGAGATCTGACTATTTTTGTGATGGTATTACTTCGTGAGAAAGCAAA  
 CATAAACGAAGCCGACAATCTTCACTCTTGAATCTGTAACCGAAAAAAAACGTGTGTCGAA  
 CGAACGCTCGGCTGTATGGGGCGGGAGACCGCCGGCGTGATGACGGCGGGCAGCTGTATAC  
 CACGATGAGCCAGGTCAAACCAGAGCCGCTGTCTGATAACACGCATGAAGGCGAGTATTGTGT  
 GGGATGCGGTAAGAGCATCGTCGATCGGTACCTTTTGGAGATTGGACGTGGTCAGAGCTGGCA  
 CGTGCGATGCCTGCGGTGTCTGGAATGCAAGGAGAGCCTCAGCTCTCATCAGAGCTGCTACTTC  
 AAAGATCAGAACATTTTCTGTGACGATGTTACTTAAGACAATTCGGGACAAAATGTGCCAGAT  
 GCTGCCGGAGCATCGACGCTAGCGACTGGGTGAGACGGGCCAAGCAGCACGTCTACCACCTG  
 GCCTGCTTCGCCTGCGATAACTGCAAGCGACAGCTTTTCGACCGGCGAGGAGTTCGCCCTAACG  
 GAGAACCGGGTGCTCTGCAATCACATTACCTGGAGATGATGGAGGCTTCTTGCCGAGGAAAC  
 GGCGATAGCAATGGGTCAGAATGCAGCCCCGACAGCAACGGCGGGGACCGCTCCCAACAGAA  
 GACGAAACGAATCCGTACCACGTTTACCGAAGAGCAGCTAGAAGTCCTACAGGCCAACTTCAAC  
 GTGGACAGCAACCCGACGGTCAGGACCTGGAACGGATCGCCAGATCACAGGACTAAGCAA

AAGGGTAACCCAAGTGTGGTTCCAAAACCTCGCGCGCCCGACAGAAGAAACACAGCACACCGTT  
 GGGCGAAATCGGGGGACCCGGCGGTGTTGGCGGCGGGGAAGACGGCTATACTCAGTCTG  
 CACTGTCCAGTCGCAAAATATCAGCAACAGTGGCGACACAAGCTCATAATAAATTTGCCAATATG  
 ATGGACTCCTGCATCAAGTGTGGAATGATCTACTGCCTCTGCGATAAAATGCCGGGCTGCCCCAC  
 AAAATCCTGACCTGAATCGTCCATCCTGTGCAGCAGTTTGAGCAAACGACCCTAATTCAGACCG  
 AAATATTTTTACAGACGGCTGGACAATGTCAGAAAAAACAACAATAATTTTCAGTGGAT  
 ATGTGCGTCGTAATTTTCAGCAACATGCATGGTGCATGACTTTGATATACGCAGGAGGCCATAGAC  
 TTATATCAAATTACTTGGAATGTGCAATAGTAGGCTTGAGAGTAAAGTAGTTCTTGTGACGTC  
 ATGGATGCCCGGATGAAGGTTCTAGTCCATATAGATGCTGGTATTAAATCGTTCTTGTCCAGATTC  
 AACGGCTGAATTTTAGCTCACGGTATCTGGAAATATATCTATCCGTTGCTTAAATGGGTAAAGCA  
 CTTTCTCATTGTGTATCTGTGAATCACGGAGTCGGTGGACACGAATTTGAATACTTAAATTGAG  
 ATGGAAATATTTGATTATCATGTAAGGACTTGAATCGATAATATTGTTATTAAGTATTTATTGTTAA  
 CGTACATCAGATATTGTGTTTATTTATGGTGATAGTGTAATTGTTTATATGTCATTGTCTTACATGT  
 TTCTTAATTGTAATTTTTAAATTTATTTAAAGTTGAAGCCAATCAATTTGTACATTATTCACA  
 AAGTGTTTTCTTTAAATCCCAGATATGGTATCGATAGTAAAGTTTCAAGTATGAAAGCAGTTTG  
 TCACAACATCATATTAACTTATATCCTGTAGTTTTCAAATCAATCCACAATTATTACAAAAACGCAT  
 TATGTTGATGATCGAACAAATACTCCATTTTATTCTATTTCACTTGAATTGGCTACAAATTAAACGG  
 GCTATTTAGTCATTTTAGCACAAAGATGCTTTCATACTTGCACGCAAGATTTAAAGTCCCCGTTA  
 AAGGCAAAGTTCACGCTGAAGTTAAGTTCATTTAATAGAAGCAGAAAAAGGAGAGAAACATA  
 TTAATAAAGGTTTGGTGAAAATCCATCAAAGAATTACAGAGTTATGACGTTTTAAAGGTTTCATT  
 TTC

# **>sp5**

TTTTTTTCGATATCATATTTCTGATAACTTTTTAATTCACCATATCAACTGATCTCTTATCACATATGA  
 TTATAATATACCAGTCATGAGTCAAACACATATAACTCTGTAAAAACATAACTTCAACTTTTAAAT  
 ACATGTAGTAAACATATAATAGGTACAACCTGGCACTTGTAACCTTTCCAAATATACAAAAATCATAA  
 CCAGTTTTAGTTACTTTGGCAATTTTAAAGTGAGTGTTAAACTAAACATACACGTACTCATTGCAC  
 CGCTGTATCTGCGTTTATAATCAGTGAAATGACATGAAATCGTCAAGAGATTTACATACGATTTTGG  
 CAAACATTAATTGAGCTGCGTCAACAAAACAGTTTGTAGAACAGTGAGTTCCAGATGTTATTATA  
 TGCTTCGCATTCAATGTCGAAACTGTAATTCCCGTAGGTTTACACAATATAAAATTGCAGTCAACA  
 GGATTGTTTTTTTTTTTTTATTAAACAGTACTGTTTAGTCACTTCACAACAAAAACAACAACCTGTAT  
 GTACTGTCATATTTAAATCCGCACAAGGTGTATGGGAGGTGTCATGATGAGTAAAGTGAAAAG  
 TTTGGCGCATCAATGGATTTCCACACGCACAGAGTTACAGAAAAATCATCACAGGTTGGCATGG  
 AAACACTGAACATCTGTCGCAATGTCACATAAACACGTAATAAGCCTATTCCGAAGTTACGTCAA  
 CGATTTTCGTCCTCACTGTCGCTGTCGGATTCAACGTCGTGTTCCGGGTTGGAGGGACTCTTTTCTG  
 GCCGCATGAGTCTTAGCGTGTGCTGAGATGATCGCTCCGCATAAACCGTTTGCCGCACTCCGG  
 ACAAACGAAGCGTTTCTCCCCGGTGTGAGTGCGGAGATGTCGCTGCAACTCGTCCGATCTGGTG

AATGATTTCCCGCAGAAAAGCCAGTTGCAGACGAATGGACGCTACCCCGTATGCCATCGAAGAT  
 GCGCCTTGAGATGGGACGTTTTGCCGTACACCTTCCCGCAACCCGGAATGTGGCAGATGTGTTG  
 ACGTTTTTTGGCGGGCTCGCCGGAATTCGTGCGGTTGAGACAGTTCGGGCAGCGACATCGTCG  
 GCATCGGCGAGCTGCGAGTTTCGTGATTGAACTCACGGGTGCGGTGTGCGAAATGGTGGTGGTA  
 GACGCCGAATGCTGGAGTGTGTCGAGAATGGACTGACAACGGGTTGTGGTACGCCTGCGTGG  
 GGGCCGGACGAGTAAGACTCCACCACTGCTGGTCATCGCCCGGTGGCGTGAGTCGAACAGGA  
 CTTGGTACGCTCAACCCCGGGCTCGGGATGTTGATGGTGGGTGGGGCGACGGGCGATAAACTA  
 ATATGTCCGTGGTGGTGGTGGTGGTGGAAACGGTGCAGCCACAGGTGGGCTGGGCGTGTGCA  
 GGGCGAGTAGTGATGGGGGATGGGGTATGGATACCTGGCGGGCACATGGGCTGACAAGCGT  
 GGTGATGGTATGATGATGATGACCTGGATGGAGAGCTTGGTGTCCAACGTGGGCCACCATCCC  
 CGGTGTGCACTCGGGGTCGTGCTGCAGCGGCCCAATGATGATGTAAGTATGATGCGATGGT  
 AGAACAGTCTGGTGCAGGAAGCACGTGTGCGCCGTTATTCGTGCGGAGACAATCGCACCGGTTTC  
 GGCAGCGCCGCTCTGCGGGAGGTGTGCGCGGCAATTCGTACCTCCGTGTCAGGTGAGATGAG  
 GGCAACACCGCGGCCATAGCTGTTGCAGGCGTCGGCGGTGTGATGGGTTTTACTTCGTGACGTA  
 TCGGCGCCTGCACACCTGAACGTTCCGCCGGGGCAACAGCAGTGCTTTGTCCCGGTGATCCCC  
 GATCTTTCGACACGTTGCCGCTAACATCGCAAGCGGGCTGGGTTTACCGAGTTCGCCAGGGTTA  
 CTTTCTGGAAGCTGTAAAAATTTGCTGGAGTTTGAAGCTGCGGCATGTTGAGATATTTCCGCTT  
 GAGCACAGATACAGTCAGGCGAGCAAAGATGATGGCATTCAACGTGGATGTACTAGGAGCAGC  
 TGAGAAGTTTATATTTCCGAAGTTTTTCGAGAAGGCAAGATGAGTTTTGACAGCATTGACTTCTC  
 CGTGGCATGAGTTGTCCGTGTGTGCGAGGTATGGTTACTGGACACCCAATGTTATTTGTACGCCG  
 TAGTGTGAATAGGCGGAACGATCTACCCGCATTACAGATAGCTTTTATGTCGCCGCCGCCCAAT  
 GATCGCCCCATCATAGTACTTTGAGTAAAGCCGCCACCAATCGCTGCACAGTGCGGTGGATTTG  
 AA

# **>nfat**

AATAAAAAAACCCCCCTTGTTCAATTTACCGGCACCGTTACCCCCACCCCCCCCCCAAAAAAA  
 ACACAATCCTTCTAAATTTCTTCTTTTCAGCACAAAAGGTGGTTACTTTACCCACCTCTCAAATGC  
 TATTGGGTGTAATTTAGTTATCCACATGTGGCAAGTGGGCAAGTTAAATAAAACAAAGTGTATG  
 AGTTGTCCAAGAAGGGTCACTACTATTCATGGCTCATCCGATATGGTGCTTTGAAGAAGTACTGA  
 TCTGAAAATACATGCAGCTGCATATTATGCAGCTTGTTTTAGAAAAGGTACCTTTCATATATGGTG  
 GTTTGTGCTTTTTTTCTATCTGAAATAATCTGCTGTAAACATAATTTGGTGAAAAATTTTGCTTGGC  
 AAATACACAAGTTTTTGATGTAGCAAAAATACATCTTAACACAAGAACACAAAAATTAGGGCTTT  
 CTTTCATCAGTGAATACATTTTGGCCCTTTTACTTTTCTCTATAAAATAAATATATGCAATGTACATGA  
 AAACAAAAATAATTATATACATTATGAACAAAGTAGAAAAAAGGTATATACAGGTAACCTATATTTA  
 TATTTTTTTTACATATATTTACAGAAATATGTACAAAATTTACATTTAAGTCCCCCGCCACAAAA  
 ACCCTCTCCCCTTTTTCAATCCTCTTCAAGTTTAATTTTTAGTTGGTCCATTTCCATAACAAGCAAT  
 AACTCATAACTGGGTGAATAATCTGTTTATACAAAAAAGAAAAAACAACAAAAA

AACGGGGAAAAAATATACATTGGCCGAACATCCACATCTGACTTCAAGTTACTCCTTCGAACTC  
CCTGGTGATACTTTACCTCAGAGCTTAATTGTTGTGCAATACATCCATCACATCTTCAAGTGCTAG  
GGGATGTGCCTCAGTGGGTAAGTCGGCCAGGTATGGAGTAGCAGGATTGTTTTATAGATGTCT  
TGCAACACTGCACGAATATCAGATTGAGCATCATCGGCCTCGGTCTTTATAAATGCTTGGACACC  
ATGACATTGCCCTGTGGCCTCAACCATTTCATTGGTACATCAGCAGCCTTGACCACTGGATCGA  
CATGCCCTGTGCTGACCCCAAACCCATCACTGCCTGGTCTCTCTTGAGCAGTTCTTGATGAAG  
CTTTCGATCTCGTTGCCTGATAACGGACCGTCAAGAAGATTTCGGAGTCTGGATTGCGACTGTG  
ACAGCAAGACATCGTACACCTGCCTGTCTTCACATACGTACTCGCCAACACCTGGAGAGCCACT  
GCAAAGTCTGGATTCACTTCGGCTTGGTTACACACAGACTGCTGTGCTATTTCCAGTTGGGGCTC  
TGGCTTCAGTAATGTTGTTGTCGTCGTTGATGGTGGTGAGAGTGGTGGTGAGATTGGTGGGGA  
CAGTGGTGAAATTGACTGAGACAGTACTGTACCAGGATAGGGTTTGTGTTACCATCTTGAGT  
GTATTGAGAAAATTGGAAGTGGTTGCGTGTGCCAAACCCGAATCTATTAATGAAAATTACAAAGA  
GTCATGTTAATAACAATATTCATTCTCCTTAGGTGGGTTTGTGGAAGAGAACTGTCTGTGTCTTGT  
CAGTCTGAGTGAGCCTTGTTTCATGGTTTCCAAAACACTTCCTTACACCAACAAAAGTACTTGCCA  
AAAAATCTGAATTTTCAACATAAACTGGTGCTGTTTTAGATGAAATATTTAACTTAAATACTACA  
CTTAGTCTACAGGTCTTTGCTTCCACAATGAACACAATTTCCCTTAAATTTTATTGCCCAAGGCTG  
CTCTGTGTAACATGATCAATCTTGTCTTGTAAACAATCCCATTTTGAAGTTTAACTGTATTTTAGC  
AGTCTGTTTCATGCCATGAAGTTTTTCTTGGCGAAAACATGGACTTGGTATTTGTCTCAACAAAA  
CTTAGCACAAGTCCATGCAAAATTTATTGTGGAAACAGAGATGAAGTTAAGTACTTACACATCTA  
CGTACAGAATAAAAAACAGCAACAGTTTTTCATAGCATGCAAGATTTCAATCATTTGGTCAAGGTG  
TTGCATACACCCAATTCCAAGCTTGCTGTGTTTTGGTAATCAAAATAAAGTTTTAATGTATGCTTAC  
ACTCTTACATACTTGTCATATTTCTGTACAACATGTGGCACTTTGTCTCAAGTGGTTGCAGCACAA  
TTGCTTTAACTCTTTGTCATAAGTAGTGTCCCACTTGTAACATTGTACTTTGTTAATAAAAGCTG  
GAATTCAGCAATTATTCAACAATGAACAAGGCTCTCAATGAGCTGGTCAAGTCTGAAAGACTCC  
GATGGATTCCAAGAAGACAGAAGCTGCAAAAAAGATTGTAGAGACTTCCAAGTCTTCTGCTGCC  
AAGGTAGCCATCTTTTACCTGAGACAAATGTCTTATTGGTTACGACACATAAAAAATGCACATTGAC  
AACTCAATAAAAAATAAAATATAAAAGTGCAAAAGGTTTTTAATTTTTTTTTTTTTTTTTTAAATAA  
CCAGGAATCAATTATTTGTTCCAGAATGATTGAGATTTCAAAAGAAAATTTCCCTAATTTACATG  
CATATTAGATGTTAATTTTTTAAATTTGTTTCCAGCTAGCATTGTTTTCTATATCTACTCTACCAA  
ATATAACATCTTTAAGTCATTCTAAATTACATTTGACTGAATATTACTGCAAAATCTGTTTTCAATC  
ATATTTTCAATCCTTTTGATTTTTTAAAAATTCCTTTGTTTACATTTTTCGTTCTTTTAAAAAAT  
ATGTATTGTCTTTGCCTTGTGTCATTGTATGAAGACCAACTTCAGCTGGTAGGTGGCAGCATTAT  
CTGCCAATTGTTAATTATCATTTTGAAGGATGGGGAAGCACAATGCTACTCATGTTAGCTATGTGA  
TTCAGTGTGAGAAATACCAGAAGACTCACTACCAGCTTCAGTATCTTACCATGGCAAACCAAGG  
CAAAGACGAGATTTTGTAGAATGATTAAAAGAACTTTTGTGTACTGTACTGTCTGCCGAGCCTT  
GCGACCTGCTGAGGGTCAGGAAGCACATTAACAGGATGGCCTGTTAACGCCTCAGCCGAAGTG

CTATGAGAGCACTGAACAATGCGTGCATTATCCGAAAGGCACTGAGGGGGAAGAGCAAAGTTC  
 ATGTGATGAATACATAACCCACCCCTCACTACTAACTACCTAAAGCCCAACCCACGGGTCAAATTT  
 CCAAGGGATGGGATCATCATTTACCCTATGTTAATCCATACAGGACAGGTCTCTTATACTTCACATT  
 TTATGAAACAGGGATATACAGAACAAACAGTAAAAGAATGTGGGGTTTTTTTTTGCCTTTTTTCA  
 GGCAAATGTGAATTTTGCAAATAATATATGATGTACAATACCACGTTAGTAATAACGTTTGATGCC  
 CAGGTATGATCTGGAAATGATCACTCTCAATCTTGTAATTTGTGCAAGTGATGTTTGTCTTTTG  
 ATGACTTTCATAATTTTTGTTTTGGATAAATTCAAACCTTTTTCTTCAATGTTTGGTCATGGAGAAT  
 TTCACTTCCAAGTCTTTGTATATATTTTGTTTTTGTTCATACCTGGATCAAATTTTACCATAATC  
 CAAATCAAACAGAACTGTTGATAAGACATAATTTGTAATGTGAGTTACGACCTGTCTTGCATCTTG  
 AACCCATTGATATCATTTGTGTACATTTAAGTTGGTATATATTTGGTAATTCTGAGGTATGACAAAT  
 TTGCAAATATCACAAGTTCAACTTGCTCTTAGAATAGAAAAATAAATCCATTTAAATCCTTGTGA  
 GCAGTATATTGTAGCCACAATCAATGGATTTTAACAGTATGGACACAAATTGGATAGTCTCGTCAC  
 AAGCAGCCAATGCTTTGAAAAATTGTTCTTATCTTGGTTTTGTTTGAAAAATAATTTTTTGGGTT  
 TGACAAGGGTTCAAATTCATGCTGCAAAGTCTACACACTATACCTCTTACAAAATATATACCAAC  
 AACATTTAATTCAACAATTTCAAAATATCACATTATGAAACAAAAATGCTGCAGATTGTGAAACA  
 TTTCAATTTTGATTGCTTTGAAAAAGTAGCCAGGAGAAAAATCAAGAAGAAAATTATGTAACACT  
 AACATCTTTTGTTTAAAATCATCTCAATTGTTTGCTTTTGGGGAGCATTTTCCAGTTTGACAGCAT  
 GGGGAAACCACACTGATTGAAATCTGCAACAATTTTATTTTCAAGAGAGGTCGTACATTAAAG  
 ATTTGCAGGAATATGAAGCACTCACATGAAATCATGGAAGGCAGTTAAAGGTGTTTCAAATGT  
 GTGCATCCATTTGACAAGTGAATCAGCATTTGTTTCACTGCACTTGTAAATATATTTTACTTTTTTGGTA  
 AGAAGTCTTGCAAGAATAGAATAATTCTTGTCAGTTTTGTGCTGTGTTTTAACTCATAATAAAAA  
 TGATTCATTGGCAAGTGGTAGCCAGTTTCTTATCTCCGGCAAGGCTCAACTTTTTTTTTTTTTTTT  
 TAGATCTCAACTTCCATTTTCATTTTATGTGCGAGCTTTACAGACTAATAGAAAATCATTAGCAGT  
 AATAGAAGTTGGCAAGTCTTGTCGAGTGATAAATACATCACTGGCAATATTTTGTTCGGAGTC  
 TGTTTGTACATGAGACGAGTTCAAGTAGTTTTACGCCTAATTTTCTTTTAAAAGGTACATTATA  
 CATTTGTTTATACCATTGGTACACATAAATTTAAGGCATTTGCAGGTTGAGAATGTCATGAGTTTT  
 AACGGCAAAAATATCACTGTCAGAACTTCCAAGAAATATTACTGCCAACGATATTTCAAATCGTT  
 TGAACCACCACCACCCTGCAATCCAAGAAATCTTGTCAGTAATGCAGCCACATGTTTCTTATTT  
 TGTCTCTTTTGCAGACCTTATTACAAAAGAAACATCACATGATAGAACATGGGAATGTTTCTCGA  
 GCAAGAAACAGAAGAACCATAATATTCTAGAAATTTGGCTTAGTATTTAGAAAAGAAAACTG  
 CCTCAAAGTCATTTCCATTCAATTATTTTACGTTTGCTGGGTTTGTGTTTGTCTATCACTCCTTGTAT  
 GCATCAATACTTTCTTGCAAACATGTGAAATGACTACTCAAAGGCACATCAATTGTCTAAGAAAA  
 CAGTGACCTCCTTCCATGCACACTCTGAAGGACTGACAAAAAATCCCTGCACGACCAAAAAACC  
 ACTTCTGGCCAAGACATATTGAAATGGTATCACTTACCAGGCTCTGGGATATATTGATAAAGTGG  
 GCGTCGGTATCGCTACATTTGTTTGGCCCACTTGTGACCACAACAAATACCTTCACAGGCTTCTT  
 CATGTGCTGGTTTGGGTACGGTGAATCTTGACACACGATGTGGGTATTCTGAAACAAAGACTTG

TCAATTTACAATCTGCCTCCCAGGTAACCTTTGCCAGCTGAATCCATCTGTCTGAGTTAACCTCC  
 GTGGTTGCTTTTGAAGTGAAGTTTTTCCCAATGATGAAGAGCTCTTCGCCACCTGCCATTGAAC  
 ACTTCGTCAGACTCTTCTTCACAATTTCCGGATGTCCGAGAGGTTGTGTGCATGTGATTGATCTG  
 GAAACCGTTTGTAGTATGAAGAATGAGCCATCTGCTGTGGGAATAACTGCTCTGAAGATCAAGC  
 GAACTGATGTGCTCTTCCTTTTCGACCTGATCGGGCCAATCCTTTGCTCAACATCTGCATTCTCA  
 ACTCAAGATACCAATGCAGTCAACACTTAATTCAAGTTTTCCATTTGTTGGTTCCCAAGGCACTT  
 CAAGTACAATTGTTCCATCGATATCCTTCTCCTCACACGGCGTAGTGTTGCGGCCAGTCACCTTGC  
 AAGCTTGGTAGTAGCCATGTGGTCTGATCTTTCCCTGGTCAATGCCAACGAACACCTGGAGAGT  
 AACTGCCTGATTACACCGTCAAGCTTGAGTGTGGGGTATGACTCTCCACTGTCATCTTTCACAC  
 TACCTCTGCTTCCCTCAGTCTGTATCTAGCTCTGTGGTGTCTTTCTGGCTGCACTGTGATATATAG  
 CTCAGCACCATTTTGCTTATCTGGCAAGTTCTGAATCAAACCTGGGAAATTTCTTGGGTCGCTTTC  
 TTGGTGTGAGTCCACATGTGCTTGAACAAGCAGCACGTTTCCCTAATGGGCTTGGATGTCTGTATG  
 GGAGCGTTTGTCTCGTCACCTCCTGACCTCTGTTCAACAAGACCCTTTGTAGAGCAGCTGTGA  
 AATCTATGGTTGAAGTAGTGGTAGAAATCTGGGGTACCACTGGACTTCCAGGGGACAGGTGCG  
 GGGAAGCTCCCATCATGGATGTCCGAGAATTGGTCTCCTCCTGTGGGTTTTCTGACTGAGGGCT  
 GTTCCACATTTCACTACAAGAGTCATCCAAGATGGAAACCAGAGAGCTCCTCGTCTCTTCTTCAA  
 AGTCTGCCAGAAAGTCATCTTCAGAGGTGAATGTACTTGAAGGTGTGGATGCTCCACCCCAAGG  
 GCTTTTGGCAGACATGGGTGATGAACCTTCAGAATTGGTATCATACCCAAGATCCAAATCGTCTG  
 CCATTCCACTTACCTCTGCTGGCACAGTTACAAGCTCTTCACCACTTTGAGAATCTTTTGAAATA  
 CAAACTCGTGACAAAGTGCTGGATCTTTTTGAAGTTTTACCACGTCGTTAGAAGGGGGATGAAA  
 GAGTCCTTCCGACGAAATTTGCCCCGTGAATAGAGAACAAATTGCCTCCCCCAAAGTCTTGAGAG  
 TCAAAAGACATTCTGCAAACAGATTTATGAAAAAACAGTCCCAAATATGTAATGGAGCGTAGG  
 TTTCAATGATCAAAATCTGTGAATTTCTGGCGTAGTTCCGTCCGTATCGAGAGACAGCGCACAAAC  
 TGATGAAATTTGGTCTTGCCTTGACAAAAAGCACCTATGTCGAAACATTACATCATCTATCTCA  
 ACGTTGATTGGCTAGTGATGAAGTCATCGCAACTGAACCAAT

# **>lim1**

ACCTGATCAGTTCATATAGTAAATCAGGTAGTATAAATTTATACAGCATTTTTTTTTACTGTGTA  
 TTTAATGTCTGGATCACGTCAAGAGGATTTATTTGCTTCGTTAAATAGGAAACAAAATGATAGT  
 GGATTGTTACATAACGCATGTTAATCACTACATTTATGAAGAGAAAAAAATTACACTATACACTATT  
 ATAATTAGTTGACGAAAAGGTGCCTGTTTATACATTTAAAAAATCGAACACACAATGAAACAAAA  
 AATCTCAAATATAGGCACTCACAATAATCAACTCTAAATTGCACATTACACCTGTGAATGAGAAT  
 TGTGTGTTTACTGTTGAGAGCTTACTGAATCGGCGCCACTTGTAAACCATAAACCCGTAGCTCCCC  
 AGATTTTTGAGCGTTTATGGGTTTAACTGTCGTGAAGATCCAGTTGTAGGAAACAATAGGTTAAA  
 CCGAATTTAGCCCGGCTATACGACATGTTTGCATACGACAGAGTTTGACGTATACAACACT  
 GCTAGGCCGATTGCATGTACGATTCGATATCCACGAATTTGGTTGTGAAATGACTAAAGAAACA  
 AACAAACTAGTAAATGTCACATAAATTTGGCAAAACATTAAGAAGTCATAATTTCTATGCTTTG

TTGATCGTGTATGGGTGGGCTATCCTATAACCCCCAATAAAGTGATCATCGTCATCACAAATTAGAT  
 GACGTCATAGTTAATCAGTTAATGTCAATATACGAGGAGTTTATTCCCTGGCGACGAAAAATTTAA  
 TAATTGCATGATGTCCAGTGAACATTCACGTCTTTTTTTGGCAAATATAGTTTATTTTTTTTTTCAA  
 AGCGCAGCACTTTTCGTCTCCACAAAATTGTTTCAGTTTCAATCAAATAATACTGCATCAATTTACT  
 GTCAGCCGACTGTCCATAATATCATTAGCCTCCTTGTCTATGGAGAAAACATCACGTGCGAAAT  
 TGGGCCCTGCAAAGTGAAAGATTGTCATAAATATTACAAATTGTGTCTAGGATATACTTTGTACAC  
 CGAATCCACACAGCTTATCCACAAGTGGAGATATAATATATGTCGCGTATATTCATTCTCAGTTCGA  
 AAGATAAAAAGAAAGGAGTGAAAAGTACGAAAAATCTATCTTTAGATTGTGTTCTGGTTCAGTG  
 TCACCACACGCCTTCGGTTAGTTCTTGGTGAGGTAAACCTCTAAACCCGTTTCCATGAGGAGCG  
 CCCCCACGCGGTGGTCCAAAGCGTTCGCCCATCGGATGGGGGTGGTGGGGATGATGTTGAAAC  
 AGATCGCCGTTTCGTGTGACGGGCGGTAAAGTGTGTAAAGGCTCGGGACTCGTGTTTCAGTTCTT  
 TGGCCGTGAGGTAATCCCCTCCCTCGGGTGGTAGTCCGCCGCTAGCCCGTTTGCAGAACGG  
 GGATGTGATGATCGAGCGGATGGTTGCCCTGCGAAACGGGAGGATGCATGTAAGGGCCCATGT  
 CCGTCGGCTGGACGGGTGCTTCAGAAGATGGAGGGCCGTTTGGGTGACCGGGAGGGAAGAA  
 GTCGAAATAGGCTCCGGGTCCGTAGTAGTCAGGATTACCGTCTGCGTCATAACTGAATGGCGGG  
 CTCCCCATCATGTCCGGGTATTCTCGACATCGAACGGTCTCGGAGAGGGCGCATGCGCCGTG  
 GATTCTGAAGAAATGATGCCGCCTCGCACCGAGGGCGCTAAGCTGCTTCATCCGCCTTTCTT  
 GGAACGCCGATTTTGAACCATACCTGAATAACCCTCATGTTGAGACCCGTCTCTGAGCTAGCT  
 GCTCTCGAATGTGTCTCGTCGGCTTGGGCGTGCCGCAAAAGCTGCTTTCAACGTCTCCAGCTG  
 CTTGCTTTGATGGTCGTCCGGGGCCCCCTCCTCTTGGCACCCGAGACGGGGATACCGGCCGCG  
 TTCTCGTTCTCGCGATTCTCGAGACTGGCCTCGTGGTTATTGTTATTGTTTCATATTGGCCGTTTCTT  
 TGGCCCGGTCCGAATCGTCCGGAGTGGTGCCCGTTAGTGTTCTAATGAGGGGGACGTGACATC  
 ACTTTCGGCCTCGAGGAGGCCTATATCCTCCGACTAGGGCTCTCGGGCGGCGAGCTCGAGTC  
 GTGACTGCTGAGGGCGGTGTTGCAAGATCCCGCGGCTTGTGAAATGGTCGTTGTGCGAGTA  
 GTCGGGTCTTTTGAAGTTGGCACTTCGTGAGGTAGTCTTCTTTGCAGATGAACTGGTTTTCTGCG  
 ACGACGTAGAGTTCTTCGCCGTCGAGAGTTGTTTTGACACACCATGCAGGTGAAACAGTTGA  
 GATGAAAACTTTACTTCGCGCCCTCCGCACCAGATCGCTTGGTAAGATGCCCTGTAAGCAGCC  
 CGCGCATTTCTGTTCCGTACCGTCTGAAGAAATCGTTTTTGCAGAATAGCTTTCCCTCTCTTGAGA  
 AACATTTCTCCGTGAGTTTGGCTTTGCACTCGCAGCAGTGACGCACTTTACATGCCACGGCCTG  
 TCAAGCACGTTACAGAGAAATCGGTCCAAAATCGGCCGGTCGCAGCCCGCGCACAACTGCACC  
 ATTTTCGCCCCAGAATGTTCTCGCTGTGAACGTCTTTTATTCCAAGCAGGATTGTCCGTGGATG  
 CGGCTATACACACCACCAATATCACTTTATGTTTCAGTATTTTTCTTGTCTCGCTGTGATTCTCAC  
 GACCCTCAGGCGATATGTGAAGGAAAAATCAGCGGCTCGCCACGGCGTGGTAAGCATGCAAGG  
 CCGCGGTATAACAGACGGGGACATGCACGGCGGCTTAGCTTTCTGCTGACCGGCACTTCAGCC  
 GTCGGCACCCGCTGTGAGTATGGTTTGGGTCCGATGGTAGTACAGCGACGTGTAACCTTTTTCA  
 CCGTCTTTCACCTAAATTTGAAGTTAGCACCTCTCCCCCTTAGTAGAGTTACCCCCAGGTGT

ACAGGTAACATGTGCCATGCACTTGAAAGAGGCGACGGTCGCTCGGCGGGGAAGCGCTGGTT  
 GATGATTCTTGTGCGAGTGCCTGGCATGGATCGTGGGCATAGGGGCAGAACGCCACGACCTCA  
 ACGCTGCAGTATGCCGGGAATTACTATACTCACTTGTTTGCTCAAAATTACAACACAAGTACATGT  
 AGCAACCACAACCTGAATAATTTCTCCCTTTTTTCGGACGAGACAGAAGAATATTACTCGTCTTGTT  
 ACAGCTATTTGCTGATAAATCAGCTCGGGGTTTCGGGTTACTGATTTATTCGGGAATGCATCTTCTT  
 GAAGAACAAGCTACACTTCCAAGCACACGCACAGGTGCATGTAAACACGAAAATACTACAAAC  
 GTAGTAACTGCAATCCAGCAAGATGCACGAGATTTCTGTCAAAACATGAACTGGAGCTATTTAT  
 TATTCTCTCTGTTCTGATAATCTTGCAAAATCCGCACACAAAACAAATGTCACGGTTTTCTGTAAAGA  
 ACTCAGTGGTGTGAAAATGATATCTGAGCCGTCGGTACAGGTGATGGGTAGGTGTCTGTGACG  
 GGATGTCGCTGAAAGACAATTTCTGACTTCTGTGTTGCTCGTAGAGGCAGGTCTACTAGAATG  
 GATACATGTTGCGACCGCTGAAGTAGTAGTAGTAGTAGTAGCAGCAGTAGTAGTCTACATCTTAC  
 AGTGGTAGCGCTGTCTAGTGACCACGCAGCGTTATACCACCCGTTGCGACCGGTCTCTACACTGT  
 GTAGT

**>bra**

CGGTTATTCAATAAAATCATACATTCTCACTCACAAAAACACAAAAACAATAATGATCATCAAATTA  
 TTCACGGACATATCAAGTTGGTAAAATTTGAGGAAAGTACGATATAATGAGGCAACAATTTAAA  
 TTCATGTACACCCATGATCGATATTTATTCCACATCATTTTTACATAACCTGTACACTAACTCCGAA  
 ACTGTAGCTTTCAAAATATACATTATCATACAACCTGGCTAAGTTTATTATTTAATAGCTATTTATTAC  
 AATGTATATACCGCGAATACGTAGGCTATCATATATATCAATTATTTACAAACAAATCATTTCTGCAT  
 TCACCATAACTTCTATTCACTAATTAGAGCTATATATACAAGCAATAAATATATGATTTTTGGCATTTA  
 AGAGGTCACAAAATGCATTATTCTGCAATCTGCAACATAGCTATTTTGGGGTAACAAATTGATTGT  
 TTAGCAACCAAGATCCGTTTAAATTTGCCTACGGCGTTGTGAATAAAACGCCTTTGAGTAAAAAC  
 GGTATACATACACGATTTGAATACATTTTATTTGATAAGCTAGTGTTTCGATGCAGTACATGATCAAT  
 TTTTTTTCATGATCTATAACAAAACCTTATCGGACATTCGGGACGATTCATCACTGTTTTGGCATTAA  
 ACAAGCAATCTGACAAACATTTGTATTTCCATGAGGTTAAGAGTGCAATATTTTATTTTGAATGTA  
 GTTAAAAGAAATAATATCCCAACAAAAGATGGAAGCATTGCATATAATATCGTTTTAAGTCTTCGT  
 TGTATACGAAAAAGAAATTGTCGTGTTACAAAGTTTACGCTCAGTTATCTCATAAAACAATTGAGT  
 AGAACACTTCAGTCAAGGGGGTAAATAAAAGGTAACATCCAGAAGAGAAATGAGCTCATATGG  
 CCACTTGGCTTTTTGTCTTTAAGTTTTATAACATAATGTCAACAGTAAAATGAAAAATACAAAAAT  
 AACACATAAATAACTAAAACAAATCTTAGTGATAGCCCGCTACCACAAGCGTTGGAAAAATTCAC  
 CAAATAAGCATTGTTGAATAGATCAGAAGCCTCTTTTTGCCAAAGCTGTTTATCTCCATAGAATT  
 ATAACAAAATATACAGTGAAGCACAGTAAAAACGACACTTTGAAGCAAAAAACAAAAACAAAA  
 AAGCACAAAAAGATAACAAAATGCAATTACGCCTATCATAAATGACACTCGTTGGCAGCTCTGT  
 TTGCATCCTACACTTTAGATGACACGAGCATACAACCTCGGGAATACTGATCTAAAGATCAAATCGA  
 TACTAAAGTGACTCCATCCGAGTTCATACACCATACAACATTTTATACGTTACATAAACCGGCATG  
 GCATACCATTCTTTTTTAGCATACAGCATTTATGAAAGCGTCATTCCACATTCTTATCACGTGCTTT

ACCATTATTGGGTAAATAATATCTGCGTTCATCACAATTTATTTTCTTTAATATTCAGAAATATCGCT  
TATGTCAACTGATCTTGGTGTGCAAGTGTTACCGTGATTTTTCCAGATATTTTTGTAATACTACGAA  
ACAAAAATAAATTCAGGCCTAATTAGTACATGCGGCAATTGACTTGTTTGGTATATTACTGTTTTTA  
CATTTTTACATGGTTAGAGTCGAAATATAGATGTTCAACATGTTTACATTATCTTATAATTTATATTCT  
CAAATAGTTTCATTTAAATTTGTATACATTCGCAAATAGTTTACACCGACGGTGGCGTCAAAGGGG  
TCCACGGAGATGCCGTTTTACTGACGAGATGCTGATGCGGTGAATTCTGATGATGAGACGTCGC  
ATTGCAGCTACCGTAGCCACTCACATCGAGTCCCACCGAACTGCTAGCAATATCGGTGTAAGTGT  
CCTGATAGCCCGTTTGGTGGCAGCAGAGCCCGATGGCGACCCGTTTCATGTTATGGGCACCTGT  
CGCTGAAATCGGCGCCAAAACCGTCGGACTGTCTGCGTTAGATAACGAAGAACTGGCCGTGGT  
TACCGCGGCGGGCGACATACCCGTGGTGGCAGCTACAGTCGAGTGGTGGTGGTGGTGGTGGT  
GTTGCGGAATAGCCCGTTGGGATCGCAGACTGTGGCGAACTCACCGGGGCGAAACCGCCGG  
TTGTAGCACTCGTTGGCCACATGCTGCCGTACTGGTTACAGGGAGACGGCATGGCATTCTGCTGC  
GGATGTCGCACTCGTGAGACTGGACCAGCCATCGGGGGCGAGGAGGGATATGCCGCCGGACA  
AACCAGATGAGGAGTCAGATCCATAGCCAGTGCCGCCAGTGGAGTACTTCTGGTGATAGGGAG  
GCGGTGGATAGGGCGACGTACGATGACCTCTCAGGCCACCATAACCGCTCGCAGCCGGCATGAG  
ACGGGAGACCGAGGGACGGAGCGAACTGGTGAGGGGACGGTCCGAAGGCACCCGACCCAG  
GGAGAAACCAGCCACCCAGTTGTGGATATCGGGAACCTTGTAAGTCGTGGGCATCGTCGAATAA  
ATCATGACCTTCATTTTTGTCTTTGATGTCCAGAAAGGCCTTGGCAAATGGGTTGTATTTGATCTT  
GAGCTGCGTTATATCTTCGTTCTGATATGCAGTGACGGCAATGAAGCGAGTTTCTTGAAATGAAT  
AGCTGCCCACCACTCTCTGTTTCTCTCGGCCGCCACGCGGATAATGTGGACACGTGGTTCGTAT  
TTGTGTAAAGAATTTAACATGACCTGTCCACTTCCATTACGCTTGTGGATAACTTCACTTTGCTG  
AAACCGACCGACTGCTTCATCCAGTGTGCGCCGAAGTTGGGCGAGTCGGGATGAATGTAGGCG  
GTGCTCGGCGGCGACGCGTCGGGCTTGCCGCCCGGCACCCACTCTCCGTTGACGTACTTCCAG  
CGGTGGTCATCGGCGGCGGAGAAGTCGAGAAGGATGGAGTACATGGCGTTGGGGTCGAGGCC  
GGAGATGTTGACGGACAGGACGGGGAACATTCGTCTCCCGCTTTTTGTGACGATCATCTCATTT  
GTCAGTTTATGGAATTTCTTCCAAAGATCGGTTTCTTCCAGGCGGACTTTGAGCCCTTCTCGCT  
GGGGTCCCCCTTCTCGCTTCCCCGATTCATCTCCGACTGCACGGCGCTCAACAGGTGCGTGACG  
TTGTACGTTGGTGCTCTCATAGCTTCCGCGCTCATTGCTGGCATACTGACGTAAATGTCCAGAA  
CTTATTCAGCAGACGATAAGTTGCTCTTGGTATCAACAACTTCCCGCTTCCAAAGTTTTATTGAAA  
ATATTTCAAACCTGGAGATTGTTTCTACATGCATTAACAAATTAAGTATAAGAAAGATACAGTT  
TTCAATGTAAACGGATAAACGAAATCTTAACAGACTTGAGATTTGGATACTTGGAAAACACCTGA  
TGAAATTACCGCTTTATTACAGGATTGCGTGATTACCAGCTGATTCTCTTGGACTAAGGATTTGCT  
GTGAAAAGGGTTCAAGTTAAATCCCATGGGTCTCGGCGTTGAACTTGAATCGCGCACTGCTC  
TAAGATGATGAAGTAATTACCTCTGTTGGCGTACTGGCCCCGCTTTACGATTGGTGAGCGTTTTAT  
ACAAGCGGTGCCACAGCAGTCAGAAAGCTAAGAGGATCTCAGAGCACGAGTCAAGTCCATAAA

CCACGAATCACTGAGCAAGCTTTTGAGACTGAGAGAAGTCGTGAGTCAGACTTTGCACGGATC  
GTCCAATTTTAAAGCTGACCTAACTGTAACACTGTTTCACGACTA

#### >ets4

TGGAAATTGAAAAGATATGACATCATTTTTGCGGGAATCAATGGTGATTTGTGGCTTGATTGGA  
TGGTGTAGGGGCAGGTGTTATAAAGCAAAACGTAACCTCGATTGACTAGTCATTTCAATTCTAACT  
CTTCAGCGGAAAAGACACATCAACAAAACCTTGGATTATTAGCACCAAACTACACGACCTACGG  
CGGTCATAAGTGATTAGAATACCCGAATCTAAACCAAAATCTTACAACAACATCAGGCAACATGT  
TTTCGACCGGCGAAGTTTGCATTGTTTCACCAACACCGATCACAAGCATCGACCCGGATGCGGC  
TGCCCTTGCTGAATTGGACTTGGGCAGTAACCTTCTTGATCTAGATCTGGTCCAGGATCAACAGA  
GGCACAGAATGGGCGACACATCCAGTCCCTCCGTCTTCAACTTCGGATTCCCTCCCGCTCCCGA  
AATGCAGGGGCTCTCTTTCTACCAGGACCAGCATCCGGCCCCACAGGCAATGATGGGCCCTCCC  
ATGTTTCCACAGGGGGGTTTCGGCAACATGCTGAGTGAGATTGACGAGAGCGAAATGGCCAGG  
CTCCTGATGCGCGAGATGATCCCAGACATTGTAGCAGATTGCCAGATGCTGAACATTCACCCAAA  
TTTGTACACATGGTCACCGGAAGACGTGCAGAGGTGGATCCAGTGCCTAACGAGGCGGTACGA  
GCTCGGCGACGTCAACCCCATGCTCTTTCATATGAGCGGTGCAGCCCTGGCGTCGATGAGGGAT  
GAGGAATTCAGGGAGAGGGTGCCAAAATGCGGCGACATCCTCTTCAGCATCGTGTACATCTTGA  
AATCAGCTGCAGGTGTGAACATAGACCAACACCAGGTTCAAGTGGTACCTCAGGGACCCTTCGT  
GCCAAGCGTACCTGCACCTGTGGTGCCACGACACAAACCGTGGTTCGCGCCACCTTTGACCCA  
CACCAGATGACGCCAGGCCCCGTCTCACCGAACGCAATGCACAAAGACTACGACAGTGGCAGC  
ACAGGCTCACCGAGTGATGATGAGGTTTCCATCCCGTCGCGCCCGCCCGAGCGGTCCCAACACGT  
CAATGACACCCAACCACACGGGAGGCATTGAGCTCTGGCAGTTCCTGAAAGAACTCCTCCTGCA  
ACCAAACCTCGTACAGCTACTGCATCAGGTGGTTGGACAGATCACAAGGTATTTTCAAGATCGAG  
GATTCAGTAGAAGTCGCGAGGCTGTGGGGATTGAGAAAGAACCGTCCTGCCATGAACTACGAT  
AAACTGTCCCGATCGATCCGCCAGTACTATCGCAAAGGAATCATGAAGAAGACTGAAGTTTCGC  
AGAGGCTAGTCTACCAATTCGTACACCCCTGCTGAAAAAGTGAACCATTCCATTGCGCGCTCGAC  
GGACATTGTTGATCAGACTATTTGAACATCGTGTATTTCAAACCTCGCATGTATGCGTCCGTGCAAA  
ATGTTGTTCAAGTCTTCCATTTGACTGTGAAAAAAGGGGGTGTGGAACTTTGAAACGATGAC  
ATGTGCGCGATCTTTGTAAATACATAAACTTGTAACTTAAGAATGTAAAAATATCGTGAATAATTG  
AAATGTCTTGCCGGGGTGTGACACTCGTAAAATATTTGCTTCCATTATTCTATTTTGAGAATAGT  
TGGAACGGAGCTGACTTGCCTTTAACTATATTGAAGATATTTTCTGTCTCACAGTACTAAATTA  
AATCAGTAAAGTAGCCAACGATATATTGTTTTAGAAATTTTCTTTAACAAAACTTGCTGCAAGC  
CCACTGTTTATTTAATAGTGGTCTTTTGGACAACCTCTATTACTTTTAAACGTGCATGTGTACGATT  
TAAGTGCAGTTTCGTTTTACTTCCAACCTATTTGTGTCCAAACGGTCATACAAAGTTGCTCAAAAG  
GAGAAGTGTGGTTATTTTGTGTAATATTTTATTACTTGTCTTTTCTCAATCATCAGTTTGTCAAT  
ACCCTTGTTTTATAGACGGTATTAAGTAGTAGCTGTATGATGATATGTAAATATTCTTATATTTAGTA  
ATGTTGATTTTCGGATCATTTTTACTTGAACGTTTAAAGAAAAATCCTGGAGCATGTGCTTCAGC

AATTTATTGATGACTGTTAGTCATATTATGGGTATGTTCCATGAACAGGCTGAATTTTGTATGTAAT  
TATATACCATGTTTTTAATTGAGACGCTTTTATTCAACTACTACTCGTACATTGCCGGCCGCGGAGT  
TTAGCTGCGGCAGCGGGGTTTGGCTGTATAGGCCTATACCGTCGTATGGGGCCTGGGCGATTTT  
CTTTCCGTGTGCTCCGTGTTTCGGAATTAAGTACTTCTGCGGAAAAATGAATATTAATAAAAAAG  
TTAAGAATAAAGGCGTCTTGATATGTACTAATCGATATGATTGTAAGTTTGCACAAATATTTAACGC  
AACCGCAAATGTAGTATAGGTGCCAAAGTAGAAGTCTTCAAATAATTCAATCTTCTGTTACAATTT  
ATGCTTCTAAATAAACATGGTTAATTTCAACTTTTTTTTTTCAAGCGGACCGCAAGTTGTGGTTGCT  
TGCTTTTAAGTTGTATGAATTCGTTTACCAAATCGAAGTTTAAATTACATTTGCTCAAGTGGAATTT  
ATTTTTTCAGATTTTGTAAATTATTCTTGGTGGTTTTGTTCAATTTTCTTCACTCAACATACCGATC  
AAATTTAAATTCGCAAACAATGATATTCTGCAATCTGTAGCAAGTTACTATTCTGCAATCTAACACG  
CTTTATCAATTATAATCGGAGTTATCAACGCAAGCAAAGGGGATATGAATTTGATTACTTTGTTATA  
TGTGATTTGAACAGAAGTTTTATTACTAAATAAAGTTTTATATATTCCTAATAATGCTTCAACATAT  
ATATCTTATTGAGAATAGGTGCCAT

#### >z246-like1

ACTCATTTTATTATTGTAAGCTTTAGTATACAACCTTGTCACACGGCAATATAGGAGAAATATATACT  
TTATATACTTGTACTTTAACATCAGATATGGTACAGTCATTGTCATTTACCATGTCTTGTAACAACCT  
TTCACTGTATATTTAACATGGCTGGATATTAAGGAAATTATTTTTATTCTCGCTTTCGTTATTACATC  
GTTAATCGTTAATTCTCTGCCAGCTTATTTTGTCAATTTTACATTATACACAACAAATATACTTCAAC  
AATAGTTACAAAATAGCATCATTATGCAACATAACTTCGAACTATTCTTACGGTGTAGGAAAAAA  
TGGATAGAAATGAATGAAGTCTGTTTACACTTGAAGTTCGTGCCAATTTGATTATAATGATTATAAT  
GATTACACATGTATATTTTCGATAACGTCATTGTTTACAGTAAGTCGGTGTACTATACTTGGGTAAAC  
ATACCTGAGCATAAGTTTAAAAAATAATCGTATAAAGAAATACAAGAATTGTTTTCCCCATTGT  
ACAATACTTTGTACAACCTCATATTTACAGTCGTCTATATGGTGCGAATGACACATTATTCCAACAA  
TGATACGATATCTTAACTTTCTCCAAATGTCTCCAGTTGAGAAAACTACGACGGTCAAGAGATA  
AGATTCTTAAGCGCGTATTTTCGCGGACAAAACATTTGTATCTTCAATTTATCACAAAAAAGTCA  
CCAACATTATTCAAGCGTACATTACGTTGTTTAAATGAATTGTCTTAATATAGCAATGACAGTGTCA  
AGATCGTAAGACTGGTCTCACAGGTACAATTTCAATAAACGTGGTATCACTGTCAAATCAAATATA  
CCATGGGGTATGACAACAGGGTTATTTAAATATCTCACTTCCACATTCGTGAAGAAAAGGTAATAT  
TCAATCAAATTCAAATTAACGTAATGCCATCTCAAGTGATACACTTTGAATTCATAGAAATCAA  
AACTAATAAACAATTCAATCTTGACATTGGGCTGGTCAAAAGAAATAACGCGTGATATGTTGATG  
TATTCTGCTTTATATGTCCAGATATGTGGTGGTTATTCCATCTTCGGCCACTTTGCGTTTGGGGTAG  
AAGAATGTGAATGCATTTGTTCTTGTCTGACGTGAGTATGTGGTTGTCTTTCACTCTGAATCCG  
CGATTGACTGCCGAGTCTGTTATTCGCTCTCGTAACACTCGCTTGATTCTCAAAGTTGATGTTG  
TTGTTCTTTTGTGTTGCCCCCTGCAACTGAATTTGTCTTTGGAGCCAACGCCATACCAAGTCTTA  
CTGCACAGTGCTACAATACCATGACCTTCCCATTCTAGTTTGAATAGACCCGGTGTTCGTTTATCAT  
ACCGTCTGTGCTCCTCCGTGTGACGTACGGGGCAGCCAGTGATGTTTCTCGTCTCAAACCGTTCT

CGAAGCTCGGGTCTGACCAGACTTTCAATACTCGCACCAGATAAGGCCAAAATATGCCGAATCGG  
 TGTCATTGTAACGTATTCAAAATCAGATCTGTCTAAGAAGACATCGAGAAAAGTCAAAGTAGAAT  
 TGTAGCATTCTCAGCTTTGCATATTGGTAGACGAAAAAGCCAATCTGAATTGGCAAGTCGTGTGC  
 TATTTTGTCTTGGACATTTCAACTTCGTAACAGTCGTCAGTAATGGTGTTCAGGTCACGGAACA  
 AAATCTCATTGATAAGGCGACTAGCTTTGGAAGAATCCGTGATTTGATTATTTCGAAATCTGGTCT  
 TGTTGGTGATAGTTTTCCCGTAGGAGGAATTCCCCATCAGCTTCATGGTATCTGCTATAACAGACT  
 TTGAAGGGTCGCTATCTCCAGCTCTACGCGCGTCAGAAACAGCGTCGGCAAATTCAGCGAAGCA  
 TCGAATCGGTTTGATTCTACTACTTGGTACACGCGAGTGATCACTAAACCGTGTTCCAGGTACCA  
 TTTTGCAAGTGGTGTGGCGAGAAAAATTTCTCACCGTACATGCTGCCTATCAAATCTTCTGG  
 GGGTGTTCATGATATTATGCTCTTCCCCGTAAGTTTTTCATGTATGACCCAATATCATCCGAGAAAT  
 ACTGGTGTTTTTGAATATGGGCGGCATTTCCGCAAAGTATGGTTTAAGATGATCAGGAACATGAA  
 TATCGCATTGATAACATCCAAAGAGATTGCCTGCTAGTATTTTCATGTATGATTTTCGTCTACTGATAG  
 TTTTCGATTTGGAATCGAGTGGTTTCTCTCTCTCTGAAGAAATTGCCTGAGTTGGGGATCGCTTT  
 TTTTCATACCATCGAATTGGCATTCCCACATTTTCATGAATTCATACCCAATGCTTCGAGATACTT  
 TTTCTTCTCCAGAGTTCTCGCATACCTTTGCCGCATCTCATCTTCAGCATGACGAGGGTTCTTTTC  
 GCAAGCATGGCCATGAAAGTAGCAGCCTTGAAATTCGAAGGCTTGTTTTGTCTCCGAGCACCAG  
 CCATCGACTGGTAACATACGCGGACCTAAGCGCTTCTCCGAATCGTTGCCTTCGTGCCTTATCTTT  
 ATTCCACGTTTTCTGCGCTCCCAATCGAGCCAGTCTTGAGCCTTTATCGAAAAGGGTTTTCTTTC  
 TTTTTTGAAGGAGGTTTTCTCCTTTCTTCGTGTTGGATAGCCGGTGGGCATATCTTGGCTCAGAG  
 CCCAGAGATACAAGGCATTTGCATCATAACCCTGAATCTTTTCACAAAGTTTACCACCTCGTATAC  
 GCGTTTCACCCGCTTCGTGATATCGCGTAAACACGATAGAGGGACCGCCACAAGATTTAGTCG  
 GAAAGTCTTGACAGATCTTGATCTTGATTGCCAAATAGGGCAAAGTTGGCAGATGGACTGATG  
 TCAAAGAGATATTTCAACGTTAGGCCAGGAACAGAAATACCATCCTTGACAGATCGATATTTCTT  
 TTGCGATATGTTTCCGCCATTTTTTCAATAGCTTCCACAAACGGTTTCACGTCTAAGTTATTATACC  
 ACACCAGATAGTCTCTCATCGTTGACATTCCTTCCCGCTGCCAAACATCTTGACAATGGGCGTAG  
 TCTTCATCGGTGAGAGAGGTACCTCTGAGAGAACTGTCGAAAGCCTCTCTGGGTGGAAGAGAC  
 GGATGGTCAAGTTTATTGAAATGCATCCATTCGTAGGGAAATATGCCCTTGTCATGGAGCAGTC  
 ATAGGCACGGAGAACTGATCGTAAGAGAAACCGGGAGCTAGAAAGTTGGTAATGTCTAAAAA  
 GCGCAAATGCTCGGTGTCAATGGACATGTAATTGTTATTTCTTTTGACCAGATGTTTGATTGGTTC  
 ATTTTCAACCAGATATGGGAGCAAATATCTCTTACCAAGTTGATGTCATAACTTCCACTATTGAAT  
 CCAAAAACAGGTATTTGTTTCAAATGACTGGTAAGAGAACATAGCAGATTTTGTAAGTAGGATTT  
 TTGTTTTTTGTTTTCGTCATCTTCCCCTAACTTCTGAATCTTTTCCCTTAACTCGCTGATTACTCCAT  
 CAAATTGAACGGTCAAGGTTTTATACTTTCTTGGCTAATTTTCGATGAGATATCGAACCATATCCC  
 CCACTATTTCTCCTGGTTCCCCTCCACTAACAAAACAAACGGCTTCTTGATAACTCGGTACGTTGC  
 TGCATACGCTAACACTTAGTGGTATGTGTTACGAGTCCACGTCAATTTATCACCGCCTGATTTCT  
 CCGTTGTCATTTCCGAGTACGACTCGAAGTCAAAAACAGCAAAATGGGGAAAATAATCCCACTC

GTTCGGAATCTCAATGCCTTCCTCTCGTATCTTGTCAAACACGGATTGTGAATTCACGAAGACTCC  
 TCCAGGATACACATCGGTTGTGCCTTTGCACTCGCAGGAAGCTTCATGACGATGTAAGTCTTTG  
 CTGTCTTCCACAGCTTTTGACACTTCCGGCACAACGAGTGATTATACCTGTCGATGTTTCTAA  
 TGTAGCTGAAATGGTCTTCGTACAGGTTTACGTACAGAGTAGTCGCGTGTTCGAAACTTCGA  
 CGAACGAGTCTTGCTACTATTTCTCCTCCATTTCTCTCCTCCGATTCCGGCTGTGTCGGCATCCCCG  
 GCTTCCTCGCTTTTCCATCTCGTTCTACAAGTTCGTAAACCATGATGTTGATCTTAAACAGATCCT  
 CGATGTGATGAAGTTCACTCAGTTTAACTCCTTCGAAGTTGCTGCGAGATCGGGTTGTGTACTTT  
 TCGAACAGATTCAACGTAGCATTTCGAGCGCCATTGATGATGACCTTGGTGAAGGGCTATGC  
 AGCGAAATAAGCACAAATTGTCGGTGTAAGTTTTTGAGTATTGGGGTTTTTCATGAGCGAAAC  
 GATGTTTTTGTTCCTAGTACATAAGGTGGGAGGAAGGAACAGGTTCCGATGGGATGGTCTCGG  
 AGCTTGATACAAAAATGTCACGTTGCTAACAGCATCCACGATCCATTTGGAGTTGGGACGTTG  
 TAGCTTAGCGTATTCCAATGGATCCAGCTCTTCAAGGCTCTGAGAAAGGATTGGAACGTAGCAC  
 GATCCTTTATAAAAAATGGGGTTTCATAAAGTCTCGTGTTCAGATGAGT

# **>nfe2**

AAAAGAATGCTTCGCTCAGCAGCTGTATGTAAGTTCGCGCGAGATATACAGTGAGCAA  
 CAACATCTACGAGCGAGGGGTAGTGGTAACGAAGTATACTCAGGGAGGGCTGAAATTACACAC  
 AAAATGAACAGAAAATCGTGACCAATGTAAACGTTTTAGGGGAAACAGCAACATTTCAACAACA  
 AAGCATCAAATCGTCGAAACACCACCCTGGACAATTCCACACCGTTGATTATATCCGCGAACAA  
 GCGACAGACTTGGGACGTCTTCGTGTACATTCCACACATACCGTGTGTAATGGTGCAGTACAT  
 AATACGCCGACCCAGCAGTACTACAGCAGTATAGCGCACACATCACAAGCGGGACTTGTCAAAT  
 AATACCACTGGACTGGTATAATAATTATATATTCTATTTATTGCTATATTCTGAACATTTTGGGTCCG  
 GATCGCATACAAGTACACAGTCATGATGGATTACGATTTTGCTGAAATGGGCACCGCTGTCGTGC  
 CCCAGAAGACTGAACCTCAAATAGAACTCAACAGGACATGGATTTGATCGAGAGTCTGTGGA  
 GGCAGGACATAGACATGGGGGTGTGTCCTGACACGTATCCATACAAAGCAGACATCAACAAACC  
 TGGTTTCACTGACGAACTCAACAAGCAGGCCATCGATTTGTGGGACTACAGCATAGATGGAGAG  
 ACAGGAGAGTACATGCCTGGACCTCATCCGGCTGACAGCGTTCAACCGTCTCTCGAGCAACCTG  
 TTCCACACCAGATGCAGCAACCACAACCAGACACACAGGAGAGCAGTCTATCGCTGGAGGACT  
 GCTTACAACCTGCTGGAAGATGAATACTCGTCAGACGGTTCAGCGTCGGAACCTCTCCCCAAGCCT  
 CAGTCCACAAGAAGTGGAACAAAGGTGGCAAGATCTCGCCACCATCCCAGAACTTCAGGGCAG  
 CATCCCAGACTACCTGTCAAACACAACCTGTGGATCCCACACAAGAAAGCTACGTACACCTCCAC  
 AACTCTACTTGCAGGGCATGACCAACGGGACGGGTGCACTCACATCGGAGGTTAACGAGATGC  
 AGGCACCCCAGATGCTGAGTGACGTTTTTGCTGTCAACGCCTCCACAAATGGCATGGTGAAGTCT  
 GCAGAATGCCACCCACTCACACCAGCAGCCGTTGCTGATGCCACCGCCAAACAACGAGACATTC  
 AACAACCTTTGCCAACCTGAATCTGGACTCGCCGCCTCACTCCGCCAACAAACACCAGACTGCCT  
 CAAATGACAACATCACCGAATACTTAATGCAAACCCTGCAACAACAGATGAGCTCAGTCAACGC  
 CTCAGCCCCCTACACGTGAGGAGTGACAGACAACAGCAGCTCTCTTGTGATGGAACCTCTGAAC

TCACCTGGTGTCTGCACAGCCAATTAACCCCATGGACTTCGACTTTGATGAACAGATGCAGGACG  
 TGCTGGCTGCACTCGGAAGCGAGGCTGGTGATGAAGCACTCAGTGATGATGAGGATAGTGATG  
 GTTCCACATTTGAGGAAAGTGAGGGTGCTACTGGCTACTCATCAGGATCTGACCAAGGTGCTTT  
 CAAGGGAGCCACTGGGGGATTGGTGCTACTCAAGAGGTCATGAAAGACAATATGGCAGTGA  
 CTCCAGCAGTAACAGCTACAGCAGCCAGCCTCCCAAAATGGAAAACATCAAGCACAATCACTCA  
 TATGCTGCCTCTTCGCAATCACAAATGCAAAATGGTAATGGAGCGCACAACAGTAGTATCAATGG  
 AACAACCGCCGATCAACTGAGATACAGTCGTGACGAGAAACGCGCAAAAGCCCTCAAACCTACCT  
 ATCGGTGTGAAAAAGATCATCAATCTACCTGTGGACGCGTTCAATGATCTCATGAAGAAGTACGA  
 GCTGAACGATGCCCAGATGCAACTCGTGCGTGACATCAGGCGCCGTGGTAAGAACAGGTTGC  
 TGCACAGAACTGCCGCAAGCGTAAAATCGATGCCATCATGATGGTGGAGTCAACGGTGAGCGA  
 GCTGCGCATGGAGCGGGACAAGCTGGTGAAGGAACGCGACAACATCGACAAAGAGGTGAGC  
 GAGATGCAACAGAGGTACGCTGAACTCTGCGAAGAGGTCTTCTCCACAATTCAAGACGAGCAC  
 GGGGGCCCCGTCGATCCCAATGATTACACGCTGCAGCAGTTACCCGATGGCACCTTTTACCTCAT  
 TCCTCGCAACAGCAATGCTTCAACAAGCAGAGACAGTGACGAGCAATCAATGTAGATCTCGCTT  
 GATAAAAAAACTTATGTTATTGACTGACAATATCTTGGGCAATACACGTGGCTGTCGTGTGAAG  
 CAAAAAGAAAACCTTTTCTCAAGACAGCTGAACACTCTGGAGAAATATGTTGTCCTGTGTTAATTT  
 TCGGAACAATATTTACCCCATTTGCAACATCTGTAAGACTTGCTGACTGTCTGGACACTTTTTTTT  
 CAAGATGAAGTTGGAAGTTTGACTGATCCGTAAGTCTCTATTTTTTTTTTCTCCTCATCTGAAA  
 TTTTAAGAGTTGTGTGTTTCAGAAAAAAGAAAAAGGTGCAAATGGCATGCCACCCCATTTGAGCA  
 CAAGTACTGACCCATATTGTTACCTCTCTCCCTGCAAACTACTTGTAACATCTTATCGCATTGAATC  
 TGC

#### >cebp $\alpha$ L

GAAATCCCCGCGGATTAATATCCGTGTGCGTTGAAGCTACGTACAACGACGTAGTGGTAATTTATA  
 TGCACATATAAAATATATTCGCGACATTCAGCTGGTATCTGTCAATCTAGAGAATTCTAACCAACGT  
 ACGGTCTAAAGTAGAATTAAGCTTATAAAACGTGCAACCGCTACGTGATTTTCATCATTTTCATCAG  
 TTGCTTCACTCACATCCACTGCAGAACATTCGAACAAATCAATGGACTTTTATTTCAGATACAGTT  
 TCACGATGTGTCAATGGCATAACCATGGATTCACCTGTAACTTCTACGCCGATGTCGAAAAGCA  
 AGTGAAGGAAGAATCATTCGCCGTCGATTTTCCCGAAGAATCTCACATGTTTGGTGATTTTGTCTG  
 GACTCTTGCAGAGCGAAGACTCTATCGATTTGCAGGCATACCTGGATCAAACCTAATAACACTCCG  
 AATACGAACAACGGCAACGACTACATGCGTACTGCTACGAATTTCCCAACTCAACAGCACATCAC  
 GCAGGAAGTCACGCCCCGAGCTCCAGGCGCACCAACCCTTCAGCAGTCCGTAGCAGAGCTACC  
 GTTCGCCAATCAAATGCACGTTGACGACGTGCAGCAACAACAGACAGTATACATGCCGCTCACG  
 ACCATCTCGAAACGCAACTCGTCAGTGAACAGGCAGAACAGCCATCACTAGTTTACCACAACG  
 ACAACTACATGATGAACGGGTTGAAACTGACGGCAGAGGCAGCACTGCATCCAGCCCCGGCA  
 TGCCAACATCCAGTGGCACGATGGAGCAGTCCCAAGCTCCATCCCAGTCGCCATCATCGGGTAA  
 AACCTCGAAAAGGAAGCGACCTGTCCCCAACCGTGAGAGCGACGAATATCGACTCAAACGAGA

GAGGAATAACATTGCGGTGAGGAAAAGCCGAGAAAAGACAAAACAGAAAAATCAGGAATTGC  
 AGCATCGTGTTGGGGACTTGACAGTCGGAGAATGCCCCGCTCAACAAAAAGTTGAGATGCTGA  
 CCAAGGAACTGACCGTCCTGAAAAGTCTGTTACAAACGTGGGCAAACCCGTTCCAGTGAAAC  
 TTGAAAAAGCCCTCGAGTAATTAAAGGTAACGGAACCTTGACGAAAACGATCAATGTGTGAGAT  
 GTGCAAGGCCCAAGCTGCTTCAGATCCTGTTGATTGCGACTGGTTGATTGTACCATCATCTTTTG  
 GACATCTTACAACAACCTCGGTTTTCCATCTGAAGAGGCGAATGGTGCAACGAGTCGACTTATTG  
 GTTCAGTTCGACATGAGAAATGTGTCGCCAACATTGACTGAATATGGACTGACAATGGGTTCTTG  
 GCCTGGGGTGGTGGATTTCAATTCAAAATTCAAACCAGCTCGAGATCAAGAAGGCTCAGCTGT  
 GAACTTTGTTCCAAATGTGTAAATTACGGGTGAAAAAGTTCATTTTACTAGTATGTTAACCTTGG  
 TTTCTGTGACAAAGTGTGTGTCGATGTGTAGTTACTATAACAAGCACAAAGTGCTCACAAATTGCAC  
 AGTTCACAACGCAAAATGACAACAAAGCCAAAGTGTCAATTTTTAAATTGTTCTGTGCAATTATG  
 AATTTGTTGTCTCAAACCTGCATTTCAGACAGCTGAGCAGCTGGTAATTTTGAAGTATTTTATTAT  
 ACTAAATGTGGTTTGATAACTACTACTAGTACTGGACATTCCATTTTCATGCCACTTGCATCGGGC  
 ATACGTATGCCACAACATCACCCAACATTGATTTTCTATGGACAATTTTTTTTCATAGTGCCTGCA  
 ATGTAGCGGTTTCTCTCATTTCTGTAGCAAGATTAGAATAGGGTAGTATGGATTTAAATTTGCTCA  
 GAAAGCGTGCACAATTGCATTTGAAAGAATTGTAAAATATAATTCTGTAGTGATTGGTTGTATGT  
 CTTCTGCAAGACTTGACTTTGACAAAATATCTTGTTTCAGTAGCTATTTTATGTCAGAATTGTTGTT  
 AACCATCACACTTTCTTTCAGTTGGAATTATTTATTACAGGTATGAGTTAATACTGAGGAAAATAT  
 ATTTATGTGAGGTACTGATACATATATCTTCATTATGTATTTGACATAGTGTGACTATGAAATGTTTT  
 TATGCCAAAAAATCTCTTCAGGACTTATGTAAACGTTATGAATTGAGAATGTTTGCTAAATGTGA  
 AATTATATAGAAAATTGGCAAGATTATTGACGATTTTCATGATTGCTTTTATAATTTTCATGAATGAAG  
 TAAATGACATTCAATCAAGCAAATATGTACTGTACCTGTCGATTTAGTTTGACATTTTTTGATGTTT  
 GGAAATGGTGATTTTCATGCTTGAAATATATTTGTATTACTATTATCAAGTAAATTCTGAAATGTAAT  
 AGAAGTACAAATCATATAATTTATTTACTTTATGTCCTGCTTGACAGTATTCAATGATTAGAAAGTG  
 AGTTTTATTCTCATGCATAGTGAAATGTTATGGTTTTTAACAGTTGTATTACACATGGTGGAAAAA  
 TGGCATTTCAGAAAATATAAACGGGTGGAAAAATTATAGAAAATGATACTTTTTATGAATATACAAA  
 AATAATAGCGAAGTATTTGATACTCCGAAAACCAGAATATTTTTAAATAATGTGATGTCGTGTTCT  
 GTTCCACCAACTAATGTTTTATACAGCAATATGCTACATGTATATTACGATACACATTACTGTGAAA  
 ACATTTCCAAGAAATAGTGTGATGTGATATTTTATACCCACAAGTTGTGGAGAATTCAGAA

# **>krl-like1**

GTAACACAAGTGATGACTTCAAACCATCATCCCTCCCCTACTACCCGTCGTCACCATCATGCTCTC  
 CCAGTGCATCTTCATCCCTTCTTGACAGAAAGTCCAGCCAGTGAATCGCTGGAACGACCAACTGA  
 GCGACGACGAATTGCAGACGACAATGATTTTCGTGAATGTGCCTGAAAAGGCGTCGCTCGAACA  
 CGAACTACCACATGACAGCCTCTACTGTCCAAAACGATTGCTGTGGCTACAAATTGTGCTTCAC  
 ACATGCGTACTCACACAGGAGTTCGTCCCTACAAGTGTTTCATCGTGCCCGAAAGACTTCGCCCCG

ACGGAGTTCGCTACGCGTACACTTACGCACACATACAGGGGAGCGACCGTATCTCTGCAAAGAA  
TGCAATAGTCGGTTTGGGGACTTGTCGACGCTGACCAAACATCGTCGTACGCACACCG

**>z246-like2**

ACTCATTTTCATTATTGTAAGCTTTAGTATACAACCTTGTCACACGGCAATATAGGAGAAATATATACT  
TTATATACTTGTACTTTAACATCAGATATGGTACAGTCATTGTCATTTACCATGTCTTGTAACAACCT  
TTCACGTATATTTAACATGGCTGGATATTAAGGAAATTATTTTATTCTCGCTTTCTGTTATTACATC  
GTTAATCGTTAATTCTCTGCCAGCTTATTTTGTCAATTTTACATTATACACAACAAATATACTTCAAC  
AATAGTTACAAAATAGCATCATTATGCAACATAACTTCGAAACTATTCTTACGGTGTAGGAAAAAA  
TGGATAGAAATGAATGAACTCTGTTTACACTTGAACCTTCGTGCCAATTTGATTATAATGATTATAAT  
GATTACACATGTATATTTTCGATAACGTCATTGTTTCAAGTACGCTGCTACTATACTTGGGTAAAC  
ATACCTGAGCATAAGTTTAAAAAATCGTATAAAGAAATACAAGAATTGTTTTCCCATTTGT  
ACAATACTTTGTACAACCTCATATTTACAGTCGTCTATATGGTGCGAATGACACATTATTTCAACAA  
TGATACGATATCTTAACTTTCTCAAATGTCTCCAGTTGAGAAAACTACGACGGTCAAGAGATA  
AGATTCCTTAAGCGCGTATTTTCGCGGACAAAACATTTGTATCTTCAATTTATCACAAGAAAGTCA  
CCAACATTATTCAAGCGTACATTACGTTGTTTAAATGAATTGTCTTAATATAGCAATGACAGTGTCA  
AGATCGTAAGACTGGTCTCACAGGTACAATTTCAATAAACGTGGTATCACTGTCAAATCAAATATA  
CCATGGGGTATGACAACAGGGTTATTTAAATATCTCACTTCCACATTCGTGAAGAAAAGGTAATAT  
TCAATCAAATTCAAATTAACGTAATGCCATCTCAAGTGATACACTTTGAATTCATAGAAATCAA  
AACTAATAACAATTCAATCTTGACATTGGGCTGGTCAAAAGAAATAACGCGTGATATGTTGATG  
TATTCTGCTTTATATGTCCAGATATGTGGTGGTTATTCCATCTTCGGCCACTTTGCGTTTGGGGTAG  
AAGAATGTGAATGCATTTCTGTTCTTGTTCGTACGTGAGTATGTGGTTGTCTTTCACTCTGAATCCG  
CGATTGACTGCCGAGTCTGTTATTCGCTCTCGTAACACTCGCTTGTATTTCTCAAAGTTGATGTTG  
TTGTTCTTTTGTGTTGCCCCCTTGCAACTGAATTTGTCTTTGGAGCCAACGCCATACCAAGTCTTA  
CTGCACAGTGCTACAATACCATGACCTTCCCATTCTAGTTTGAATAGACCCGGTGTTCGTTTATCAT  
ACCGTCTGTGCTCCTCCGTGTCAGTACGGGGCAGCCAGTGATGTTTCTCGTCTCAAACCGTTCT  
CGAAGCTCGGGTCTGACCAGACTTTCAATACTCGCACCAGATAAGGCCAAAATATGCCGAATCGG  
TGTCATTTGAACGTATTCAAATCAGATCTGTCTAAGAAGACATCGAGAAAGTCAAAGTAGAAT  
TGTAGCATTCTCAGCTTTGCATATTGGTAGACGAAAAAGCCAATCTGAATTGGCAAGTCGTGTGC  
TATTTTGTCTTGGACATTTCAACTTCGTAACAGTCGTCAAGTAAAGTGTTCAGGTCACGGAACA  
AAATCTCATTGATAAGGCGACTAGCTTTGGAAGAATCCGTGATTTGATTATTTGAAATCTGGTCT  
TGTTGGTGATAGTTTTCCCGTAGGAGGAATCCCCATCAGCTTCATGGTATCTGCTATAACAGACT  
TTGAAGGGTCTGCTATCTCCAGCTCTACGCGCGTCAGAAACAGCGTCGGCAAATTCAGCGAAGCA  
TCGAATCGGTTTGTATTCTACTACTTGGTACACGCGAGTGATCACTAAACCGTGTTCAGGTACCA  
TTTTGCAAGTGGTGTGGCGAGAAAAATTTTCTACCGTACATGCTGCCTATCAAATCTTCTG  
GGGTGTTTCATGATATTATGCTCTCCCCGTAAGTTTTCATGTATGACCAATATCATCCGAGAAAT  
ACTGGTGTGTTTTGAATATGGGCGGCATTTCCGCAAAGTATGGTTAAGATGATCAGGAACATGAA

TATCGCATTCGATACATCCAAAGAGATTGCCTGCTAGTATTTTCATGTATGATTTTCGTCTACTGATAG  
 TTTTCGATTTGGAATCGAGTGGTTTCTCTCTCTCCTGAAGAAATTGCCTGAGTTGGGGATCGCTTT  
 TTTTCATACCATCGAATTGGCATTCCCACATTTTCGATGAATTCATACCCAATGCTTCGAGATACTT  
 TTTCTTCTCCAGAGTTCTCGCATACCTTTGCCGCATCTCATCTTCAGCATGACGAGGGTTCTTTTC  
 GCAAGCATGGCCATGAAAGTAGCAGCCTTGAAATTCGAAGGCTGTTTTGTCTCCGAGCACCAG  
 CCATCGACTGGTAACATACGCGGACCTAAGCGCTTCTCCGAATCGTTGCCTTCGTGCCTTATCTTT  
 ATTCCACGTTTCTGCGCCTCCCAATCGAGCCAGTCTTGAGCCTTTATCGAAAAGGGTTTTCTTTC  
 TTTTTTGAAGGAGGTTTCTCCTTTTCTTCGTGTTGGATAGCCGGTGGGCATATCTTGCTCAGAG  
 CCCAGAGATACAAGGCATTTGCATCATAACCCTGAATCTTTTCACAAAGTTTACCACCTCGTATAC  
 GCGTTTCACCCGCTTCGTGATATCGCGTAAACACGATAGAGGGACCGCCACAAGATTTAGTCG  
 GAAAGTCTTGACAGATCTTGATCTTGATTGCCAAATAGGGCAAAGTTGGCAGATGGACTGATG  
 TCAAAGAGATATTTCAACGTTAGGCCAGGAACAGAAATACCATCCTTGACAGATCGATATTTCTT  
 TTGCGATATGTTTCCGCCATTTTTTCAATAGCTTCCACAAACGGTTTCACGTCTAAGTTATTATACC  
 ACACCAGATAGTCTCTCATCGTTGACATTCCTTCCCGCTGCCAAACATCTTGACAATGGGCGTAG  
 TCTTCATCGGTGAGAGAGGTACCTCTGAGAGAACTGTCGAAAGCCTCTCTGGGTGGAAGAGAC  
 GGATGGTCAAGTTTATTGAAATGCATCCATTTCGTAGGGAAATATGCCCTTGTCATGGAGCAGTC  
 ATAGGCACGGAGAACTGATCGTAAGAGAAACCGGGAGCTAGAAAGTTGGTAATGTCTAAAAA  
 GCGCAAATGCTCGGTGTCAATGGACATGTAATTGTTATTTCTTTTGACCAGATGTTTGATTGGTTC  
 ATTTTCAACCAGATATGGGAGCAAATATCTCTTACCAAGTTGATGTCATAACTTCCACTATTGAAT  
 CCAAAAACAGGTATTTGTTTCAAATGACTGGTAAGAGAACATAGCAGATTTTGTAAGTAGGATTT  
 TTGTTTTTTGTTTTCGTCATCTTCCCCTAACTTCTGAATCTTTTCCCTTAACTCGCTGATTACTCCAT  
 CAAATTGAACGGTCAAGGTTTTATACTTTCTTGCTAATTTTCGATGAGATATCGAACCATATCCC  
 CCACTATTTCTCCTGGTTCCCCTCCACTAACAAAACAAACGGCTTCTTGATAACTCGGTACGTTGC  
 TGCATACGCTAACACTTAGTGGTATGTGTTACGAGTCCACGTCAATTTATACCGCCTGATTTCT  
 CCGTTGTCATTTCCGAGTACGACTCGAAGTCAAAAACAGCAAATGGGGAAAATAATCCCACTC  
 GTTCGGAATCTCAATGCCTTCTCTCGTATCTTGTCAAACACGGATTGTGAATTCACGAAGACTCC  
 TCCAGGATACACATCGGTTGTGCCTTTGCACTCGCAGGAAGCTTCATGACGATGTAAGTCTTTG  
 CTGTCTTCCACAGCTTTTGACACTTCCGGCACAAAAACGAGTGATTATACCTGTGATGTTTCTAA  
 TGAGCTGAAATGGTCTTCGTACAGGTTTACGTACAGAGTAGTCGCGTGTCTCGAAACTTCGA  
 CGAACGAGTCTTGCTACTATTTCTCCTCCATTTCTCTCCTCCGATTCCGGCTGTGTCGGCATCCCCG  
 GCTTCCTCGCTTTTTTCCATCTCGTTCTACAAGTTTCGTAAACCATGATGTTGATCTTAAACAGATCCT  
 CGATGTGATGAAGTTCACTCAGTTTAACTCCTTCGAAGTTGCTGCGAGATCGGGTTGTGTACTTT  
 TCGAACAGATTCAACGTAGCATTTTCGAGCGCCATTCGATGATGACCTTGGTGAAGGGCTATGC  
 AGCGAAATAAGCACAAATTGTCGGTGTAAGTTTTTGAAGTATTGGGGTTTTTCATGAGCGAAAC  
 GATGTTTTTGTCTTAGTACATAAGGTGGGAGGAAGGAACAGGTTCCGATGGGATGGTCTCGG  
 AGCTTGATACAAAAAATGTCACGTTGCTAACAGCATCCACGATCCATTTGGAGTTGGGACGTTG

TAGCTTAGCGTATTCCAATGGATCCAGCTCTTTCAAGGCTCTGAGAAAGGATTGGAACGTAGCAC  
GATCCTTTATAAAAAATGGGGTTTCATAAAGTCTCGTGTTCCCAGATGAGT

**>eve**

GGTTGACATTTTCAGTTTATTGAGAAATTCAAATACACATTCATTAATATTAGTGAACAACATGAAA  
TAAATAATAAAAACTCAGTCAATAATTACAACGGTTCTAAATAAGATCTCATATCACTATAAGAA  
ATGTGTGCTTAACAGACTCGAATCAAATTACGGTTTGCTAACCATCCGTTTCACTATATCCGGCAA  
GACTAAATAACATTAATTGGTTAACGGTATTTTAGGGGTAATCTTGTAGTTGCATTAATTCGTCATC  
GACATTTAGGAGTTGTAACAACATGATCGGAAATGTAAATACAAATGTAAATACTCGTCATTGTGC  
ATCAACTTAATTCATTACACTGTAACATCGTCATTACAATATTTATCAATTAAATATCAAATACTGTTT  
TTTATGATACAAAACAGCTCGTCAGTTTCACTTTTTTTTTCACATGAACGTTTTAAATTGGACTTAA  
GTAACACGCAAATATGACACATTGAAAATTTACAAGTAAATTACGATCATGAGTTTAGTGTAAC  
GGGCAAGATGCCAGTGATTTTTCTGTCCACAAAGTTCTTTATTGAGATTCCTTTTCAAATTTACTC  
AAAGGCAAGTCAAAGCAGTTTTTTCTTTCTGTTTACACAAAGAATGTCCAGTAACGAAGATTCTT  
GACTTAAAGTTTCTGGAATCGGCATTGGCATGTGATGGGCGGCCGGGTGATTATGCGTCGCG  
GACAGTACGGCAGGGACGTGTACGATCGCCGGGTGTTCCGGCGCGCTGCAGCTCACGGGTACC  
GACGAAGACGTGACGGGTGTGGTAGCCGTTGTGCGGACCGTACTGCCGGGAGACGAATGCCG  
GTGGGGAGAGGAGCCGTGGGCGTGTTGAGGTGATGGCAAGAGCACGGCGACTGTGTGGCT  
GGTGGTGGCGGTGGGGGTGGTATATTCGATGGCAGAATCAACGATGCTCCTGTTCTGGCCGCC  
GAGCTCATCAACAGATCTGCTGTTGGGTGTGCGGCAGCCGCGGCACCGGTCGGAAACGGTCTG  
GCGTAAGGGTGCGTCAGTCCATGAAGAAGATCGGCACGGGAACGAAGGTGTAGCGAGTAGGC  
GTCGGTGGGTACAGGGGCGGCTCCGGCTAAGGGGTGGTAGTACGTCAGCGGCGAAGGGGCG  
TGGCAGGTGTAGGGAGGTAGGCGACCGGCGAGCATCAGCGAGTAGAGGTGGTGATCGAAGTG  
GGCGTGGTGGGGCCAGGAACAGGCGGACATAGACATTGTTGGCGCTTGTCTTCATGCGGCG  
ATTCTGGAACACACCTTGATGGTTGTTTCTGGAAGATTACGGGCCGTGGCAAGTTCGCATCGT  
TTGGGGCGAGACACGTAGTTTTCGCGGGCAAACCTCTTCTCCAGACGACCGATCTGCTCTCGGG  
TGAACGCGGTGCGGTAGCGGCGAACTTGCAGCGGGTCGAGGGGGTCACCTCGTAGTGCCGAA  
CTTGAAGGAGAACTGGATCCTTCCCAAGTCCGCTGCCAAAGTCGCTGGCATCTTCTGGACAGC  
TATCAGGCGATAGACGGTCGTCCCACTTAGCCTTGGGGCTGGTGTCCCGGAATAGTCGTGAGC  
GTCCCGCACGCTTTCGTGCAGTTCGTGCTGCTCAAATGTTGACTTTCATCGGCGGTGTGCGC  
GAGCGGGAAAGTGAATCTGACGGGCGTGGTAAAATCGAGAGTCTGTGGTGTGCTGTGCGC  
GGCTGGGAAGGAAAGCCCGGTGTGCCAAGAGTTCCAGACGGGGTGGTGACTGGACAGTCCC  
CGGCGAGAGCTCGACTCATGACCACGGCGGCCGCGGAAGATGTCTTGGGATTACTGTTGCTAG  
TCACGCCAGCGTACGGCATGAAGAGTGTGTGATGCCGTACCTCGGAGGGAGGGATCGCTGGGC  
TACCGACATTGCTCCTGCTGGACTGATATTGTTGTTGGAGTCCTGTTGTTGAGTGTGATTTCG  
TTGGTAACATGGTGAAACCTCTTCCATGTTATGGACAGACCAGACGTTTTTACTTGTTGGCTT  
ACACCAACTTTCTTCTTTAGATCGTCTCAAATCTAATCAAGTAACGAGTGTGCTGTGCAATATTTT

ACCATGTGACCGTTGGGATGCAAAATGTCGGTGTCTTTGGAAGTTATCTCTCGCAGAACTGA  
 AGATAAAATTACTTGGAGATTAAAGAAAGTGCCCTCTCACAACGAGATGAGAAGATGATGTT  
 GTTAAAACAATTCTAGAAAGTGTGCTCTTTCTAGTTCGGTCACACTATTTACGTGGTGATAATCA  
 ACGCCAGTCAGCCAACTTGCAAAATCAGTAGAACTTTATGATGTAGACCAGTCCACTTTTGAAG  
 AGGTAATCATCTGTAAGCGCAACACGAGAAGTGGAATATATTGGAGTTATCACTGCGAAGAAAA  
 TCACCAT

**>z185**

GGCCACTAGAATGATTCCATGGGAGACAAATGCATTTAAGAACCTGTCTATAGCAGCCACCTGTT  
 TATAAAGGCCACATTTTTGTTCCCTTGGGTGGTCACGATAGTTCTATGGCATGTGACATGGAGA  
 ATCAATCTTTACACAAATTTAGAAACAAGATAAGTTGATTTTAAATTCTCCAGTGTGAGGGCAA  
 AATATGCCAACAAATTATTTCCAAGAGAGTAACCTTATTTGTGGCAGTGCCTGAACACAGTTGA  
 TAATCTACAAGCCACCTAACTTCCGACAACCTGAACATAATACTGGCATGTTGTTTATGGACCT  
 GCCATACTTTTTGTGTGAAATATCTTACATAACTTTTGTCTTACATTTTTCTCATTACATGCAATACC  
 CTGAAACTATCCATGTATTATCCATTAATAAAATGGGCTCAATATATTTTTCTTTCTTTTATCATCTG  
 CAGGGTCCCAGATTTTCATGGAACTAAATTCTCTGATTTTTATCTGGTTTTCTTAATGAAAGT  
 TAAAAATTCAATGATCATTATTTGATCTACTTCTTGCTTGCCTGTTCTTTTTTCTTGCCTCATAT  
 TCATGGTACAAACATAAGGAGAGAAAAGTTGGACCAATGGATAAACAAAATTTCCCTGAGTTGA  
 GGGAATTATGTCTCAACTTTTCCCTGACGGGAAACGGGGAAGTAATTATCCAGGTTTTCCCCC  
 GATTCCAAGTTGACAGGGAGCTCTGTGTCCAACATTAAGGAGCTGAATATGAACTACACTGTG  
 TTGGTTGGGCAATACTCCCTTAGTCACCAAAAACTATTGCCTAATGTAATGGTCAATAGTCTCTGA  
 ATGGTCTGCATATTTACAGACTGCCGCACCAAACTTCAGACGTCTTTTTTTTTCTGGAGACTTC  
 CAGCATCTGCAAACTGATCCTCATTCTTGGGCCAATTCTCCATCATCAACGGCAGCTGCATTTTCC  
 TCTGGCGCAGGAGTCACCTGCTCCTCCTCCTGACGACCAGCATCATTGGTTCTCCATCACT  
 CTGCTCCACCGATTCTGCGCCATCACCATGGAAACGGTCTCGGTTGTGTCTGTACCTCACCAG  
 CACTCGTAGTGACTATTGCGATCTGCTCCTCTTGAAGTGTCCATGGTTTCTGATGTGGCGACAATCA  
 TGCCGTTCTCGGTTGCCAACGCACCGTTTCCGGCAGCCAGAGCAATCTGATGAGCCTCTCCGA  
 TGTGATGGCCGTGACGGAGCCATCTGGCTGGGTGCGGAGATTGACGACGACGATGCTGGTTTC  
 ACCGTTTTCTGTTCTGCAGAGTGGCCTGCATGTTGAAACACCATCTTACCAGCAGGATGTAAA  
 ATGACCTGAGCGTTCTCCGCAGCCAGCTGCTGCAGCACGAGGGCGGCCTGCTCGCTGGTGGCG  
 CCTCCATGGTGATCTGTGTGCTGTTGACTCCCTGTTGGAGCAGGGCCTCGGCTTGTCTGCTGG  
 CGGCCTGCAGCAGAATCTGGGTGGCTTCTGGGAGAGTGCCCTCAGAGCTGTTGGGCATGCCTG  
 AAGCGGCCTGCACCTGGGCGACGGCTTCTGCATAGCGGCTGAGGCAGAGTTTGTGGCGAATG  
 TGGTGCCATCGGCAAACTGTAGCAACTGCGTGCCCTGAATTTACCCGACATAGCCTGCTGGGC  
 AGCCTGTTGTACAATGTCGTTTGTAGATGTTACTGGGACGACCACACCAGCGCCATCTACTGTCA  
 CCTCAACAGGAATATTTTGCATGTTTTCCAAGGCCACCAAGTGCCTCGGCAGTCATATCCCCCTCC  
 GCCAGGGTGGGGTCTGGTTCAATGACCACCACAACATTCTGACCTGTATTTTACCGGCTTCTC

CATTGGCCATGGTACTTTGATGGTAACAGTCTCCTCTATAGGGGGCGCCATCTCAATCTGTTCTCC  
 CCGCAGGACGTGCCGTTCTCGTGACCCTTCAAGTAGTCGCTGCGAGTGAAGCAGTTACTGCAG  
 TACCGACATCTGTACAGCTTGGCACCAGTATGAAATATCAAATGCCTCTTGTAAATCGATGACGGCC  
 ACAAAGCGCTTGTTGCAGCCAGGCTTGGGACAGATGTACGGGGCTTCGTTGCGGTGCCTCCTC  
 TCGTGATAGGAGCGCGAACTACGCCGACTGAAGGTCGCCGTACAGAAACGACACTGGAGCTTC  
 TCCTTGCCAGCATCAGTGTGGGCTTCCAATTTGTGATCCTTCAGTTCTGGCCTCGTCTTGAAGGC  
 TCGGCCACACTCATCGCAGAGTTCATTCTTCTCAGTGCTGTGCGTCTTAAGATGCTCACGAAGCT  
 TGCCGATCTTACCCACGTCTTGCCACAAATCTCGCAGGCAAATGGTTTTTCCAAGGTGTGCCTA  
 AGGGCATAGTGATAGTTTAGAGAGGGCCACCGATGTGTAGGCTTTGCTGCAAGTTTCCACCGGAC  
 ACTTGTAGATGTGGCAGGGATCCAAGCCATGAAAGTTCTCCAGGTGGGAAGCTCTCTCCTCTTT  
 CGTCTCAAATGTGTCTAGACAGTCATCGGCAGTACACTGGTAGCGGCTCTTTCCCTCGTGTGCCC  
 GAATGGTGTGATTCTCCAGACCCTGTTCCATGGTGAATGTCTTCTCACAAAACCTTGCACTTCACCT  
 GGACTGGACCTTTTGGTGGAGGTTCTGCATTATTGGCTTTTCTAACATGCCTCTCAAGATGAATG  
 GGCGATCTGAAAGCTCTCTTGCAAACATCACAAACGGAATTTCTCCGACATGGTCTGCTCACGTTT  
 GGATAAATCCGGATGTGCAGTGTCAAGTGATTGTTGTACGTCATCAAGAACCGGAAAGCCTCG  
 TCGCACAGATTGCATATAAGATATTGCAGTTTGGGGTTCTCATGCTGCTCCCTGTGCAGATCAAAC  
 CAAGTTTGC GTTGGGAAGATGTTATTACAGGTTTACAGGTGAATGGATACTTTTCCGGATCTTC  
 GGGGGTGGGCTTACACTCTGGGGGCGGGGGCAAGGCTTGGCGTGCCAACCTTGCCGGGAAAT  
 CTTATCCTCGTTGTAGCGCCGCTTTTTCTGCTGCGGCCACGCTTCTTCCGTGGTATCGGTGGA  
 CGTCCATCCTTGCGCGGCCGTCCCCGGGGTCTTTCACGCCAGTCGGCCACGCAGGGGTGGCT  
 GTCCTTCGGGAACAGGAGCAAGCTGTTCTTGTCCCTCTTCCCCATGATCATATGCTCTCCATCT  
 GCTTGTTCAATCACCATATCTTCGGTTAACACCGGTATACCGGGGTCCTCCCCCTCCCCACCAATC  
 TGCCAGTTATCCGCATCCATGGACTCTTCAGTTTGCACCTCGGCTAATTCTCTTTCTTCTTCTCCT  
 CGTCATCACTGTCATCTAGTCTCTCTCCTGCCACACTCTTGACAATACCACACGACTGTCTGTGCT  
 GCATAAACAGGACCGAGGACAAGAACTTCTGTCCGCACACAACGCACTTCCTGCTTCGGCCTG  
 GAGTAAACCCAGTGTCTCCTAATTCCTTTGCCAGTTGCTCCCTCTTGGCCATTTCTTCTTGATGCT  
 TTTTCTTCTTTCCGCTCTGCTTCTGCTAGCTGCTCTGGGGTGAGCTTAATCTTCTGCGGGCGTC  
 CTCTTCTCCTCTATTTGGATCTGGCGGGGGTGGGGGAGGAGCCTCCTCCTCTCAATCCCAGA  
 ATACCATGTTCCATGCCCTTTGATACATCCTTTGTACCTCAAAGTAGAAGACTTTCCCTGTTGC  
 ACGAGCATAAGCGTCTGCTCCTCTTTGTTTGTGGTGGTCTTGACAAACCGCAACCATCCGGGTAT  
 GGAGAAATCATTGCTGTCCAGTTGGTAGCATGTCGCACCGTCATCTGAAAATATCTTCCATGATCC  
 CATATCCACCTCCTCAGATGGGTCAATGTTGACACCCTGGCCTTGAATGGTCCATAGCGGTGAC  
 CTTCACTGAGGGCCTGCTTAGCATAAACCTTCACACTTGCTTCTTCAGATGACGCCATCTTCGTAA  
 TGTAAATGACCCAGAA

>krl-like2

GCAGACGACATCGCGTCACTTGCCAGTTGTGAACTGGTTGACGTCGCCTCCATCGGTACTACCA  
 GCTAAGCGACGACGAATTGCAATGGGCAATGATATCGTGAATGTGCCTGACAAGACGTCCCCCG  
 AACCCAACTACCACACAATTGCCTCTACTGTCCAAAGCGATTGCTGTGCTACCAATTGTGCCT  
 GTCACATGCGGACACACACCGGAGTTCGTCGCCACAAGTGTCCATTCTGCCCCGAAAGACTTCGC  
 CCATCGGAGATCGTTACGCAGGCACTTACGCACACATACAGGGGAGCGCCCGTATTTCTGCGAA  
 GAATGCAACAGTCGGTTTGGAGACTTGTGACGCTGATCAAACATCGTCGTACGCACACCG

# **>hesA**

ATGATATACAAACATATCGCCTCGAGTCAACGAAACGCAACAATTACATAATACTATGAATCCGTG  
 AAAATGCATACAAAACAGTATAAAAACAGTTCATACATCAGTATCTAAACAAGTTACTTTCAAAA  
 AACAACTACGGTATAAAATGATTTGGTCAGTAGCTGTACTGGGATGAAAATATGTTAAATATCACA  
 GTATGAACACATCAACTTGCATATTTTTTTGTTTACATAAAAGGCACTTGTTCTTACAAGATGAAG  
 TTAAGTTCAACACGAAATTTAGTAGCAATACAAAATCATCACTGCAACCACACACGTTATACCGT  
 GTAAGTTGTAAGTTTAGAAAACCGCTGTTAACTTTTTGACATTTGTGCTTGTCAAATGCCAACTT  
 TACATGCATGCATCACACACAGCAAAGACTTTAACAAACGAGGCAAACACGGAATACTCTGTTG  
 TCCATTTTTTGCCCCAAAACACGAAGGAATGTCAAACAATTTTACATGCAAGCCATTGACGTC  
 ATAAATACACGAACTAGTCTTGTTCAAAGTACGACACACACTATGTCAAGGCACCTGATGAAGT  
 CTAATCAAAACATGATTAACATTATTGTATGTGGTTGTTTTGGAGGGCGGAATGTACAATCTTTG  
 GTCCATATTATCAGCCAACATATTACATAGATCATGAAGAGCAATAAAACGAATGTCTTGCGGACA  
 TATAGTCAAGCTTACTTTTGCAAAAATAGTACTTGAAGGTTTGATATAAATAAATGGAATACAACT  
 GTTCTGAATACAAAGGATTGACAGGTAGATGTTACATGACGAAAAACAAGTCCATCCGTCTTAA  
 TTGTCTTTGAAATGTTGGAGGTTAACTTCCCGCCATTTTCAGAGTTATTCGTGGTGGCTCCATGG  
 TCGCCAGACGGGCTCTTGTCTACAGGCACTTGACGCGGCTTGACGGGTTGGAGTACCGTTTTG  
 GGCGGGCTCACGGGTTACAGGGACAGTTTGATACGCGATCTTCGTGTGTCGCATGACGGGCGTC  
 ACCGTCTGCATATTGGGTGCTGGGACTGTGACTACGGTGGGTGCTTGACGGTTGCGATAGAAG  
 GGGAGATTTGCTGCGGCGATACCGTCTGCGGCTGTGCTACTGCGGACGGAAAATGCACCTGAG  
 CGTACGCTTTGGGCGATTGCGCCGAACTGGTCCTTGAGAAGCCGATGATAGTGTGTTGGTGAGG  
 ACAAACGGGTGCACTCTGGGCGTAGACGGGAATAAAATGACTCGGCAGCTGACCGCCAGGA  
 AGAGCTTGAGGTGGCAGGACAAGAGTGATCTCGCCTGTGGGTAACGTTCCCGGAATTCCGAGC  
 GGGATTCCCGACACTACTTTCGTGGGCGTAGCAACATTGTTTGTGATATGGCTGACGGGTTCCA  
 CTTTGGTTTGCATGTATTGTTGCACCGTTGACGGGCTGACGTTGGAGGTCGTCGTAGCTGCCGC  
 CGACGAAGTCGCCGCTGGAGAAATCTGTACCCTGATTGGCTGCGAAATGGATGACGTAGTAGTG  
 ACGGCCGCTGACGCAATCGCGGGTGGGGCGTGGAGACTGGATTAGAGTAGCTACCGTCGTC  
 GTTGAAGTTGATGAATTGCTGCGATCGGGTGAACAGAGACCGGTGTTGTAGGTGGCGATGGTT  
 GCGTCGTGGTGGTAGGGTTTGAAGGTGGGTTGCAGCAATTGGCTAGATGATTATAAGTTGCAT  
 ACGCATGTCCGTGCTAGCCACACTTTCGACGTTGGTAAAGAAGCGGGCGACCTCGTGAATACAT  
 TCACTGTAACCTTGACGGAAGCGACTGGGGTCGGTCGATAGAGGACCTGATAGATGATTTCTCT

GAAGGGTCCTGAGATGTTTGACCGTCATTTCAAGGATGTCAGCTTTCTCCAACTTCGAATGACG  
 AGAGCTATCTTTATTTGTAGCTTCTAATAAGAGACTTCAGTTGACCAAGGCTTTGTTGATTG  
 TGCTCGTCTTCTTTTTTCCATGAGTGGCTTGGACGACTTTCGTCCTTCGTGTATCTTTGGTTAGT  
 GTCCACAGGCATCTTGGTGTGGTATACTTCACAGTTAGGCATCCAGAATTGGTATAAATCACAAA  
 GTTATGGAAGAGCGAAACAACTTTTTACACAAGTCAACAGCAGACGACTACTGCAGAAGAGG  
 CAGGCACAGGTAAAGCGATCAAACACAGAGTACGGAGCGTGTGCGTGGATACCGCTGAAGTGC  
 GCAACAGTTTGATCAATACTGAAGGAATGTTTCAGGGGTCGTGCGGAGATAAGTAACTTCTTGC  
 CCTCTCGAGTCGCGGACCTGTCGTGTGAATCGCAATTTTCAGGATTTTCCACAGCCGACTAACAC  
 GGTCTACAAAGCTTTGAATTGACATTCCTGGACATAACAATTGGTTGACATGCCTCGTGATTAC  
 CAAGTCTCGCGACCCAAAGTCACTCGCAGTGCTCGGAATCGCGCTCGCTGATTGGCTTACGGGC  
 AGCAATGCCGTCCGCAGTTATTGGACAGTCGCGTGCGTGACGTAAGGCCATCGCCGT

# **>soxC**

GAGAAATCTTGCGGAGAGAAGTTGAATGATTCATCGCTCGTTACACAGTCAAATAAGCCAC  
 GCGGGTTATGTTGTGTGCTACGTATCATTTGACTACGGTTCGATTTACCTGGCAGATTTAACT  
 TCAAATCTTCATCTCCCTCTGTGGATTATTTATACCTGTTCAACGTTATTTTCTTTTGATGAACTG  
 TTTTATTCACCATGGTTCCTCAAACCCTTACGAACGGCCTGATCATGCAGCAATCGCAGGGTCCC  
 AATCCCCCACGGACAGCCTGCACAGCAATCCGGACGATCTGAAGCGGTCAACGCTGGACATA  
 GCTGAGGACATTTGCCAAACCACTGGCGAGGTAACAATGGACACATAAAGCGGCCCATGAAC  
 GCCTTCATGGTGTGGTCGCAGATCGAGAGGAGAAAAATCATGGAGACGCAACCCGATATGCATA  
 ACGCCGAGATCTCGAAGCGGCTGGGTGCGCGGTGGAAGACGCTGGACGATGTGCAGAAAGCC  
 CCGTTTGTGGAGGAGGCGGAGAGGTTGCGACTCCTACATATGGCCGAGTACCCCGACTACAAG  
 TACAGGCCACGAAAGAAGTCCAAGCCCGGACTAAAGCTGAGCAGGCGACGAAAAGTAGCAA  
 CGGCGGGTCCAAGGCGAAAACTAATCGACCCAAAACGGCATCGTCTGCACCGAAGGTGGCCAA  
 ACCGACCAGCCAGCATCATCACACGTCCAGTCCGGGCGCGTGGAGAAAAATCCCTAAGCTGAA  
 ACTCACCATTGACAAGAAGTTTCGAGATAGCATCAAAGCGAGTAAGATTGTGGAGCTAGCACCC  
 AGTCAACTGACGCCACCCGCTAAGGTTCCGGCCAGCCCGACGGGCTCCAGCACGGACCCAGC  
 CCGGAGCAGAGCCTGTATGAGGATTACTCCGTCCCGCAGCCCTACGACATCAAACAGTGTGATT  
 ACGGCGTGCCGTGTGGGGCCACAACAACGACATGTTTCGAGTCTGCCTCCTCGGACATTTCTCA  
 ACAATCGTCCATGTCTACCAACTCGTCGACGTCAGCGATGTGACAGCGTCGTCGTATGCACCCA  
 GCACCACGACATCACTTGAGGACTTTGTGTTCCCGGTGGCCTACCGGTTTAGAGTTCAGTAA  
 TTTACATTCGGGTCATTACCAGACGACCTGAGCCCCCTCGATTCTGTGTGGCAGCAACGGCAGT  
 CATTTGCAATTCCTCGATTACACGACACCCGAGGTAAGCGAACTCATAGATTGGGACTGGCTTAG  
 CCTGGCCTCGATGGTTTCGGCATATTCGAATTAAATTTTGAACATGAACTACAGACTGAAAACA  
 AAAACAATCCTGCCGAAAAGTGACATTTTACAACTTTTCAGAAATCAGGTTGATCGCTTCCCAT  
 TCCAATTTTACTCGAACATCGGCTGCAGGTTGGCAGACGTTTCGATAAAAACCAATTCATACAGAG  
 TCGGAACTGTATTTCTGTGTAAAATGTACTGTGACTTTGCAAATGGCCTTATACAAAATAAGCGC

AAACTGGGTTTCAGAAATAAACCCCTAATACCTGTCTTGATTGTTATATGCATCGCACGCCAACATC  
 GTTACCGAGTGACTTTTTTCCATTAAATCGTTTTTCATCTATAATTTATCGGGACTCTTCGCTGCCGT  
 TTTGGAGAAACCTTCACGAGAGAACGTGTTCCGAGTTGCCTGTATCCACAGGAGGCCTCATTT  
 CAGGATCCTTGAACCGGCACGCGAATCGAGAACTGAATTTACAACGCATTTCGACCTTGATGACC  
 TCTGCGAACTCTGTGTGTATACCAATGAACAATTCAAATAATCGCGCCAAGGACTTGTCGTCTGCT  
 GTTGTATGTGTATTCAAGCACTGAATTCAGTATGTGCACTGTTTACTTATTGTGAATTCCGAATCA  
 ATTCTCTTTTGTAACTCTGTTATGGGTCTAGATTGTATCCGGACCGATTATTTTCAAGACAATTTGTT  
 TTCTTGTGATGTTATTTTTCTATCGAACTGTAATGTTAAAAAATAACATTTTGAACCACAAATTC  
 TGTCAGCACTTGGAATATTCCGAATTGTTACATTCTTATAGCACGTATTAATATTATATTATTTATGC  
 AAAGATTTTTGTAAATTAATCACTAGTATGTACGTGTGTACTTTGTGAAATGCTATAGTCGTTTCGCA  
 TACTTGTAGAAAAGTGTGTATTGCGATAGCCAGAAGTTTTTATTTTCATGCTGACTGTCTTCATGTT  
 TGTGCAGTTTTCTTTCTTGAACGCTCTCAGAGAAATTGGAAAATTATTTTGCAAAACGAGTATA  
 CAGATTGAGATAAGATTATTACCAGAGAAAGGCTAACTTCACTTTGATTAGAAAACCATATATAT  
 TACACGGGCGGTGTACAGAATTCCACGGTTTTTTTATTCAAATTGAAGGTATTTTGTAAAGAGATTA  
 TTGGAGAGAGATTATTAACGCTTTTGTACATGAGTAGATGTCTATATTATATATTCTTTGTCTATTT  
 TGTAATAGAGATGCTTATCTAACCTATTTCTAAATTGTACTCGAGCTTTTTTTAAACAAAACCTATT  
 TTGTAGCATAAATACAAATACATTACGGAGAAAAAAAATATTTGCTATGGGTTACGTTTAGCATCG  
 CCTGCACGTATGATGTCTCAAAGATTTTAGAGTTGCGATCTTGCTATCACTCGGTCTCGTTTTACC  
 ATTTAACCTCAGTAAATACAAGTTGAAATCGATGCACGAGCTTTTGACCAAGCTGTGTCCGTTAA  
 CTTATTTCCCGACCCCTTTAAGCTTTTAACTGTCTGAACTTGGTATTGTGCATTGAAACAATATTA  
 CTGTGACTACATCGCAGTGAAGTTTGTACATGCTTATTGAACTTGTATAAAATCTTGTGACTTCC  
 AGAGACGAAATTGATCGTCTTGCTTCCAAGCTAAAAAAAAGTTGTACAGAAACGTATAGTTTCT  
 GGAGAAAACAATGTCTGAGGAGTTGAACGTACGAGAAGTACGAGACCATATAAACGTGCTCGT  
 AATTTTATTGTATGTTATTTACTTAAAATGTAATTTTCTAATGATATTTGTAATATATTTTGTAGCAT  
 ACTTCGTTTGATACAGACTTTGTTACTCGTAACTTAAAAAAGTGAGAAAAATACAAAAACAAAAA  
 TATACATTTCCAGAAATGAAATTTTGGCGTGACGTGGAAATTATTTTCTCAACGTCTGTGTTAGA  
 TGAGAGAACCTGTGATATACAGTGTACGCACATCGGAAATGTGGAAGTGAGCTCGTGATATTAC  
 GCGGTGGTGGTGGTGTATCTGTGCTGTCTGCTGATGTTCTGTCAGGGAAGTCTGAGAGAGAG  
 AGCATGGTGTTCATGCACGTGAGATGAGGAACTTGCCATTTTGCCAACAGCATTTTACTGTGTAC  
 TAATATATAGGGTACCACTCACATTTTGGGTAAAACCAAGGCATTTCTGGGGGTGGGGTTACGG  
 GTGTATGAAATAGCTTGTCTTGTGGTAATGTACAGATGATTTTATTTTCAAGACCCTCCCGTGAAGA  
 CTAGGTGGTATGGACTACAGTCTATAGTGTGTTTTCGTGATGATTGCGCGTCTTGTGTAGGAAAT  
 GGTATCGATGTGATCTACGTGGATTTGATGTTTTCGTGTGTAAATTTGGTATGTAGAATATGGTAA  
 AGGCACTGTAATCTATGTGAATTGGATGTTTTCTGTGTGTAAATTTGG

>rxr

ATGGCGTATACGTTGCGCGTGATACAATTCAACTGTCTGCTGGTCGACGAAGCTTTGCACTGAGA  
 TAGGCGAACGATACATTGTTAGTGCGACCCGGTTGGACACCTGTACTGTATTGTCTACAATAAATA  
 CACCCTCCGTAACCTATTGATTATTACAAAAGACCACAACTTGGACTAACCCGGGGCTTCAGTTTG  
 TCCCCACCCTCCCTTTTTCTTTCTCTTTTTGGATGTGACGCTCATATACCGTACAGCTACCCTTCA  
 ATGTCTATACAGTCTCCGAACACTTAATGTGAAGGGCGCATTATTTGCATTATTAAGTCTAATCGTC  
 GGGAATCTCATTAAAACGTCAGCGACTTGTGAGGAGGCAAATCATTGACACCCGGACGGCCA  
 AGCGATCTGGTACTCCACAAGTACATCTTTCGCGCCACTTTTTAACTTTATTTATCGTCTGCCAAAT  
 ACCACTGCGACAAAAAAATGTTATTTTTCTCTTTTCATCATCAATCCGGTAAAAATATATCGTAAA  
 TCAGTTTCATTTTGGATATCGCAGAAAATTATATTGAATTTCTTGCTTGAACGTCTGGTAGTGGAA  
 AACTTCTCCTCATCATACAGTTCTTTCTTGAAATTTCTCTGATTTTAGAAATAGCAATGCCACGTT  
 CTTTTTTGAAAAGTGTAAAGACGGCTACCAAAAAGTCCCAGCGGTATGGCTTACTGTCAACCCCT  
 GGACTACAGGAAATCATGCCGGCGGACACGGCGGCAACCGCTGCTACCGAGCCGAGGATAGG  
 CAGTGCTTTTACCCAGTAACACCCAAGAAAAAAGAACAAGTCGACTTTCGGTGTGCCACCGA  
 GAGCGACATTGCCATGAACCGCCGACGACTCATGCTCGCCCAATCGCGTTTCGCCTTCGACGAT  
 TCGGCCGCGGCGGCCGTGCCGACAAAACAGCACAGCCCGACACTGAGTATAGAACAACGGCT  
 GGCCGATCTGACCTCCCCTCGACGCCACCCCGGACTCCCCATCGCCAGCACTGCGGGTAGCCCC  
 CTGCCTGGCCGACCCTCGTCGGCCGATGCCCCAGCGTCATCGATGCCGCTGACGTTGACCGTTC  
 CCAAGGTGCACGGAAGCCCAAGAATCAGGCCGGAAGTGCGCGCCGCTTAGGTTGATGGATGTT  
 GGAGTCGCGGCTGCATCCGGGTACAGATTCCAAGGCGAGATATCGAGTTATGACATCCCGTCAC  
 CTCCATCTAACGGTTTTATCAGTCGAGAAATGACGGAGTTATTAAGACGGCCGGCTAAGTTAC  
 ACCGATGTCTACCGAGCCCGCTTCGCCAACTGGAGAAGGACATCGTCGGCACGCTATCCCCCG  
 AAGATCTCCGGTGGTACAACGCCAAGGTGGGTCTCGCCATCCCAAATTCGCCTCCTACCGGCC  
 ACCCTACGGAATCATGCACGACAACTGCATGCGGGGTTTCGGCGGCGGTTTCGCGACATGAGTAT  
 GACTTCGGTGCGGTTGTGCCCCAGCGGTGTTTCGCATACCCGATCGTCTCCAACGACTCTCGCCC  
 GACGTGACGATGTCGGTGACGAGAACTTCTTGATTGCGCACCGCCTTCGCACCACGGGACCT  
 ACAACTGTTTGGACTGCGGAAAGGTGTTTCAGTACACCTCACGGAAGTCCACGTGCGGA  
 GGTCGCATAGCGGCAAGAGGCCGTTTGCCTGCGATCTCTGTCACAAAACCTTCGGACACGCTGT  
 CAGTTTGAGTCAACACCGAGCCGTCCACTCGCAGGAGAGATCGTTTCAGTGTAAGCAGTGCGG  
 GAAGACGTTCAAGCGGTCTGTCACGCTATCGACACACATGCTGATCCACTCCGATACCCGACCTT  
 ACCCGTGCCAGTACTGCGGGAAGAGATTTACCCAGAAATCGGACATGAAGAAACATACCTACAT  
 ACATACAGGTGAAAAGCCACACAAATGTCTGGTCTGCGGAAAAGCCTTCAGCCAGTCCTCGAAT  
 CTCATCACCCACAGTCGTAAGCACACCGGTTACAAGCCTTTTCGGTTGTAAGATCTGCGGGCGGG  
 CCTTCCAGCGCAAAGTCGACCTCAGGCGCCATTTTGAGACGCAGCACCCGGAACAGGACAAGT  
 CGCAGGCGATTACCCGTTGGTGCCCCGCCGTAACACCCCGACGAGTGTGGGGTCAACGCCCG  
 TACCGGTTCTCCGACACGACCCGGGATGCATATCGGCGTGCCCATGATGGCGATTTGAGG  
 AACGCAAAGACTCTTAACCCAGTCAGTACCTTCTCCAGAACGTCACATGCAAAGCCGGTGGAGT

TTTCATGTAAAGAACTGAGAGGGTTATACCACTGAGACATGAAGTGGAACAAGGAAGAGACA  
 AGTCCGTGAAAACGCGGTGAGAGCGCGTCCGTGGAAGCGGATTAATTAATTAACGACAAGA  
 GACAATCAGCGTATCTCCATTTTCATGTGAAATGTTTCATATTTTCACATTTTCGATGACCGAAAA  
 GGCTAACAGGATCTTGTGAAAGACAGAAACCTTAGGAGCGTGAACGACAATCAATTAATAATG  
 ACAATCTGGTATTGAGATGGAAATCTACAACAGGCATCAAACATTCTAATCAAACGGTTGTCTAAT  
 ATACAATCCAATGACATTCCTCGTTATAAAATGCGATGCACTACCATCCAATGACATTCCTTGTAT  
 TTATTAGATGTACTATCATCCAATAACATTCCTTGTTACTAACAGCTGTAACATCATCCAGTCACGTT  
 ATGTTTATTGTAGAACTTTTAAATTAACCTTTGACCTCGACTTAGAGCCATGATTCCATGGTATT  
 TTGCAATCGGCCGACAAAGTGCAACCATTGTAAGTGTATAGATCAGTTAATTTGTGATAAACT  
 AACATTTATGCAAAAATATTTTATTTTAGATGAATCATTAATAACTTAGAAAATGTTTTGAAATATCA  
 CACCTTACACGATTGTTAGTGAACTGCCAGTACATGTGGTTTTCTTCTGAGGTATAGGTGATTTT  
 TTTTATATCAAACTGAAACTACTTCCTTAATTGGCAGTTGCTATAAATAATTTGCTTAAACATGAT  
 TATGAATCATAAACTGATTGATCATGTATTACAAATTATCTCGGGATAATAAATAAATATTAATAATG  
 TGACAAAACATTTATGTTTGCATATTTACTAGACTCCCGATATAACATAATTGTGTGATATTAATACG  
 AAATGAAACACGACATTTTAACAAAGCAATACTTAAGTCATTTAAGCTAGCGAACAAAAAAAAA  
 AGAAATTAATTTGAATCGTTTTTAATCAACTAAAATACCTTTAGCTCATTTGAAAGATTGTACGG  
 AACTATCTATTAGAACAGTTTTTCCTTTATATTTTTGTGCTAAACCAACCACTCGTCCATGCATATC  
 CAGTTTTCTATAAAGATGAACTATTGTATAAAAACCATGTTTCTTAACTGACTGTTTCTGTTTA  
 TTTTCAGTGAAAAGACAATATAATTGAAGTAAATTTACGATGTGTTAACTTCGCACGTTTCTTGT  
 GCTTTCTGATGTATCTTTTAAGATATAAGTTAATATTGTGCTCTTCATTTTTCAAATGTAATTCTCTC  
 ATGGAAGTCAAAGAGTGAGTTTGCTGTAATATGTGATTATACATCTTGAAGTGGCGATGATTC  
 TGAAAGTCCAAAAGAGTGAGTTTGCTGTAATATGTGATTATACATCTTGAAGTGGCGATGATTC  
 ATGACAATTGTATAAATTTATATACCAAAATTTAGAGTAGAATATTCGCCAATCTAAAGATACGG  
 TAATTTTTGTTTGCAGAGTGAATTCTAAATATATAAATGTATTATATCATGGGTGTCTGTGTATATATC  
 TGATTGTGTGATTTTTGTAACCCAAAGAGTGCAGAGGAAAAATGTCGATTATGAATAAATTTGAA  
 GAACTGAAAGATAGAAAACACTGTTGTGATCGAGTTTGTGTTTTTAAATTAATTTTTGTAC  
 GTTCTGTTGATTTTATGTGGACCAATATTCGATGTTTGATTTCCTTGGTCATTATACCAATGTA  
 GTGTTTTAGTTCTCCACAAATACAATACCTACAGTTACA

**>foxA**

GTCAATCTTGTCGCACACGGGTCGCTTTGATTTGCTCCGTACAATCAGTGGGCGTGCGTATTAA  
 TTAGCTGGCGGTGGAGCATATTACATAGGTCAGGCAAGCAAACCTCGAGGTTACAGTCTCTCT  
 TGCATGTTTGGAGTGGCTATGACAGTTTGAACACACCACTTTACCACACGCACACGCGTACACA  
 ACAGTCCGGGCCGACAGTATATACATTCGTAGAGATATATACACACATACACACTCAGCACGCAC  
 GCGGGTGAGAAACAACGTGAGCAAACCTGTTTTCTTCGTCAAATCGGGCCTTTTTAACTTGTC  
 TCGTGGAGTTCAAGGGGGAACCCATGGCAAATAGCGCCATGATTCACCCAAGCCTGGGTATCC  
 AGCGGCCCTCGCCGGTCACCATGAATACGATGACCAGTATGGCGGGGATGGGGTCCATGTCGTCG

ATGAACAGCTATGCCAGCTCGATGAGTGCCTCGGGGATGCCGGCCAGCGCCATCTCCAGCATGT  
 CGACGATGTCCAGTATGTCTGGTATGGGCATGAATGCAGGAATGGGAGGCATGGGGCAACATAC  
 CATGAACAGTATGGGCGGAATGAACTCTATGGGCTCCATTAATGGCATGAATTCGGCCATGGGA  
 GCCATGAACAATCCTGCTGCGATGTCGATGAGGTACGCCAGGCGCAGGCCGCGCAACTCCATTG  
 ACCGTATCCGTGCCGACAAAACCTACCGGCGATCCTACACTCATGCCAAACCTCCTTATTCCTACA  
 TCTCCCTCATCACCATGGCCATCCAACAATCACCTCAAAGATGGTCACTTTGAGCGACATCTACC  
 AATTTATCATGGACTTGTTTCCCTTTTATCGCCAAAATCAACAACGGTGGCAAAATTCGATTGAC  
 ATAGTTTGTCTTCAATGACTGTTTTGTAAAGGTACCGAGAACGCCAGATCGACCAGGAAAGGG  
 CAGTTTTTGGACTCTGCATCCTGATGCCGGTAATATGTTTGAGAATGGATGTTATTTGCGTCGCCA  
 AAAACGCTTCAAATGTCCAAAAAGGAGGCTCAACGTCAGGCACAAAAAGCGGCAGGTGAGG  
 ACGGTCAGCCCGGGGAAGGCCACAACGGCGAACCCAACACGACGGGGGCATCTACACCGGTC  
 TCACACCCACGCCCACCGATTCCGTAGCGTCAGAAACATCTCTTCCCAACCAGAATCAGCAGCT  
 CGAGCACCCGCAACAAGTACCAACCCCAACACCAGCACCAACCTACCACGCTGCATAAGTTA  
 GAAAACCAACAGTTGTCGCCGCCACACACCATGAGCAGCTACGTGAACCCGTCGCGACCCATCG  
 CCTACCCGGCCGCCGCGCGTCCATGGGCATGTCGGGCATGACGAGCATGCATCCAGCGAGTAT  
 GTTGGGCCAACATCCGTGCTTCACGCATACCCACCCGTTTTCCATCAATAGCATCATTTACCTGA  
 ACATAAACTGGACATGAAGGCCTACGAGGCTATGGGTATGCTCCATACAACTCAATGTCAGGGA  
 TGCCCACTCAAATGGCTAAACCATCAATGGACTATAACTCACCCATGGGTACGGGGGAGGCAAC  
 ATACAGCCAACTCACTACAGCACAAACAAATCACGCGCTGTGATGTGATCAGAACTGAACT  
 GGTATGTCACCTTAAACATCTTTTGTAAATATCAGATATGTACGTATCTTCTTGAGAAACATTTGA  
 TATGTGCTTACGATGAATGTTGTGGATCTCGAAGATGTTGGAAGGCAGGAGGAACCACTGAGGT  
 TAATACTCGGTGAAGTCTGGTGTGATCGACAATCACATTATGTGCAAATTTAATCATGTCTAAAAG  
 AGAGCTTTAAATACTTTTATGCGTTTTCCATAACTTATCAATTGTTGAAATCACTCGAATGAAATGT  
 AATATGTTAATTCTGAAATCAAATCGAACTTTGAGCAATGTAATAAAACAGATAAAAACAGAATT  
 TAGGACAGAAAAGGGTACGTTGAGATTCTGACAATTTGCTTTGTCTCACATCAGGGGATTTGTT  
 GATATTTATTTATTTGATATTGGTACATATTAGTTTAGAGTTTGTCTATATATTTAGATAGGGTTAG  
 AATACAAACACAACCAATGAGCCCACTATAAACCATCCACGCTTTAATTCTGCTAGTAAACCTTGG  
 ATACAAACTGTGTATTACATCCGCAATTTCTGTTCAATTTTATCTGTTTATTTTAGTTTCCCATATAA  
 GCATTACTTTTGCCTTTTATGCAATGATCATAACAACATGTACAGTATCAACCCGTCATGCATGTATA  
 CCTTTGTTAACTGTTTGTATAAATTTGCTCAACCCATTTCAATGATTGAGATATGATTTGAAAACCG  
 AAACAAAAAGTTGAAAATTTGTAATTATCAACATTTTGATTAAGGTGTTTACCAAAGTGCCAAA  
 TGCAATATTCATATTTAAAGAAGTTTGGTAGGTTTAAAGTAGTATGATTTTTTCGTCTTTTTGTAG  
 TAAGCGTTTCGTGTCAAATAATGTAAGTATTCAAACATTTTAAATGTCAACCGAGATAATTTCTCGTA  
 TCCATTTTGATACAAAGTTACAAAGAACAACATAATTCAAATAAAACGTGTCAATGCTATTTAAAA  
 CAGACCAGCTATAAGATTTATATTTATATATAGTTTCGGATATTTAAGCAATGAATTGCTCATTTAATG  
 ACCCGAAGATACTTAAGAACCGAGTGTAAGGATGATTTGTTATCATTTTCATATGCGTTGCATCTTT

ATTTTTCGTTGCACAACTCTTTTGTATACCTTAATCTGTATATTGTCGGTCATACTTTCATGACA  
 TTTTGCATGTTACGTCAGATCGAGAGAAATTGATTCTATACGGAACGTATTGGTTCTTCAATAAA  
 AAAAAACAAAAATATTCAATGAAATATATTTTCTGTTGCATTGATGTTATATTCTCATGATATATGAAT  
 GGAAATATTTGTTGGTGCCT

**>myc**

TAATCGTACAGCTGCTATCACAGCGTAGGCTATTTGCGGAATTTTATATGTTACGACCATATTCTG  
 TAGAGGTCATTCTGTCTCGTTCGTGTGTTGAGACTCAGTTGGAATTATCGTGTGGACTTGAACAT  
 TTTCTGTCTTGTAAACCATATTTTACTTCGGAATTCCGAAAGGAGCTTGTGCAGTGCAGCCCTTTT  
 TGGATAATATCAGGAATATATTCTCCAAATCCCGTTCCCTCATCAACCACCACGGAATCGCAAA  
 TTCAAAATGGCTCATATTTTGGATACGGACTTCGACCCTTTCAAGCAGTGTTTCGTAGACAACAG  
 CGATGTCGAGTTCTACGGATCGAGCGCCTCGCCCAACGCGACGACGCCAGCGAAGACATCTG  
 GAAAAAGTTTCGACGAGGACTTGGACCTGTCTTGCTTTCCTACCCACCGCTCAGCCCAACCCAC  
 CCCAGCAGTGACGGGGAGGATAGCGGTGGCGGAGGGGGGTGTCTGGCCATGTCGAGCTCATT  
 CACCGAGAAGTTATTGCGGGTCTCTGAACTCCTAGATGATGAACCTGCATGGATGACACAAAGT  
 TTTGCCTTCGCTGCTCCCGAGAAACGGCCACCGACTCCAACAAATACGACCACGATCATCAAAA  
 CGCCAAGTCCGGCTAGTTTGCCGAGTTCCACAAATCGAATTATCTGATACAGGACTGCATGTGG  
 AGTGCCATACAGGCGGAGGAGAGGCGGCGGCAGATGCAGGCGGAGAAAGCGGCTAAGAAAC  
 AGAGCCACGCCGGGAGCTTGGCTGCCATTGCACAACTGGCGACTTTTCATCGGGGGATTGTG  
 TGGACCCAACATCAGTGTTCCCATACCCACTCAGCGAGACCCGTTAACTTGGACCTAACTACC  
 AACACTCCGTCCGATTCCGAGGAAGAAATTGATGTTGTACGGTGGAGAAAAAGTGTCAGCCC  
 TCATCACACAATGTTCCAAGGACTATTATCATCAAGCGACACTCCAAAATGTCGCGCAACAGAG  
 CACACAAGTCATAAAAGTGTTAAAACGTTGCTCGTCAACAAATCCATTTTGACCAAGGTGCCTA  
 TGAAAAAACTGAAAACGCAGGCCAGTTTGGAGGAGGTCAAGCGCATGTTACAAAACCTCTATCA  
 CCAGTACGAAAACGAGGGCGCCCTATGGCAGCAGAGGTAGCAGTAGGAATAGCAGCCGGGGG  
 AGCAGCAGGTCAGAGAGTCAAGTCTCGTCAGATTCGGAGGATTGTGACCGCAGGGCGAACCA  
 CAACGTCTTAGAGAGGCGGAGGAGAGAGGACCTGCGGACAAGTTTCTTCAGGTTGCGCGACG  
 AGATTCCCGAGCTGCAACAGCAGGAGCGAGCAGCCAAAATCGTGATTCTCAAGAAAGCGATGG  
 ACTATGTTTCATGAATTGCATGCGGAGGAGGACGTTCTCGTAAGGCAACACGACGCCATGAAGCG  
 AAGGCATAAAGCACTGTTGCAGAGATTAAGGCAGTTGGAGTCTTTAAAGTGACACTTGTGTCTT  
 AACCGGATGTGAAGAAAACATTAACATGACGTGGTAGCTCAGCTTTACCATATGATTGTGACCAA  
 GGAAATGGCATCTGCATTTGCAGGACCAATACCTGGAAGTTTTAAGTTGCAGGGCGCTGGACACA  
 TGCAGCATAAAAAATGAAAGTGTAAGATCAACAAACAAAACCTGATCTTTGAATGCGGGCCGAGGT  
 GCCCAAGACTCGCTTCCCAATACTAGTGTCTGGGAACCAGTCAAGTTTAGGGGTTGTATTGAATA  
 AGTTGCATGAAAGCATTTCAGTCAGAAGTGACATTCTTGAATATTCCAAAATATTAAATGGAAAAA  
 TGTGTCTTAAGTTTAAGTCGATGATGGGATGGATTACGACATGACACTGCCTTATGTAACCTTTCA  
 TTTTTTATGATATGTCACCTTTAAATTAATGTTTGGTTGTGAAATCAAAAGCTTAAATATTTGTAT

TTTGCATATTGCAAGAATATCAGCTGTGTTACACTTAGTAATGATAAATAACTGAATCTTCCAATGT  
 CTTTATACCTTTCTTTTATAATTTTGTATTAAAAGGGAAAATGAAAAAAAATCCAAAAATTATC  
 TTGAATTGTGTAGGTGACTTTTTTGTGTTTTTAGCACTATTGATTAGTGTGGCAAACAGATTG  
 TGTCATACTTGTAATCAAGATTATTTATTAGTTTGAACGTGATGTTGATCGTTTTTGTCTGT  
 AGCAGTTTACAGTTTATACGTACTACATAGTTTTATTTGTAAAATATTGGAAGTTGACAATGGA  
 AGTTGGAAGCTATCCTACCAGGACGAAAGCGGGATCCCAATTGTGGTGGCTTCCCAACGACGTT  
 TTGTGTAAATTTAAATTGAAATTATTGTAAAAAGGAACAGATGTATACAGAATTTATAAAGGT  
 ATTTGAAAAGGTTTTATATAATGAAAGTGTGACTTGAGGAGTAATTTCTTACTCAGAGGTTA  
 TTGGACAGATTAGACAAGGTTTACATCTACATGTATCAGACAGAGAGAGCAATTTATGTTTACAG  
 AAATTAGGTGAGAAAATCTATGACGAGAGTTAAAAGACATCTATTATCATTTGTACAGTATTGAAT  
 AAAGTGTACAATGCTTATATTTTCATTTTATTAGAAACATTTTCGGATGGTGTGTAGGCCTATA  
 TGTGATACAAATAATGGGTGCCCTCTGCGGTGGTGTGTAAAAAAGCGTCATTGTTTTCACTTT  
 TCATGCTAAAAAGTGTCTAACCTAACGTGTAGTCGTTTACAAGTTTCAAGCTGAGGCCACCCCA  
 AAACCTTCCATAGGACGAAGCACCCAAAATTTGAGTAGAGTCCACACTACACATCACTGCTAGTT  
 TTTTATTCAATGACAAATATTGACCAATATTTTCTCGTCCAAATATTGCAATAGTTACTAAGTAGC  
 AGAGTTCATCATACAAAATATTACTGTAGAGCTTACTACCCCTCCCTCACGATTTGTACAGCTTT  
 GATAGTTTGATTATCCTGTAATTAGCACACAAAAAAGAAATGCTGTAATTTTGTATCACTCGAT  
 GAGATTAGCTATTGAGGTTTAAAAAAGTAGTCCAGATGTAAATTCAGAAAATAACCTTACCTAGT  
 TTGTATTGTATTGCATCCGAATACAATGCCCATTTGTAGTGTTTAAATCCATCAACTATTAAAGTT  
 GTGTTAGTGAAAAATCGGTGTACACATAAAGAAAAAATCAATTTATGTATGGC

#### >klf2/4

GTCAAAATTCCATGACGTATGCCTGCCTCATTGCAAGTCAACAAGGGTATCTTTTATTCGGCCGA  
 CTTTGCATATCGTTGATTCATGTTTATTCATCGTTGCCATGGGCACCGGGAGCTGTACTCTCGCC  
 GAGCCCGGTACACGACTGAGCGGCGAACTCGCGCGGCAGCCGGAGTATATATACCGGTCTAAT  
 TTTAGATATGTAAATGAACCATACTCCGCGGCGCTGATTGGCTTACCGCGACAGGCTTCAATGAA  
 CTCGTAGGATCTGGCAATGTGATTATAACCGCTACACAAGCTCATCAGTGGTCATATCCGTCAAA  
 ACCTTCGTGCCGAATACTTCGTGTCTCTTGTCAATTTTCACTGCAAAAAACCAAAACATTACAAGG  
 AAAAGATGGCAGCTACCTTAGCAGAGGTGAACCAAATGGGATACTCCGATTTATCATATGAGCTT  
 TGGCCTGATATGGAGAGCTTCTCCAAGACATCTGTCCGCCAAGCATGGATGATGGGTTCTGTGC  
 GGCCCTCGCCTTGAGACCAGCTCACCCAACTCGATCGTTTACGATCGGGCAGCGACGGCAG  
 TGCTTGCTCTCACCCCGCCCGTCTCCCCGAATGTGAGCCGACATACGACGACCTATTGGATC  
 TGGATTTTCATCATCAACAACACAGGGCCTAGACTCGTTTTATCCAGACTCACCACCAGCTTTG  
 ACCAGCGTGGCCCCACAACATCAGCTGAAAATCAAGGAGGAGGCAACATCACCCCTCCCCGGG  
 GCCCTTCCAGGGTCTGACTGCATGGGACAGTTGTACGATGATGCCAGCTTCCGCAACATCCTGG  
 AGGCTAAAATGATGTTGGCGCAACCCCAACATCCAGCACAACACAAACAACAGCAATACCTGTT  
 GCCACATGAGCACCACATGGCCCAGCAACAGCACCACCAGCAACATCAGTTCCTCCCAACA

TACAGCATGCACCAACTCCATCTTGCTGCCAGCTGTCGCCACCAGACTCGCCACAAACCATCAC  
CGAGCAACCACCACCACCGTACACGCACCAGCACCTGGTTACCCCACTGACCAGGTTGGCC  
ATACCACAACAGCAGCAACAGTTGCCGCCACAACACATGATGCCGACGCCACCAACACACCAC  
CGACATCGCCACTCCTCGATCTCCTCCGCAACACCCAGTCGACAACGCTGTACCCACCACCGTC  
CCTGGGGCCCAGATCGTTCGCAGGAAGGGGAGACGCTCGTGGGGCCGCAAGCGCACTACCAC  
ACACACCTGCACTCATCCGGGATGCGGCAAGACCTACACAAAGTCGTCTCATCTTAAGGCCAC  
ATGCGCACCCACACCGGAGAGAAGCCATACCACTGCACCTGGAAGGGATGCGGATGGAAGTTT  
GCTCGCTCAGATGAGCTGACCCGCCACTACCGCAAACACACCGGAGATCGCCCTTCCAGTGTC  
ACCTGTGTGAACGTGCCTTCTACGATCCGATCACCTGTCGCTGCACATGAAACGTCACATGTGA  
ATGAACTGAACAATCTTTTAAAGATTTTATTTAAACAAATGTGAACACACACTCACACAGTGATT  
CTGGGTGTTTTGTTGTTACACAGTTGAGCTAAACCACCAATAAGGGTTGTAAAAATGTGTCAA  
ACCACACGAAGAAAAGTTAGCACCAAAATTGTTGAGCACATTTGAATATGTTACAGGATTTGTTT  
GCTTTATTGACTCGAGTTTAAAGTGTTTGGACTTAACTTTGAAATTGAAAAGCTCTTATTATCTGAA  
AATCCTTTGAAGGTGTGCATTGTAAATTGCTGCTTTTTTGTATCAGTGGGACACTTATCCATGGTG  
GTTCAATGGCCGACAAACGGCTTCCGAGCTAGTCTGACGAAGTGTGAGGTTTGTAGGTCATAA  
TGCGGAAAGTAAGGTAAAGTTCAACCTAACTGGTTGTACCAACCTCACTAGTCGAGTTGCACT  
CCGTGAAAGGGGGAGTGGGCTAATTCAGCATTGAGGAGGAGGAGGAGGAGTTTTCCGATAAT  
GTACCATCAGTGGTCGGTTACTAATTTAAACATTATTGAGATTGTTAGTGGTAAACTCGCATGC  
TTACCATGTGCCTCGTACCAGTACTTCGATTTGTATTAATGTTAAATTTAAACAGGAAAAGATC  
ACTGAATTGAAATTGTCAGCATTGATATCGTAATTGCCACTTTGTGTAATGTATTTGTGTTAA  
TACATAAATGTCTTGATATATTTATATATAAGATTCTTTTTTATAATTGGAAAAAGGCGTTGATCGC  
CAGGTTTAATTATACAGCTAGTCTGATGATCATGGTTTCAAAGTATGCAAATATGGGTAAACGAT  
TTGCCAAACATTGACATTTTTATGACTTTTCGTCAATATTTTTCAACTCTTGGCAGATACTTTGAA  
TACCTACACCATAAAATGCCTTATTCTTGCTAAAATATTGATGAACTTGAAGAATAACGATGTGATA  
AGGAATGATTTTGACAACTCATTCTCCAATACAATTTGTAATTTCAAAAGACAAATTGTTCTCAA  
CTGAATTTGATGTTTCTTCACTACTAAATCTTACTTGCTTGAAGTTTCTTCACTACTCCTAAATTCT  
TACTTAAATCATTGCGCACTTCTATTTTTCGACAAAATTATTTTGAAACAATTGCAGCTGTTTTAA  
AATCACTTGATAATTTAAATCTTAATTATCATTATGATTATTTGTTATGTACAATTGTACTGTAT  
CATATATGTTATGTTTGATGATCAATTAATATCGAAATTGTGAATCATTTTTGCCAGTTGGCGCCATT  
GATTGAAATAAAATCCCAACTCGGGATCCTGAAGTATTGAGAAAAGAAATGCTAATAGTTTGAG  
CTTGCTTTTGATGACAATTGTGATTGGCTTATGCGAGGAGTGTGAGCGCTGGATTCAAGTGAGA  
GACTGGTTTTGGTGAGTAGTGCTGTTTTCATTGCGAGTGTAGTGTTCGGAATTGATATGTGT  
GGACGGTGGAATGATAAGATTTGATACCGGTCTGAGCGAGTGTGGCAGTCTTTTTAGAAATGAT  
GACACTTTGCAGGCGTGAGGTTTATGTTACAATTACTCGAATTTTTATAAGCACG

>creb3l3

CAAATGACTAATACATATTAAGCACAACACACAAACGTAGATGTCATACAAATGGAAAATACACAT  
 TTATTATGTACATTGTTTGATACATTGTAATCCACTGTATGTTAGTTTTATGTTCTTTTTAATATTTTA  
 TAACTTTAATATGACATGATTTATATACACATAATATGGAAGAGATATCCGAGTTTTTCAATGGAAG  
 CCTGGTTGCCAAGACTAACTGGCATCACAATGTACACATTTACATTACATCATATATATTCCA  
 ACTATGGAATATATGTAAATATTTTCATATCTTCATTTTCTGTTGGCTTCATAACAAAAGTGGCATA  
 TTGATTGTTTCATGAAAAAAGAAAAAAGTACAATTATATGAGTGATTCTATTTAAGTATGAAA  
 AGTAAGAAATATGTTTTCTTACGTTAAAATTTGTCACAATGACCTCAAGGTTTAAGTCTCATATTT  
 TGATAATGATTCATAATCACTTAAAATCTTATGTACACAGAATCCATAATAAAAAGGAAAAAATGC  
 CAATATTTTGATGGACAAAAATGTGAACAAATAACGAAATATCAGAAAAGAGTACTTCAGTACAT  
 AATTGATATGCCATGTCTGTTAAGAGTGAAAATAAGATCGAAGAGAAGCAACTGAATGATTTTAC  
 AAAATATTTTACAATACAACCTATTTCAGCAAATTAAGACAATATTAGGGTTTTGAAATTCCAATACA  
 AAATCTGGATCGTAATTCCTGAATAATCTCACATTATGTGCAACTGATTATCAAACTGATGTCCT  
 TGGTCACCCAAAACCAAAGAAAAACAAAAACAGAACATAATCTTCAACATGAAATTAAGGCACA  
 AAATAATACTTCGCTATGTTTCAAACACATAGCAATTACTTTCAAGTAATTGAAGGAGCACTTATT  
 CTGATATCTACTTATTCTATTTTGATACTGAGCTGCAATAATTCAAATTTCAAAGCTTGATAGCTCAA  
 TTTTTTTTTTAGAGAATTTTAAACAATACTGTTTTACATACAACAAGGACATGCTTTTATAGAGTTA  
 CATAAATATAACAATAAATAAGCAATACACACTGGTTTGGCTACGTATTTATTTTAAAGCTTAAACG  
 TACTAACTGGGGACATTTGTGCCTGCACAACAGCCAGTTCAACATAGATTGTTTCAGTATAACT  
 ATAATGGGCAGCAGACAAATATTTAAATTTATACAAAAATAAATAATAAAAAATTGATAAACAGGG  
 GGAGATGTAAATTACTATTCAACACACTTCACGTGAAGCAGGCAGCTATCATTTGGCAATATTTTT  
 AATACAAAAGTCATGTAGGATACCTCATACAACCTTAATCCCTTAAATATATTTATTGGGCGTTCAGA  
 CATGCTGTTTATACATGTTGTATACGCAAATAATATGAAATACATATAACGTACATGTATAGCATAATT  
 AAGTGTTACACATTCAGTTTATTATGCATTATGAGCACTGTTTGGCAGTACAAAGCGCAGCGAA  
 TAACAAATTCACCGCACATACGTAAACAAAGGGCTTATCACATGGCTCTGCCCCCTTATAAGCATA  
 AAGCTTCATCCAGTCTTTAACACATTCGCTATAATGTGTAACACTATACGAAGTACATACAAAATGC  
 TGAATAAATGTCAGGGTAGTTACATGCATTTCAAACCAAGTTTCTTAATACGTGGTCATTTCAGATC  
 CGATCGGGATATTTCTATGAAATACGTATGAAACCGAGTTTCATATGCGTACAAAATCTGTATAAAT  
 GCATGTCTGAATGCCCTATATGATTGTTCTTTGTACACGTACCCATAGAACCTAGAAGGCAACA  
 ACTAATCCCTCAATAAATATACTTTAAACTATCAATCTCATACTATAAATAGGGTCTGTATACAGTA  
 CCATGGTCATATTCTGAGATTACTGAGAGTCTGATTACTTTTATTTCAAACCTGATGTAAATAATAAA  
 ACATTTATTCAATTTCTCTAAAAATTACCATTTAAAACTCTTACGTCTTAAAGATTTGTCAAAAATG  
 ATGTAACAAGGGCGAGTTCATTAGCTTTAAGTAATACTTTTTGTTTGAATACGCTCAACTGTAAAT  
 ATTTTGCCTATTCAGATAATGCTACTATCTCTACAAACCCATCTATAGACTATCCATAGATAACAGAT  
 ATTTCTCAAATCTGAATTTACTTCATGTCTTTTGTGCTTTGTGTAGATAATAAAATAAATTTAAAC  
 GAAATGAAAATAATTGGTATAATTTAATGTTTATTCAATATGTGTAATGAACCTGTCATATTCCATAT  
 AGTATTTTTGTTTCTTTTGTATCCTTCAAAAACTTCAAGCTCACCAAGAAAATTGCAGCAAAA

CAACCCAGCCTCCTAAAAATACTGGTTAAAAATAAAATACTTTAAAGAGAGAAAGAGAGAGAG  
GCAGAAAGATAGAAGGTAAAGCCCACTACAACATTTCTATGCCATAACAACCATAACATTACC  
ATAATAAAATATAGTAATAAATAATATATTTTGTCTGTTTTCTCCTTTTTTTCATCAAATTGTTCTAAC  
TAAATTAATACTAAATTTAATACTTTGACAACTTTTTGAGACATGATTTATTATTCTACATTTCACTAT  
TACCTTCATCTTATGAACTTTTCAGTTACCATTATGCACTCGTTTGCAATCATTGACACATAATCT  
ATTTCTCTCGATACATCTTTGACACTACTTTTCTGAATTTATTTTTCTCAATTAATTAGTTTGCTGT  
ACAACACACATGAGGGACAAGGCACATATCAACATAATAAAAAAATTAGTAAAATATGAGAGG  
GCCTCACATTTTCGATCATAGCAGGACCTTTATCAAAGTTTTGCCTATGAAAAGGTCCTGCTAGA  
ATCAAATGTCGACCCTCTTATATTTTACAGTTTACATTCTCAGGTCGCTTTAGTAAATTCGCAGT  
TTTAACTCAGCAACGTATGCATATTCACCTGCTCTTATAAAGTACAGATGCTTGATATCTTTTCAGC  
TATTGGACGCTTGATCTATCGAGCCGACAGTCCGTAGGCTGTGACCAAGCGATTCAATTTTAAT  
GTAAATATTACAATAAAATGGTGTTAACGTGAATCTTCTCCATACGCTTCTAAAAGAGTTGATTTA  
CCGTGTTACATACTCTTTTCACTAAGGTACAGACTTTCTTTTGATTTGAAGCTTTAAATTTT  
GATGGAAATAGTCTGATGGCAATTTATATTTTATCGTTTAGAAAATAATTCTAACAGGAGTTAGAT  
CTGGAATTCAGTACATCTTTTAAAGAAATGATCAGCAAAGACACCATGCTATCAATTGAGGTTTAT  
TTGTCAAGGAAATGTTCAAATTTTTTCAAAGGAATGGCTCCCAAATATTTTCATTTTCATGTTTTT  
ACCCCAAATATTAATGAAATATCCTGAAAAATTCATGAGGGGGTAAACCCTCATAAAATAATTT  
AAATTCACGTATTTGATAATCTATTTGTGATGACAGTGTATCGAATTTGTATTCAATTTATTTGATGA  
TCTGTTAATCAATGCCATTGTATCGACAGGGATGAATTTAGCTTCGATGTCGGGGTGAAGAAATG  
TTTCCATGTCACTATCACCACGCTCTAAATTGGCCACAGGCGACCCTTGACCCCCAACAGTGGCA  
GCCATCTTGGCTGCTACCATGTTAGGAGCTTCTGGAGCGATGTTGTCCAGC

#### >atf4L

CCCACCCAAATAGATTACGTTGGCATTGAAGATATCTGTCCTTTGACCAAATGTACTTCAACCATG  
AGATCTTTGAGGTATTTATCTCGCGGGTCAGGCTTTCAACTTTGTCCTTCAGCGATTTGTTGATT  
TCTTCCAGTCCTTCAAGTTCATTTGTGACTACTGCCGTTTCTGCCCTTTTCTTTATGCGATATCGGG  
TGGCAGCCTGCTTATTTTGGTCACGCTTCCTTGATTTTCTGTGATTGGGGATGCATTTTTTCAGCT  
TGGGCTTGGACTTTGTCTTCTTGTGTTGGGGACCGAGATACCGTTTTTGATGTATCGGGTTCCTGA  
ACAGGTGATTGCGGGCTGGGTTTCCGGTTCAGTAGATGGGAGAGGCAGTGTGACCGTTATCGTTT  
CACTTTCCTCGAAAACGGTGTCGGACAGTGATGGGATGCAGCCCATCGCACTCAGCAATTCGAG  
CGCTTGCATCTCCACGTCTGCTGGGAGTGGAGATGACGGCTGCGATGTAACAGACATACTGTCTG  
GTTGGTGTGGTCTCGGAGTAGAGAGAGCTTGCCGGTGATAGGGCAAGGAGGTCGTCTGCCAG  
TGGGTCTTACCTGGGGATGGTGCCTGTGGTGGAAAGCGCATGTCCACCACGAGCTCGGAGAG  
CAGCTCCTCGGTCTTGGATGAGACGGCCTGCCCCCAGGGGAAGAAGGAATGCTCGCCAGGTC  
TGCCACTGGGACGTCTCCTCGTCACCGAGCCAAGGGGTGAGTGGGATCTTCTCGGACATCCAG  
TCTGGAAGTGGGTCATCAGATGAAATATCTGAATTCTGTCTGGAGACAGTGGGTCAGCAAACG  
AATCGTAGCTCGACAACCGCTTGCTGTCTTCAGGGACACTTCCATGTCCGATCCAGACCGAAC

TCATCCTCAGGTAGCGGCCCCCATAGGGTCGCGTCGTCGCTGAAAAGCGACAGGATCTGCAAGT  
CTTCCAGGCTCATTGTGTTGCCTTATGTGGTCTTCTTGTGATGAAGATCGGAAAATGAAGGTTTC  
GATTCGTTGTTGTAGCTCGTTGGAATGGCTTCCAGTAGGAGCAAACATGCAGGAGTGGGTGTCA  
TTTTGAGATGCCATGGTGCCGGTAAAACCGAGCAATTCCTTTAGAATTGCCGAAGAAAAGTTGC  
CAAACATATGTCACACAGCCATTTTTGCCAATATTTGCTGAGCGAAATTCTGTATGTTGTTCTCTG  
ATGAAATAAAG

## Data S2

### The HD sequences used for phylogenetic analysis.

>Hp- Micro1-A

RRRSPTVFTELQLQILETVFNDNQYPGITTREQLASNLKLGEDRIKVVWFQNRRLRRAS

>Hp- Micro1-B

RRRSPTVFTELQLQILETVFNDNQYPGITTREQLASNLKLGEDRILVWFQNRRLRRAS

>Hp-Micro1-C

RRRSPTVFTELQLQILETVFNDNPYPGITTREQLASNLKLGQDRILVWFQNRRLRRAS

>Hp- Micro1-D

PRRRPTVFTELQLQILETAFNDNQYPGITTREQLASSLKLGEDRILVWFQNRRLRRAS

>Lv-Pmar1

RRRRPTVFTDLQLRILETVFNDNQYPDITTREQLASSLQLKEDRIMVWFQNRRLRRAS

>Tt-Micro1

RRRRPTIFTELQLRILETAFNDNQYADITTREQLASSLHLGEYRIMVWFQNRRLRRAS

>Sm- Micro1

ARRLPTVFTEWQLQKHEAFNTDQYPDVNVRERLATSLLMEDRIQVWFQNRRLRRAS

>Sp-Pmar1-a

SRRHPTVFTELQLQILETAFNDNQYTGITTRDQLASSLKIGEDRVLVWFQNRRLRRAS

>Sp-Pmar1-b

RRRRPTVFTELQLQILETAFNDNQYPGITARDQLASSLKLGEDRILVWFQNRRLRRAS

>Sp-Pmar1-c

RRRRPTVFTELQLQILETAFNDNQYPDINTREQLASSLKLGEDRILVWFQNRRLRRAS

>Sp-Pmar1-d

RRRRPTVFTELQLQILETAFNDNQYPGINAREQLASSLKLGEDRILAWFQNRRLRRAS

>Ec- Micro1

RRRRATRFKWKQLETLAEFATNRYPDIDARERLAATLALGEDRIQVWFQNRRLRRAS

>Ds- Micro1

RRRRPTKFTKLQLETLVEFSRDRYPDIVSREKLAAAFGLTEARIRVWFQNRRLRRAS

>Pb-Pmar1

RRRPPTMFAKWQREQLEEEFSKNRYPDIDVRERLASSLQLTEARIQVWFQNRRLRRAS

>Et-Pmar1

RRRPPTMFAKWQREQLEDEFTKNRYPDIDVRERLASSLQLTEARIQVWFQNRRLRRAS

>Ak-PhbA

RRRSRTIYTTEQLNSMEAVFASNQYPDINSREALADAIDLTEARVQVWFQNRRLRRAS

>Ak-PhbB

RRRSRVNFTSQQLQSMEAVFAVNQYPDHRSEMLADAIGLTEARIQVWFQNRARRQKRQV  
 >Ak-PhbC  
 VRRRPHFYTTEQKEDLEYVFSKQSLNITSRIALADALDTTEEEVQLWFKNRRARLRRQT  
 >Ak-PhbD  
 RRRPRTVYTAEQMDALESVFAENQYPDINSREVLADALDMTEARVQVWFQNRARRLRRQA  
 >Ak-PhbE  
 RRRRPRTIYTAAQIEALESVFAANQYPDINSRETLADALDMTEARVQVWFQNRARRLRRQA  
 >Ak-PhbF  
 RCRSTINYTSHQLESMEAVFSVNQYPGYESREALADGIDLTEARTQVWFQNRARRQKRQDQ>Pp-Ph  
 b  
 RRRSRTIYNGMQINGLEACFKVNRYPDITRENLAMYGIMSEARVQVWFQNRARMRRQE  
 >Hl-Phb  
 RRRRLRTIYTAHQIRGLEQCFNQNKYPDITREALAMAIGMSEARVQVWFQNRARRLRRQE  
 >Aj-Phb  
 RRRSRTIYNGMQINGLEACFKVNRYPDITRENLAMYGIMSEARVQVWFQNRARMRRQE  
 >Apl-PhbB  
 RRRARTNYTPEQLSGLEALFEETQYPGIDERERLADSVDLSEARVQVWFQNRARRLRRKE  
 >Apl-PhbA  
 RRRPRTIYTAEQRKQLEEVFAVNQYPDIGNREILADAIGMTEARVQVWFQNRARRHRRHG  
 >Ppe-PhbA  
 RRRPRTIFTAEQRHQLETVFAVNQYPDITNREVLADAIGMTEARVQVWFQNRARRGRRHG  
 >Ppe-PhbB  
 RRRSRVNFTSQQLQSMEAVFAVNQYPDHRSEMLADAIGLTEARIQVWFQNRARRQKRQV  
 >Pm-PhbA  
 RRRPRTIFTAEQRHQLETVFAVNQYPDITNREVLADAIGMTEARVQVWFQNRARRGRRHG  
 >Pm-PhbB  
 RRRARTNYTPEQLSGLETFLAKTQYPGIDEREALADAVDLSEARVQVWFRNRRARRLRRRQ  
 >Sp-Phb1  
 RRRSRTIYTRLQLESLEQVFRTNKYPDINSREALADAVDLTEARVQVWFQNRARRERRLE  
 >Et-Phb1  
 RRRSRTIYTKMQLESLEQVFTQNNQYPDINSREALADAIDLTEARVQVWFQNRARRQRRMV  
 >Pb-Phb1  
 RRRSRTIYTKMQLESLEKVFTQNNQYPDINSREALADAIDLTEARVQVWFQNRARRQRRMI  
 >Afi-Pplx  
 RRRPRTVYTRKQIEVLESAFADNQYPDIFTREDLAEVLDLTATKVLVWFHNRRARRHREA  
 >Afi-Phb1

RRRTRTIYTPEQLASMEAVFASNQYPDINSREALADAIDMTEARVQVWFQNRRAQRQQG  
 >Oj-Phb  
 RRRSRIKFTEEQNLNQLIFYESNRYPDINVREDIADCIDISEARIQVWFQNRRAQRQQ  
 >Bf-260801382  
 QRRSRANYSQWQLEELEKAFETTQYPDIFMREALALRLDLIEARVQVWFQNRRAKLRRQL  
 >Sp-OTX  
 QRRERTTFTRAQLDVLETLSRTRYPDIFMREEVAMKINLPESRVQVWFKNRRAKCRQQQ  
 >Pm-otx  
 TRRERTTFTRAQLDVLETLSKTRYPDIFMREEVALKINLPESRVQVWFKNRRAKCRQQA  
 >Ci-gi74136734-otx2  
 QRRERTTFTRAQLDILEALFGKTRYPDIFMREEVALKINLPESRVQVWFKNRRAKCRQQV  
 >Bf-260831719  
 QRRSRTTFPEQLEELEKAFERTHYPDYITREELAQRKLTARVQVWFQNRRAWRKQQ  
 >Bf-260791951  
 KRRNRTTFTSFQLEEMERVFQKTHYPDVYMRQLALRADLTARVQVWFQNRRAKWRKKE  
 >Sp-alx1  
 KRRNRTTFTSYQLEEMEKVFQRTHYPDVYCREQLALRCDLTARVQVWFQNRRAKWRKRR  
 >Bf-260791955  
 KRRNRTTFTSFQLEEMERVFQKTHYPDVYMRQLALRADLTARVQVWFQNRRAKWRKKE  
 >Bf-260796220  
 QRRYRTTFTSYQLEELERAFKTHYPDVFTREELAMRVDLTARVQVWFQNRRAKWRKRE  
 >Sp-arx  
 QRRYRTTFTSYQLEELERAFCKTHYPDVFTREELAMRVDLTARVQVWFQNRRAKWRKRE  
 >Ci-gi118343664  
 QRRYRTTFSQLEELERAFQKTHYPDVFTREELAMRVDLTARVQVWFQNRRAKWRKRE  
 >Bf-260802229  
 QRRIRTTFTSAQLKELERVFAETHYPDIYTREELALKIDLTARVQVWFQNRRAKFRKQE  
 >Sp-phox2  
 QRRIRTTFTSAQLKELEKAFNETHYPDIYKREELALKTDLTARVQVWFQNRRAKFRKTE  
 >Sp-chx10  
 KRRHRTIFTSYQLDELEKSFNEAHYPDVYARELLALKTDLPEDRIQVWFQNRRAKWRKKE  
 >Sp-gsc  
 KRRHRTIFTTEEQLQLEATFEKTHYPDVMLREELAIKVDLKEERVEVWFKNRRAKWRKQK  
 >Lv-gsc  
 KRRHRTIFTTEEQLQLEATFEKTHYPDVMLREELAIKVDLKEERVEVWFKNRRAKWRKQK  
 >Pm-gsc

KRRHRTIFTEEQLEQLEATFEKTHYPDVMLREELAMKVDLKEERVEVWFKNRRAKWRKQK

>Bf-260831451

KRRHRTIFTEEQLELLEKTFEKTHYPDVLLREELAMKVELKEERVEVWFKNRRAKWRKQQ

>Bf-260801388

RMRVRTNFTSWQLEALERAFETTHYPDIFMREALALRLDLMESRVQVWFQNRRAKWRKQE

>Bf-260790761

MRRVRTTFSAEQLKALEDVFKVTHYPDVHTREQLARKTKLPEARVQIWFQNRRAKWRKYE
